# Supplementary material for: Multi omics analysis of mitophagy subtypes and integration of machine learning for predicting immunotherapy responses in head and neck squamous cell carcinoma
Source: publisher site journal article supplement (doi:10.18632/aging.205964), 2024-06-21
Supplement: Supplementary file [file aging-v16i12-205964-supplementary-material-SD2.pdf]

## SUPPLEMENTARY TABLES

**Supplementary Table 1.**  
**The specific transcription**  
**factors for HNSCC.**

---

**regulon**

---

CSDE1  
ZNF207  
LTF  
YBX1  
PITX1  
TP63  
NFE2L1  
XBP1  
HIF1A  
KLF5  
TSC22D1  
MAZ  
USF2  
STAT1  
EPAS1  
NFE2L2  
SFPQ  
IRF6  
EGR1  
ID1  
ATF4  
BHLHE40  
MYC  
HMGA1  
SSRP1  
ARID5B  
ETS2  
ZNF385A  
HMGB2  
PHB  
STAT3  
CNBP  
FOS  
JUNB  
FOSL1  
JUN  
MAF1  
ZFP36L1  
LITAF  
HMGB1  
SREBF2  
ATF6B  
NME2

ZEB2  
EBF1  
FOXP3  
TP53

---

**Supplementary Table 2.  
The list of Mitophagy-  
Related Genes.**

---

ATG12  
ATG5  
CSNK2A1  
CSNK2A2  
CSNK2B  
FUNDC1  
MAP1LC3A  
MAP1LC3B  
MFN1  
MFN2  
MTERF3  
PGAM5  
PINK1  
PRKN  
RPS27A  
SQSTM1  
SRC  
TOMM20  
TOMM22  
TOMM40  
TOMM5  
TOMM6  
TOMM7  
TOMM70  
UBA52  
UBB  
UBC  
ULK1  
VDAC1

---
