# Supplementary material for: Multi omics analysis of mitophagy subtypes and integration of machine learning for predicting immunotherapy responses in head and neck squamous cell carcinoma
Source: publisher site journal article supplement (doi:10.18632/aging.205964), 2024-06-21
Supplement: Supplementary file [file aging-v16i12-205964-supplementary-material-SD5.pdf]

**Supplementary Table 5. The result of Bootstrapping-based analysis.**

|    | <b>gene</b> | <b>times</b> |
|----|-------------|--------------|
| 1  | GRHL3       | 1000         |
| 2  | MS4A2       | 997          |
| 3  | SCNN1B      | 996          |
| 4  | ATP10B      | 995          |
| 5  | A2ML1       | 992          |
| 6  | TGM5        | 981          |
| 7  | BNIP1       | 978          |
| 8  | SASH1       | 977          |
| 9  | ALOX12B     | 965          |
| 10 | KRT80       | 893          |
| 11 | PLA2G3      | 891          |
| 12 | SPINK5      | 867          |
| 13 | ZNF831      | 781          |
| 14 | SLC26A9     | 749          |
| 15 | LY6G6C      | 742          |
| 16 | MASP1       | 722          |
| 17 | MUC15       | 683          |
| 18 | TMPRSS11D   | 675          |
| 19 | FAM83C      | 649          |
