# Supplementary material for: Multi omics analysis of mitophagy subtypes and integration of machine learning for predicting immunotherapy responses in head and neck squamous cell carcinoma
Source: Aging (Albany NY). 2024 Jun 21;16(12):10579–614. doi: 10.18632/aging.205964 (PMC11236326; doi:10.18632/aging.205964)
Supplement: Supplementary Table 3 [file aging-16-205964-s003.xlsx]

## Sheet: cluster_A_diffSig
Supplementary Table 3. Subtype differentially expressed genes based on limma algorithm.
cluster_A_diffSig
	log2foldChange	pValues	FDR
A2M	0.42853	1.40576e-05	4.89297e-05
A2ML1	1.17752	2.70894e-12	3.76989e-11
A4GALT	-0.290519	0.017375	0.0310528
AAAS	-0.278479	7.82461e-13	1.2349e-11
AACS	0.20853	0.000103495	0.000301175
AADACL2	0.413053	0.00888084	0.0169621
AADAT	-0.571939	0.000410938	0.0010509
AAK1	0.232455	5.55946e-11	5.86911e-10
AAMDC	-0.542495	1.0687e-09	8.61118e-09
AAMP	-0.217281	2.1525e-08	1.32832e-07
AARS1	-0.163356	0.0198472	0.0349959
AARS2	-0.140385	0.00175277	0.00393313
AARSD1	-0.517421	7.46678e-08	4.17053e-07
AATF	-0.297018	1.22435e-08	7.95702e-08
ABCA1	0.52262	1.1421e-10	1.12812e-09
ABCA12	1.16335	1.65418e-12	2.41134e-11
ABCA6	0.416879	4.97584e-06	1.90936e-05
ABCA8	1.09051	1.2848e-05	4.51918e-05
ABCA9	0.558961	5.4171e-05	0.000167708
ABCB1	0.583963	5.37052e-09	3.77044e-08
ABCB11	1.18259	2.16776e-11	2.50283e-10
ABCB4	0.369678	6.26943e-05	0.000191334
ABCB6	-0.676887	3.08257e-08	1.84836e-07
ABCB7	-0.186387	7.18087e-07	3.27957e-06
ABCB9	-0.278139	7.32091e-07	3.33866e-06
ABCC6	-0.484884	0.00780572	0.0150947
ABCC9	0.706519	1.70706e-08	1.07419e-07
ABCD2	0.742125	1.18138e-07	6.33358e-07
ABCD3	0.158441	2.26354e-05	7.57383e-05
ABCD4	-0.293352	3.25217e-08	1.93818e-07
ABCF2	-0.296683	3.24158e-05	0.000104899
ABCF3	-0.148928	0.0273904	0.0465507
ABCG1	0.370863	1.92535e-06	8.04252e-06
ABCG2	-0.0738869	0.0189379	0.0335816
ABCG4	1.13933	1.96151e-06	8.16958e-06
ABHD1	-0.744401	0.00016455	0.000458398
ABHD10	-0.271241	1.0443e-07	5.67298e-07
ABHD11	-0.558633	1.44588e-13	2.70773e-12
ABHD12	-0.234852	0.00745046	0.0144738
ABHD13	0.154683	0.00177154	0.00397238
ABHD14A	-0.436431	1.64656e-09	1.27934e-08
ABHD14B	-0.408037	1.52486e-08	9.70853e-08
ABHD17B	0.265489	4.02378e-07	1.93775e-06
ABHD2	0.246836	1.45867e-06	6.25668e-06
ABHD5	0.21701	0.000106466	0.000309017
ABHD6	0.272975	3.92284e-05	0.000124855
ABHD8	-0.19249	0.0262287	0.0447804
ABI1	0.227476	1.46029e-07	7.66163e-07
ABI2	-0.267938	5.37392e-05	0.00016647
ABI3BP	0.47302	0.0031823	0.00670734
ABL1	0.191097	3.76376e-06	1.48017e-05
ABL2	0.224524	0.000109237	0.000316296
ABLIM1	0.681628	7.02296e-17	2.8338e-15
ABLIM2	0.332409	0.00263171	0.00565185
ABLIM3	0.388643	6.63464e-06	2.47491e-05
ABR	0.334457	6.5157e-13	1.05273e-11
ABRACL	-0.374496	2.38276e-06	9.78348e-06
ABT1	-0.227513	2.43868e-07	1.22098e-06
ABTB2	0.344406	0.000185287	0.000509995
AC010255.2	-1.68568	0.000277867	0.000736338
AC010422.8	-0.401496	0.00554828	0.0110881
AC013394.1	-0.357088	0.00721647	0.0140661
AC040162.1	-0.346568	3.76631e-05	0.000120387
AC073111.3	-0.362759	0.0249475	0.042836
AC079447.1	-0.42742	3.95813e-07	1.90909e-06
AC090360.1	-1.16606	1.00614e-06	4.46234e-06
AC092835.1	0.233293	0.00149886	0.00342271
AC093323.1	-0.522616	4.48717e-14	9.50624e-13
AC096887.1	-0.265699	0.00470977	0.00956123
AC112128.1	-0.43081	0.000318991	0.000837097
AC114490.3	-0.326313	0.000534487	0.00133332
AC136428.1	1.29917	0.00174491	0.00391752
ACAA1	0.230447	0.00274781	0.0058674
ACACA	0.243737	6.58199e-07	3.02547e-06
ACAD10	-0.14169	0.00235835	0.00512738
ACAD11	0.146661	0.0149651	0.0271834
ACADS	-0.245458	0.0238762	0.0412135
ACADVL	-0.179098	0.00759079	0.0147373
ACAN	0.0252178	0.0295656	0.049847
ACAP2	0.110036	0.00109689	0.00257349
ACAT1	-0.346923	5.8518e-05	0.000179568
ACBD3	0.102926	0.00105172	0.00247643
ACBD4	-0.385938	0.000254041	0.000678714
ACBD5	0.252103	8.64995e-07	3.88367e-06
ACBD6	-0.491734	3.76474e-24	1.28132e-21
ACBD7	-0.658281	9.15487e-06	3.32549e-05
ACCS	-0.458664	2.40644e-05	8.0007e-05
ACD	-0.424129	3.21659e-13	5.55839e-12
ACE	0.30192	0.000255284	0.000681455
ACE2	0.198845	0.000275292	0.000729914
ACER1	1.67705	5.05242e-07	2.3804e-06
ACER2	0.392806	2.63027e-10	2.39695e-09
ACER3	0.201846	0.00160567	0.00363588
ACIN1	-0.0891574	0.00686028	0.0134457
ACKR1	0.402902	0.00517082	0.0104121
ACKR2	1.0553	1.13125e-13	2.17579e-12
ACKR4	0.428286	2.70344e-05	8.89181e-05
ACLY	0.122043	0.00759079	0.0147373
ACO2	0.105435	0.000152032	0.000427174
ACOT1	-0.291847	0.00811578	0.0156402
ACOT11	0.599948	2.31949e-10	2.14242e-09
ACOT2	-0.2749	2.95278e-05	9.62496e-05
ACOT4	-0.418102	0.00810077	0.0156151
ACOT8	-0.209914	0.000780652	0.00188319
ACOX1	0.30387	2.73323e-12	3.80031e-11
ACOX3	0.22971	0.000330778	0.000864263
ACOXL	0.101297	0.0239152	0.0412671
ACP1	-0.360106	1.27757e-17	6.28983e-16
ACP3	0.886348	7.38801e-11	7.59965e-10
ACP5	0.084911	0.000800333	0.00192858
ACP6	-0.563551	1.30047e-07	6.90642e-07
ACP7	0.931145	2.37908e-06	9.77352e-06
ACRV1	-0.177437	0.000548328	0.00136481
ACSBG1	-0.0975719	0.00104475	0.0024615
ACSF2	-0.349172	0.00273094	0.00584014
ACSF3	-0.254303	7.94357e-05	0.000237564
ACSL1	0.440178	3.89782e-09	2.80701e-08
ACSL4	0.204758	0.00107766	0.00253255
ACSL6	-0.777965	0.0249019	0.0427713
ACSM5	0.499498	0.00207652	0.00458016
ACSS1	-0.541813	3.40611e-06	1.35174e-05
ACSS3	-0.120092	0.0141113	0.0258122
ACTBL2	0.580849	0.000162345	0.0004529
ACTL6A	-0.207772	0.00370808	0.00769944
ACTN1	0.141839	0.0217808	0.0379986
ACTN4	0.344263	2.09917e-12	2.9986e-11
ACTR1A	0.0661089	0.0270851	0.0460967
ACTR1B	-0.138009	0.00117963	0.00274947
ACTR2	0.210123	1.4541e-06	6.24222e-06
ACTR3	0.126118	0.000145652	0.000410722
ACTR3B	-0.42452	6.0323e-09	4.17699e-08
ACTR5	-0.211601	0.000667096	0.00163521
ACTR6	-0.208506	3.10945e-06	1.24537e-05
ACVR1	0.160916	0.000153958	0.00043212
ACVR1B	0.186593	7.68465e-06	2.82685e-05
ACVRL1	0.200001	0.00347077	0.00726644
ACYP1	-0.581695	8.59326e-14	1.70299e-12
ACYP2	-0.0992413	0.00943475	0.0178935
ADA	-0.463477	0.000241915	0.000649977
ADA2	0.599486	6.69356e-06	2.49392e-05
ADAL	-0.134066	0.0084836	0.0162629
ADAM10	0.307669	2.14077e-09	1.62619e-08
ADAM11	-0.58737	0.00401546	0.00827403
ADAM12	0.302741	0.0226212	0.0392897
ADAM17	0.178879	2.62972e-05	8.66207e-05
ADAM19	0.0514047	0.0185595	0.0329779
ADAM23	-0.0756869	0.00695127	0.013607
ADAM32	-0.195765	0.0150986	0.0273942
ADAM33	0.436555	2.17684e-05	7.31344e-05
ADAM9	0.175859	0.000389119	0.00100017
ADAMTS12	0.349279	0.00460951	0.00937227
ADAMTS13	-0.728764	5.28148e-06	2.01087e-05
ADAMTS18	-0.41046	0.0023953	0.00519833
ADAMTS2	0.449522	0.00138053	0.00317333
ADAMTS3	0.130057	0.0110599	0.020685
ADAMTS5	-0.183496	0.0198472	0.0349959
ADAMTS7	0.251283	9.80396e-05	0.00028706
ADAMTS8	0.675887	0.00125144	0.00290089
ADAMTS9	0.120341	0.00557503	0.0111316
ADAMTSL1	0.134088	0.0042025	0.00862086
ADAMTSL2	0.118509	0.00745046	0.0144738
ADAMTSL3	-0.159645	0.0139403	0.0255322
ADAMTSL4	0.464626	1.92535e-06	8.04252e-06
ADAP1	-0.711978	1.90161e-06	7.95605e-06
ADAP2	0.569441	4.85212e-09	3.43888e-08
ADAR	0.224176	1.40717e-08	9.01421e-08
ADARB1	0.158445	0.0109613	0.0205202
ADARB2	-0.05991	0.0137816	0.0252681
ADAT1	0.241173	7.03784e-08	3.95068e-07
ADAT2	-0.392516	3.5744e-10	3.17598e-09
ADCK5	-0.469292	8.64995e-07	3.88367e-06
ADCY3	0.0814913	0.0200804	0.0353553
ADCY4	0.232243	0.0144339	0.0263224
ADCY6	0.130689	0.00169395	0.00381481
ADCY7	0.66705	1.66567e-16	6.15039e-15
ADCY9	0.378551	2.30408e-11	2.64075e-10
ADCYAP1	0.613646	1.18323e-05	4.20918e-05
ADCYAP1R1	0.118696	0.000467829	0.00118287
ADD1	0.161405	1.23252e-05	4.36175e-05
ADGRA2	0.563161	1.64609e-08	1.04042e-07
ADGRB3	-0.0910693	0.00572007	0.011395
ADGRD1	0.652578	0.000296786	0.000782894
ADGRE2	0.349949	7.41573e-07	3.376e-06
ADGRE3	0.482897	0.00173786	0.0039031
ADGRF1	-0.0242035	0.0117099	0.021786
ADGRF2	0.72168	2.79832e-08	1.68919e-07
ADGRF4	0.470759	2.39833e-08	1.47018e-07
ADGRF5	0.425912	8.12798e-09	5.46614e-08
ADGRG1	0.348538	4.87042e-09	3.45029e-08
ADGRG6	0.309356	0.00208917	0.00460547
ADGRL2	0.738113	3.97079e-16	1.32552e-14
ADGRL4	0.254216	0.000161083	0.000449781
ADH5	-0.275616	4.72498e-07	2.24029e-06
ADI1	-0.329639	3.22553e-07	1.58353e-06
ADIPOR1	0.264899	9.53126e-09	6.34175e-08
ADM2	-0.471606	0.0207599	0.0363961
ADM5	-0.521479	0.00557503	0.0111316
ADNP2	0.154948	0.00167237	0.00376945
ADO	-0.0949323	0.00198209	0.00439043
ADORA2B	-0.386541	2.4742e-05	8.19639e-05
ADPGK	-0.0974016	0.000241323	0.000648721
ADPRH	0.355123	1.36559e-06	5.89298e-06
ADPRM	-0.460586	9.01124e-14	1.77683e-12
ADRA2A	0.673235	9.71568e-05	0.000284901
ADRA2B	-0.51732	0.000225848	0.000611112
ADRB2	0.245319	0.000827913	0.0019874
ADRM1	-0.211618	3.68526e-05	0.00011811
ADSL	-0.23094	3.25454e-06	1.29652e-05
ADSS2	-0.208102	0.000102171	0.00029782
AFAP1L1	0.179584	0.0135562	0.0248956
AFAP1L2	0.286734	2.56501e-05	8.46674e-05
AFDN	0.537053	6.65039e-19	4.75427e-17
AFF1	0.420215	6.55535e-17	2.66573e-15
AFF3	-0.208736	9.48222e-10	7.70387e-09
AFF4	0.460777	1.82057e-16	6.5979e-15
AFMID	-0.463306	5.84236e-19	4.21511e-17
AFTPH	0.0880704	0.00524136	0.0105406
AGA	0.174213	0.00230978	0.00503438
AGAP2	0.258105	7.98264e-06	2.92616e-05
AGAP4	-0.226188	0.00241285	0.00523279
AGAP9	-0.334248	7.79952e-05	0.000233434
AGBL2	-0.352674	1.02749e-06	4.54804e-06
AGBL5	-0.39431	2.48821e-11	2.83312e-10
AGER	-0.558964	3.9712e-07	1.91479e-06
AGFG1	0.116226	0.00253578	0.00546834
AGL	0.149852	0.00354118	0.00739802
AGMAT	-0.389463	1.92448e-05	6.53572e-05
AGO2	0.136339	0.0026754	0.00573467
AGO4	0.129713	0.000490282	0.00123466
AGPAT3	0.153524	0.000618399	0.00152515
AGPAT5	-0.19082	0.0280549	0.0475457
AGPS	0.0828472	0.00534364	0.0107119
AGRN	0.27912	0.000226404	0.000612402
AHCY	-0.460702	3.7833e-13	6.4312e-12
AHCYL1	0.134027	2.73347e-05	8.97928e-05
AHCYL2	0.437305	9.96303e-13	1.52623e-11
AHDC1	0.28577	1.80264e-08	1.12844e-07
AHNAK	0.639744	2.10649e-20	2.29022e-18
AHNAK2	0.634749	5.33298e-14	1.10734e-12
AHSA1	-0.357893	6.7965e-11	7.03278e-10
AIDA	0.122009	0.00478394	0.00970172
AIFM1	-0.326392	2.73289e-11	3.08035e-10
AIFM2	-0.42155	8.34021e-06	3.0444e-05
AIFM3	-0.668822	1.42593e-05	4.95547e-05
AIMP1	-0.252049	4.24757e-10	3.70887e-09
AIMP2	-0.187466	0.00180578	0.00403759
AIP	-0.456023	1.99529e-10	1.87956e-09
AJAP1	0.670903	0.00096651	0.00229303
AJM1	-0.457518	1.39159e-06	5.99523e-06
AJUBA	0.147044	0.0206567	0.0362518
AK2	-0.237056	6.53754e-06	2.44101e-05
AK3	-0.0244944	0.0195509	0.0345356
AK5	0.174644	0.0175826	0.0313845
AK6	-0.401374	8.19435e-14	1.62806e-12
AK8	-0.69945	0.020047	0.0353083
AK9	0.219096	0.000671696	0.00164519
AKAP1	-0.298821	1.94622e-05	6.59524e-05
AKAP11	0.385047	5.15708e-14	1.07366e-12
AKAP12	0.324286	0.00216046	0.00474061
AKAP13	0.444508	1.53378e-15	4.47167e-14
AKAP5	0.308465	0.00210679	0.00464039
AKAP6	0.884719	6.09007e-06	2.29032e-05
AKAP7	-0.351592	0.00316943	0.00668291
AKAP8	-0.148028	1.19766e-05	4.25665e-05
AKAP8L	-0.272179	1.3232e-11	1.58988e-10
AKAP9	0.28531	1.21095e-08	7.88298e-08
AKIP1	-0.33301	0.000311468	0.000818866
AKNA	0.328719	2.23844e-05	7.50107e-05
AKR1A1	-0.258253	0.000400364	0.00102604
AKR1B1	-0.286152	0.0179739	0.0320099
AKR1B10	0.15874	0.00349176	0.00730452
AKR1B15	0.469278	2.85266e-07	1.4111e-06
AKR1E2	-0.620362	3.55367e-06	1.40496e-05
AKR7A2	-0.259139	0.00120581	0.00280342
AKR7A3	-1.07948	5.04396e-10	4.33892e-09
AKT2	0.200407	4.36688e-08	2.54061e-07
AKTIP	0.145836	0.00254102	0.00547814
AL031777.2	0.196586	0.000483298	0.00121805
AL135905.2	0.267579	0.001896	0.00422137
AL136531.2	0.950835	2.58416e-10	2.35767e-09
AL139353.1	-0.541665	2.59357e-05	8.55023e-05
AL355312.5	0.505743	4.97828e-07	2.34979e-06
AL357556.3	-0.238823	0.00617003	0.012226
AL365205.1	-0.348517	0.0110105	0.0206073
AL590560.2	1.55001	1.34203e-06	5.80247e-06
ALAD	0.146809	5.71348e-05	0.000175703
ALCAM	-0.338385	0.00542676	0.0108632
ALDH16A1	-0.240399	0.00571598	0.0113883
ALDH1A2	0.380074	3.33455e-06	1.32502e-05
ALDH1A3	0.537702	8.45676e-05	0.000251279
ALDH1B1	-0.205605	0.00846799	0.0162449
ALDH1L2	0.153058	0.0161463	0.0290626
ALDH3B2	0.9492	3.57131e-11	3.91269e-10
ALDH4A1	0.123283	0.00210679	0.00464039
ALDH8A1	-2.348	0.00461399	0.00938016
ALDH9A1	0.249906	2.40484e-06	9.85865e-06
ALDOC	-0.343688	0.00530252	0.010639
ALG10	-0.177544	0.000651975	0.00160065
ALG11	0.198449	2.50181e-05	8.27384e-05
ALG12	0.188181	4.16977e-06	1.62393e-05
ALG13	-0.113816	0.00166523	0.00375552
ALG1L2	-0.365764	0.000692702	0.00169267
ALG3	-0.339514	3.83254e-06	1.50457e-05
ALG5	-0.24502	1.8817e-05	6.40571e-05
ALG6	-0.125309	0.00684737	0.0134238
ALG9	0.115025	0.0247059	0.0424911
ALKAL2	-1.11747	0.0068168	0.0133806
ALKBH1	-0.195492	0.000372805	0.000962822
ALKBH2	-0.584027	2.93958e-15	8.03178e-14
ALKBH3	-0.241986	3.6553e-05	0.000117269
ALKBH4	-0.228377	4.03061e-05	0.000127921
ALKBH6	-0.410777	1.94939e-06	8.1364e-06
ALKBH7	-0.652281	3.22905e-08	1.92513e-07
ALKBH8	0.122208	0.00188006	0.00418934
ALOX12B	1.38542	3.02802e-08	1.81705e-07
ALOX15B	0.358899	0.00189606	0.00422137
ALOX5	0.344123	0.000148998	0.000419551
ALOX5AP	0.122562	0.0204177	0.0358685
ALOXE3	0.857584	8.45838e-07	3.80968e-06
ALPK1	0.156079	0.00192434	0.00427766
ALPK3	0.849384	4.04619e-06	1.58012e-05
ALPL	0.224541	0.000534487	0.00133332
ALS2CL	0.255815	0.0040075	0.0082598
ALX1	-1.1717	0.0175987	0.0314096
ALYREF	-0.576055	1.3558e-20	1.57232e-18
AMBRA1	0.203901	1.71282e-07	8.85307e-07
AMD1	0.155592	0.00397581	0.00819773
AMDHD2	-0.390807	0.00170849	0.00384367
AMFR	0.214393	4.25484e-07	2.04086e-06
AMH	-1.43469	1.98679e-07	1.0132e-06
AMMECR1	0.526478	1.42174e-14	3.36744e-13
AMN	-0.702059	0.00012009	0.000344284
AMOTL1	0.443939	2.72788e-10	2.48012e-09
AMOTL2	0.349221	1.24702e-08	8.08754e-08
AMPD1	0.996245	9.03269e-05	0.000266671
AMPD2	-0.172646	0.00194479	0.00431819
AMPD3	0.519874	6.4773e-12	8.34639e-11
AMPH	0.0832797	0.0220155	0.0383739
AMY2B	-0.803152	0.0151771	0.0275141
AMZ2	-0.274227	1.72878e-11	2.03656e-10
ANAPC10	-0.442957	3.93008e-15	1.05178e-13
ANAPC11	-0.683421	7.19529e-19	5.12043e-17
ANAPC15	-0.443471	2.50479e-07	1.25208e-06
ANAPC16	-0.373065	4.13506e-14	8.88045e-13
ANAPC2	-0.163819	0.0145345	0.0264841
ANAPC4	-0.0905972	0.000114103	0.000328987
ANAPC5	-0.155989	1.68959e-06	7.13961e-06
ANAPC7	-0.250693	1.08828e-07	5.88535e-07
ANG	-0.371479	0.00153481	0.00349666
ANGPT1	0.00267818	0.0139646	0.0255678
ANGPT2	0.264642	0.000657985	0.00161489
ANGPT4	0.392137	0.00023429	0.00063241
ANGPTL2	0.480887	9.23763e-05	0.000272055
ANGPTL7	0.179938	0.00410519	0.00844003
ANK1	-0.196739	0.00114385	0.00267284
ANK2	0.623435	0.00498366	0.0100663
ANK3	0.578438	3.00187e-16	1.04438e-14
ANKAR	-0.387217	9.73404e-07	4.3319e-06
ANKDD1A	-0.177241	0.0211772	0.0370695
ANKDD1B	-0.375313	0.000371917	0.000960689
ANKEF1	0.288129	2.98503e-08	1.79469e-07
ANKFY1	0.428044	4.25611e-14	9.11542e-13
ANKH	0.101898	0.014585	0.0265576
ANKHD1	-0.308087	8.97041e-06	3.26227e-05
ANKIB1	0.147406	9.30971e-05	0.000273971
ANKK1	0.207686	0.0291931	0.0492933
ANKLE1	-1.18314	1.20622e-07	6.44963e-07
ANKMY1	-0.218993	8.61224e-05	0.000255366
ANKMY2	-0.218175	1.94622e-05	6.59524e-05
ANKRD10	-0.28629	1.52629e-07	7.95723e-07
ANKRD11	0.219347	6.89223e-08	3.88007e-07
ANKRD12	0.301131	2.50542e-10	2.29385e-09
ANKRD13A	0.207653	1.84507e-07	9.47096e-07
ANKRD13B	-0.543185	1.13345e-08	7.41549e-08
ANKRD13C	0.227311	1.43829e-12	2.12232e-11
ANKRD13D	-0.174369	0.00269749	0.00577728
ANKRD16	-0.409006	6.27742e-10	5.29237e-09
ANKRD17	0.325216	1.38763e-11	1.65838e-10
ANKRD18A	-0.578655	8.59878e-05	0.000255063
ANKRD18B	-0.502887	0.00658725	0.0129707
ANKRD22	0.642654	1.35788e-10	1.32208e-09
ANKRD23	-0.59178	2.07394e-06	8.6058e-06
ANKRD24	-0.49434	0.00143236	0.00328474
ANKRD28	0.129296	0.00529228	0.0106239
ANKRD29	0.239071	0.000693552	0.00169369
ANKRD31	1.30667	4.41011e-07	2.10823e-06
ANKRD34B	-0.636019	0.0259156	0.0443135
ANKRD35	0.642187	9.42879e-07	4.21042e-06
ANKRD36	0.0556024	0.0238762	0.0412135
ANKRD36C	-0.418939	0.00217408	0.00476914
ANKRD39	0.121027	1.73153e-09	1.34003e-08
ANKRD44	0.316916	2.7945e-05	9.15477e-05
ANKRD50	0.308494	1.89244e-09	1.45093e-08
ANKRD52	0.153457	0.000500709	0.00125647
ANKRD54	-0.332116	5.60629e-11	5.91456e-10
ANKRD65	-0.362648	0.00817608	0.015737
ANKS1A	0.279528	7.15395e-10	5.9544e-09
ANKS3	-0.555635	2.67322e-10	2.43184e-09
ANKS6	-0.27719	4.50823e-06	1.74489e-05
ANKZF1	-0.311916	8.51909e-08	4.70624e-07
ANO1	0.161702	0.0107664	0.0201795
ANO10	0.219758	0.0026699	0.00572524
ANO2	0.298252	1.90833e-05	6.48509e-05
ANO5	0.968972	0.0180932	0.032215
ANO6	0.347379	9.81714e-09	6.51812e-08
ANO7	-0.431659	0.0037155	0.00771177
ANO8	0.201846	0.000475577	0.0012011
ANOS1	-0.0677316	0.014585	0.0265576
ANP32A	-0.430307	2.65886e-19	2.12383e-17
ANP32B	-0.538122	3.21956e-18	1.92387e-16
ANP32E	-0.207989	4.73859e-05	0.000148434
ANPEP	0.303882	0.00548987	0.0109797
ANTKMT	-0.649813	5.29045e-09	3.71923e-08
ANTXR1	0.356248	1.17382e-05	4.18045e-05
ANTXR2	0.441466	9.70206e-06	3.50393e-05
ANXA1	0.533301	7.94357e-05	0.000237564
ANXA13	0.354646	0.0117493	0.0218507
ANXA7	0.0851337	0.0156013	0.0281919
ANXA9	0.319222	0.000320601	0.000840478
AOC1	1.00841	4.05966e-12	5.465e-11
AOC2	-0.402822	8.7023e-05	0.000257841
AOC3	0.452805	0.000778886	0.00187951
AOX1	0.915237	3.73111e-13	6.35629e-12
AP001453.3	-0.764968	1.11071e-08	7.27893e-08
AP002495.1	-0.300252	0.00692516	0.013561
AP002990.1	-0.24519	0.0219974	0.0383466
AP003071.5	-0.92018	0.0295654	0.049847
AP003108.2	-0.271339	0.000493735	0.00124115
AP006621.6	-0.435567	0.000862172	0.00206205
AP1B1	0.256345	1.36133e-09	1.07478e-08
AP1G1	0.345496	1.90605e-17	8.7768e-16
AP1M2	-0.222552	0.000775363	0.00187245
AP1S1	-0.316707	8.43134e-07	3.79859e-06
AP2A1	0.212635	3.38733e-09	2.46775e-08
AP2S1	-0.420211	0.00259401	0.00558162
AP3B1	0.240383	8.4352e-09	5.66059e-08
AP3M1	0.10772	0.00372293	0.00772514
AP3M2	-0.489002	2.10608e-11	2.43521e-10
AP4B1	-0.354197	3.60599e-08	2.13442e-07
AP4E1	0.424067	9.19689e-17	3.59966e-15
AP4M1	-0.138023	0.00324081	0.00682238
AP5B1	0.110763	0.0107086	0.0200855
AP5M1	0.156533	2.09331e-05	7.05249e-05
APAF1	0.298658	1.1701e-06	5.1271e-06
APBA1	0.350634	9.44996e-08	5.17122e-07
APBA3	-0.132996	0.00401546	0.00827403
APBB1IP	0.327057	3.84904e-05	0.00012263
APBB2	0.147089	0.00639688	0.0126324
APBB3	-0.165301	0.0141852	0.0259383
APC	0.372462	3.46825e-15	9.34577e-14
APCDD1	0.628538	3.69433e-11	4.04182e-10
APELA	0.523258	9.47197e-07	4.22608e-06
APEX1	-0.357295	5.22149e-15	1.36931e-13
APH1A	-0.16507	1.02616e-08	6.78734e-08
APIP	-0.25339	1.30938e-07	6.94904e-07
APLNR	0.325096	0.0115443	0.0215112
APMAP	-0.226422	0.000450564	0.00114291
APOBEC3A	0.188273	2.46051e-05	8.16138e-05
APOBEC3F	-0.289268	0.0229577	0.0398167
APOC1	-0.566629	0.00760495	0.0147593
APOL1	0.32554	0.00647005	0.012756
APOL4	0.323179	0.00798157	0.0154081
APOL6	0.618161	2.61964e-10	2.38865e-09
APOLD1	0.284314	0.000523405	0.00130818
APOM	-0.3499	2.7777e-07	1.37706e-06
APOO	-0.300948	2.29529e-05	7.66369e-05
APOOL	0.245249	6.91392e-06	2.56929e-05
APP	0.219393	0.000329193	0.000860983
APPBP2	0.105021	0.00273094	0.00584014
APPL1	0.191889	2.27619e-05	7.60803e-05
APPL2	0.142429	0.000622685	0.00153403
APRT	-0.359814	0.00196129	0.00435174
APTX	-0.354575	1.93431e-07	9.88368e-07
AQP1	0.538956	6.92641e-09	4.73951e-08
AQP3	0.653384	9.16197e-07	4.09594e-06
AQP9	0.666966	0.00619356	0.0122665
AQR	0.267692	2.57378e-09	1.9234e-08
AR	-0.000182813	0.00338115	0.00709968
ARAP1	0.130493	0.000771856	0.00186513
ARAP2	0.607856	4.2172e-18	2.39219e-16
ARCN1	0.171235	5.43157e-05	0.00016809
AREL1	0.15533	1.77042e-06	7.459e-06
ARF3	0.102317	0.00763334	0.0148034
ARF5	-0.206635	0.00137156	0.00315643
ARF6	0.19937	0.000138119	0.000391665
ARFGAP1	-0.293692	0.00137753	0.00316738
ARFGEF1	0.277784	2.34757e-09	1.767e-08
ARFGEF2	0.383145	4.57263e-13	7.64841e-12
ARFIP1	0.109035	0.00211565	0.00465532
ARFIP2	-0.182599	0.00165458	0.00373365
ARFRP1	-0.31122	0.0246259	0.0423626
ARG1	1.33885	0.00104701	0.00246644
ARGLU1	-0.172355	0.000618399	0.00152515
ARHGAP1	0.353284	4.89213e-14	1.02532e-12
ARHGAP11B	-0.573266	9.91712e-08	5.40231e-07
ARHGAP15	0.115013	0.0034085	0.00715136
ARHGAP17	0.276131	4.61517e-12	6.13892e-11
ARHGAP18	0.195921	4.93318e-05	0.000154067
ARHGAP19	-0.254444	2.13469e-05	7.18107e-05
ARHGAP20	0.570643	1.19389e-07	6.38807e-07
ARHGAP21	0.295548	4.64835e-07	2.20931e-06
ARHGAP23	0.231712	6.94044e-08	3.9044e-07
ARHGAP25	0.290896	7.72979e-06	2.84146e-05
ARHGAP26	0.0781086	0.0209329	0.0366747
ARHGAP27	0.185591	1.63878e-05	5.64256e-05
ARHGAP28	0.165537	0.00165458	0.00373365
ARHGAP29	0.0988281	0.000727579	0.00176824
ARHGAP30	0.307828	3.67525e-05	0.000117837
ARHGAP31	0.609403	2.9007e-11	3.24381e-10
ARHGAP32	0.667367	4.03564e-18	2.32287e-16
ARHGAP33	-0.425463	0.00216046	0.00474061
ARHGAP35	0.248695	1.11094e-07	5.99959e-07
ARHGAP39	-0.254323	0.000841083	0.00201592
ARHGAP40	0.695618	0.0063605	0.0125638
ARHGAP42	0.355168	6.59848e-09	4.52897e-08
ARHGAP5	0.569822	1.04364e-14	2.53322e-13
ARHGAP6	0.35959	4.36194e-06	1.69246e-05
ARHGEF10	-0.400096	0.0003512	0.000912454
ARHGEF10L	0.653442	3.55816e-22	5.98996e-20
ARHGEF11	0.273655	1.83144e-10	1.74304e-09
ARHGEF12	0.575004	7.97998e-20	7.39258e-18
ARHGEF15	0.397258	3.00701e-06	1.20774e-05
ARHGEF16	-0.167087	0.0175231	0.0312996
ARHGEF17	0.140103	0.00403142	0.00830582
ARHGEF19	-0.26316	0.00127922	0.00296046
ARHGEF28	0.198252	0.0151509	0.027473
ARHGEF3	0.305384	1.05622e-09	8.52377e-09
ARHGEF37	0.650691	4.96294e-09	3.50789e-08
ARHGEF39	-0.450508	1.33648e-07	7.07605e-07
ARHGEF4	0.412541	1.38285e-07	7.29688e-07
ARHGEF6	0.504723	2.29689e-08	1.4102e-07
ARHGEF7	0.129084	0.00196543	0.00435847
ARID1A	0.313711	1.96252e-12	2.82141e-11
ARID1B	0.282738	3.13813e-12	4.30593e-11
ARID2	0.271089	1.77022e-08	1.10947e-07
ARID4A	0.202186	6.03139e-07	2.79785e-06
ARID4B	0.0591188	0.0180958	0.0322161
ARID5B	0.424959	5.81283e-14	1.19273e-12
ARIH1	0.159381	0.000354579	0.00092046
ARL11	0.1699	0.00929814	0.0176751
ARL14	0.755895	7.57152e-06	2.78967e-05
ARL14EP	-0.204867	8.00607e-05	0.000239159
ARL15	0.177591	0.000796721	0.00192106
ARL16	-0.659126	6.83934e-17	2.76684e-15
ARL2	-0.4664	0.000438007	0.00111431
ARL3	-0.582143	1.20864e-13	2.302e-12
ARL4A	-0.288108	0.00406351	0.00836313
ARL5A	0.229322	0.00083919	0.00201169
ARL5B	0.171941	9.70206e-06	3.50393e-05
ARL6IP1	-0.197889	6.65423e-06	2.48103e-05
ARL6IP4	-1.00289	2.07465e-13	3.73772e-12
ARL6IP5	0.0965291	0.0176722	0.0315265
ARL6IP6	-0.181939	0.00355542	0.00742578
ARL8B	0.128144	0.000764885	0.00185057
ARL9	-0.998526	2.01074e-06	8.36126e-06
ARMC10	-0.235235	3.65175e-06	1.44082e-05
ARMC12	-0.857111	2.44819e-08	1.49839e-07
ARMC2	-0.274017	1.61574e-05	5.56692e-05
ARMC6	-0.379122	6.16677e-13	1.0057e-11
ARMC7	-0.329706	1.18125e-06	5.17307e-06
ARMC9	-0.0993588	0.0250285	0.0429562
ARMCX3	-0.275079	0.0148913	0.0270682
ARMCX5	-0.180388	0.000134662	0.000382347
ARMCX6	-0.287369	0.00117963	0.00274947
ARMH3	0.197439	3.69365e-07	1.79422e-06
ARNT	0.180504	1.64011e-08	1.03748e-07
ARNTL2	0.27159	4.13e-05	0.000130757
ARPC1A	-0.526728	1.75396e-06	7.39763e-06
ARPC1B	-0.267982	4.17491e-05	0.000132125
ARPC3	-0.254885	8.97783e-05	0.000265302
ARPC5L	-0.290129	0.00924737	0.0175892
ARPIN	0.281159	2.58641e-08	1.57315e-07
ARPP19	0.177172	5.99242e-07	2.78225e-06
ARRB1	0.46865	5.59433e-10	4.76263e-09
ARRDC2	-0.33307	4.73859e-05	0.000148434
ARRDC3	0.344989	1.05151e-07	5.70818e-07
ARRDC4	0.86801	9.58461e-14	1.87806e-12
ARSA	0.103432	0.00362013	0.00754283
ARSB	0.247069	8.77042e-05	0.000259565
ARSD	0.243025	0.00133915	0.00308637
ARSG	0.0989991	0.0283696	0.0480272
ARSI	0.174181	0.00142	0.00325785
ARTN	-0.366484	0.00537468	0.0107659
ARV1	-0.165546	0.00264801	0.00568298
ARVCF	-0.247936	0.00432871	0.00885539
ASAH1	0.184642	0.000133302	0.00037883
ASAH2B	-0.214072	0.000594623	0.00146952
ASAP1	0.178199	7.40146e-05	0.000222841
ASAP2	0.342482	3.45813e-06	1.37099e-05
ASAP3	0.144753	0.00118482	0.00276035
ASB1	-0.174177	0.00155142	0.00353038
ASB13	-0.214309	0.00196958	0.00436644
ASB3	-0.17302	4.0219e-06	1.57142e-05
ASB6	-0.17457	0.00508139	0.0102518
ASB7	0.153486	2.92562e-06	1.17929e-05
ASB8	0.183468	7.57132e-08	4.21989e-07
ASB9	-0.637391	0.00186025	0.00414813
ASCC1	-0.180627	0.000695138	0.00169677
ASCC3	0.38218	5.19831e-11	5.52136e-10
ASF1B	-0.289822	1.06065e-06	4.68288e-06
ASGR1	-0.581837	0.00178668	0.00400175
ASGR2	0.0229651	0.0116683	0.021719
ASH1L	0.34415	1.8616e-10	1.76638e-09
ASIC1	-0.531387	0.000431852	0.00109972
ASIC3	-0.695357	1.36131e-06	5.8761e-06
ASNS	-0.482504	0.000101645	0.000296565
ASNSD1	-0.285335	8.31502e-08	4.60651e-07
ASPA	0.527535	2.19647e-05	7.36831e-05
ASPHD1	-0.965598	2.05373e-08	1.27188e-07
ASPRV1	1.01406	0.000979525	0.00232179
ASPSCR1	-0.666101	1.10481e-13	2.13279e-12
ASTL	0.0284786	0.00135661	0.00312324
ASXL2	0.304468	5.31219e-10	4.54717e-09
ATAD2B	0.15715	1.29774e-05	4.5575e-05
ATAD3A	-0.549237	2.90082e-08	1.74741e-07
ATAD3B	-0.600711	5.65245e-07	2.63927e-06
ATAD5	-0.156907	0.0241501	0.0416082
ATAT1	-0.450471	6.65602e-11	6.91484e-10
ATE1	0.196927	2.78697e-07	1.38122e-06
ATF4	-0.395307	4.97477e-12	6.56703e-11
ATF6	0.127898	9.67397e-06	3.49702e-05
ATF6B	0.109923	0.0163689	0.029416
ATF7	0.0739647	0.0168223	0.0301477
ATF7IP	0.285014	1.00889e-10	1.00863e-09
ATF7IP2	-0.35941	0.00070312	0.00171385
ATG101	-0.36997	1.06881e-13	2.07353e-12
ATG12	-0.162772	0.00232425	0.0050624
ATG14	0.0603022	0.0136752	0.0250818
ATG2A	0.331672	3.91968e-11	4.26157e-10
ATG2B	0.402496	2.27238e-18	1.4462e-16
ATG4A	0.163988	3.98573e-06	1.55807e-05
ATG4B	-0.316139	8.03168e-08	4.46693e-07
ATG5	-0.183497	4.23291e-06	1.64647e-05
ATG7	0.0645176	0.00792256	0.0153036
ATG9A	0.448833	1.7036e-14	3.96898e-13
ATG9B	0.697945	0.00236325	0.00513662
ATIC	-0.3643	6.2776e-11	6.56089e-10
ATL1	0.146723	0.00701692	0.013715
ATL3	0.257607	4.33611e-08	2.52552e-07
ATM	0.203012	0.000109799	0.000317865
ATMIN	0.243723	2.01983e-10	1.90039e-09
ATOH8	0.0101504	0.00919684	0.0174995
ATOX1	-0.436777	0.015521	0.0280564
ATP10A	0.202774	0.0186849	0.0331781
ATP10B	1.08585	3.3289e-14	7.30958e-13
ATP10D	0.536429	6.77288e-14	1.36821e-12
ATP11A	0.560008	6.01145e-12	7.80392e-11
ATP11B	0.449974	2.33747e-12	3.29096e-11
ATP12A	0.305637	0.000149354	0.000420308
ATP13A2	0.115445	0.0040075	0.0082598
ATP13A3	0.254479	0.000107015	0.000310437
ATP13A4	0.673666	0.00123794	0.00287129
ATP1A1	0.311232	1.25825e-06	5.46896e-06
ATP1A2	1.10481	0.00936608	0.0177807
ATP1B2	0.279185	0.000820473	0.00197135
ATP1B4	0.842099	0.0133219	0.0245057
ATP23	-0.285782	1.31915e-06	5.71934e-06
ATP2A2	0.377418	1.09625e-14	2.64859e-13
ATP2A3	0.212719	0.0136037	0.0249565
ATP2B2	-0.107349	0.0259254	0.044324
ATP2B4	0.403545	2.17583e-12	3.09118e-11
ATP2C1	0.175391	0.0089972	0.0171551
ATP2C2	0.285022	0.00591643	0.0117578
ATP5F1A	-0.193964	0.00358405	0.00747859
ATP5F1B	-0.214343	1.01622e-05	3.65829e-05
ATP5F1C	-0.341358	6.77314e-09	4.64071e-08
ATP5F1D	-0.686335	8.37753e-07	3.77761e-06
ATP5F1E	-0.719045	9.93522e-15	2.44954e-13
ATP5IF1	-0.424338	9.19252e-08	5.04976e-07
ATP5MC1	-0.612185	3.75548e-14	8.12097e-13
ATP5MC2	-0.435659	5.48869e-18	3.00458e-16
ATP5MC3	-0.447939	3.62884e-13	6.20909e-12
ATP5MD	-0.606571	6.33888e-13	1.02841e-11
ATP5ME	-1.30058	2.41304e-16	8.56656e-15
ATP5MF	-0.698701	3.95031e-16	1.3215e-14
ATP5MG	-0.70213	1.39967e-11	1.67022e-10
ATP5MPL	-0.679082	3.98942e-15	1.06403e-13
ATP5PB	-0.210586	0.000177157	0.000489944
ATP5PD	-0.451189	1.13145e-12	1.70163e-11
ATP5PF	-0.49418	1.20008e-10	1.17869e-09
ATP5PO	-0.949941	3.31277e-16	1.13739e-14
ATP6AP1L	-0.327517	0.00760495	0.0147593
ATP6AP2	0.0425864	0.0191297	0.0338679
ATP6V0A1	0.312585	1.18748e-11	1.44229e-10
ATP6V0A4	0.621728	2.25412e-06	9.29922e-06
ATP6V0B	-0.374856	3.52154e-06	1.39402e-05
ATP6V0D1	0.120429	0.000158276	0.000443128
ATP6V0E1	-0.160515	0.0217449	0.0379402
ATP6V1A	0.343387	2.27472e-11	2.60901e-10
ATP6V1B2	0.248337	2.38222e-07	1.19424e-06
ATP6V1D	0.144588	0.0227702	0.0395135
ATP6V1E2	-0.302059	0.000385437	0.000991686
ATP6V1F	-0.113679	0.0212123	0.0371268
ATP7A	0.515517	4.83815e-18	2.71491e-16
ATP7B	0.214091	0.0190656	0.0337735
ATP8A1	0.355031	9.64597e-06	3.4885e-05
ATP8B1	0.182591	0.00642118	0.0126756
ATP8B2	0.108226	0.00706985	0.0138064
ATP8B4	0.255925	0.000130621	0.000372022
ATP9A	0.60332	1.40851e-16	5.30085e-15
ATP9B	0.253181	2.60505e-08	1.58326e-07
ATPAF1	-0.156071	0.000644535	0.00158412
ATPAF2	-0.273913	5.12648e-06	1.95804e-05
ATPSCKMT	-0.237746	0.00385899	0.00797471
ATR	0.104475	0.0232224	0.0402045
ATRAID	-0.409145	3.90967e-16	1.3107e-14
ATRIP	-0.378805	5.24502e-07	2.46373e-06
ATRN	0.15348	0.000492581	0.00123865
ATRX	0.247602	8.54863e-08	4.71923e-07
ATXN1	0.484429	2.19064e-19	1.80509e-17
ATXN10	-0.208483	6.28568e-09	4.33518e-08
ATXN1L	0.375882	8.31207e-14	1.64935e-12
ATXN7	0.300295	1.4324e-10	1.39117e-09
ATXN7L1	0.0957703	0.000192328	0.000528169
ATXN7L2	-0.254458	6.3194e-05	0.000192746
ATXN7L3	0.178924	4.39668e-07	2.10246e-06
ATXN7L3B	0.0494807	0.00857786	0.0164356
AUNIP	-0.451975	1.38763e-11	1.65838e-10
AUP1	-0.312036	4.38657e-13	7.40045e-12
AURKA	-0.334276	1.23961e-05	4.38486e-05
AURKAIP1	-0.626499	8.43104e-08	4.65924e-07
AURKB	-0.715007	3.16669e-18	1.90684e-16
AURKC	-0.708892	0.000252803	0.000676099
AVEN	-0.177925	0.0181264	0.0322595
AVPR1A	0.720447	2.25523e-12	3.18952e-11
AXDND1	-0.761154	1.12403e-05	4.02234e-05
AXIN1	-0.134571	0.00219694	0.00481053
AXIN2	0.0416173	5.54862e-05	0.000171441
AZI2	0.0748459	0.0130662	0.0240721
AZIN1	-0.160124	0.0154676	0.0279761
AZIN2	-0.279996	0.0049067	0.00992241
B3GALNT1	-0.469028	1.68103e-05	5.78168e-05
B3GALNT2	-0.127612	0.00336076	0.00705972
B3GALT2	-0.832625	0.00858727	0.0164516
B3GALT4	0.165999	0.00443214	0.00904688
B3GALT6	-0.390076	0.000171496	0.000476053
B3GAT3	-0.411823	2.21288e-07	1.11758e-06
B3GLCT	0.115511	0.0107086	0.0200855
B3GNT10	0.0874443	0.00517082	0.0104121
B3GNT2	0.190461	4.23171e-05	0.000133761
B3GNT5	0.413771	2.9005e-07	1.4334e-06
B3GNT6	0.497341	0.00403385	0.00830973
B3GNT8	0.345616	9.28562e-05	0.000273365
B3GNT9	0.309762	1.85757e-07	9.52576e-07
B3GNTL1	-0.411908	9.56327e-13	1.47655e-11
B4GALNT4	-1.25264	1.95544e-06	8.14863e-06
B4GALT1	0.160496	0.00189606	0.00422137
B4GALT2	-0.22692	0.00379041	0.00784229
B4GALT3	-0.229561	1.38285e-07	7.29688e-07
B4GALT7	-0.320452	3.57653e-05	0.000114954
B9D1	-0.59189	2.79488e-12	3.87227e-11
B9D2	-0.44402	3.52154e-06	1.39402e-05
BABAM1	-0.845421	1.30972e-24	5.00122e-22
BABAM2	-0.148553	0.0196164	0.0346357
BACE1	0.205158	0.000366634	0.000948295
BACH1	0.418403	7.07571e-13	1.13269e-11
BAD	-0.443062	3.29027e-07	1.61178e-06
BAG1	-0.412027	0.00682161	0.0133834
BAG2	-0.626808	2.87171e-07	1.42007e-06
BAG3	0.149425	0.000112651	0.00032534
BANF1	-0.494719	7.96041e-18	4.11314e-16
BANK1	-0.0528287	0.0125476	0.0232123
BANP	-0.165258	1.75872e-05	6.02374e-05
BARX2	0.041989	0.0226956	0.0393884
BATF2	0.390987	0.00109932	0.00257803
BATF3	-0.54781	0.000522187	0.00130555
BAX	-0.483054	4.25611e-14	9.11542e-13
BAZ1A	0.109173	0.0239542	0.0413207
BAZ2A	0.321299	3.2955e-12	4.50606e-11
BAZ2B	0.271128	3.07162e-08	1.8425e-07
BBC3	-0.573386	2.49528e-10	2.28725e-09
BBIP1	-0.155689	0.00208917	0.00460547
BBOX1	0.772592	6.1004e-09	4.22227e-08
BBS1	-0.246425	0.000144918	0.000408947
BBS10	0.0939572	0.00202004	0.00446755
BBS5	-0.30898	3.54741e-05	0.000114112
BBX	0.206417	9.21372e-05	0.000271402
BCAP31	-0.197782	0.0125698	0.0232396
BCAS1	0.363542	6.67985e-05	0.000202831
BCAS2	-0.269114	1.85627e-09	1.42529e-08
BCAS4	-0.69962	7.17547e-11	7.40047e-10
BCAT2	-0.351212	1.69552e-07	8.7723e-07
BCCIP	-0.390171	3.21956e-18	1.92387e-16
BCDIN3D	-0.182597	0.0294254	0.0496374
BCKDHA	-0.438365	0.00144949	0.00332064
BCL11A	-0.362057	0.0124593	0.0230571
BCL11B	0.308634	6.03624e-06	2.27281e-05
BCL2L12	-0.534529	1.2681e-16	4.86601e-15
BCL2L13	0.0925769	0.0187164	0.0332226
BCL2L2	0.203902	2.48797e-05	8.23677e-05
BCL7B	-0.170164	0.00190813	0.00424584
BCL7C	-0.593709	1.84389e-11	2.15755e-10
BCL9	0.137655	0.0023731	0.00515372
BCL9L	0.576739	9.41125e-15	2.33877e-13
BCO1	0.247936	0.0110444	0.020661
BCOR	0.351339	4.88064e-11	5.20513e-10
BCORL1	0.0923382	0.0240324	0.0414282
BCS1L	-0.459893	8.07452e-16	2.51822e-14
BDH2	-0.322795	6.9343e-06	2.57625e-05
BDKRB2	0.363908	9.71437e-08	5.29924e-07
BDP1	0.280876	1.65811e-08	1.04675e-07
BEAN1	0.412945	6.5185e-07	3.00069e-06
BECN1	0.130984	0.000200116	0.00054773
BEST4	-0.801368	7.01385e-10	5.85335e-09
BET1	-0.297943	7.26186e-08	4.06332e-07
BET1L	-0.115153	0.0114418	0.021333
BEX2	-0.832099	0.00133188	0.00307098
BEX3	-0.30925	0.000266087	0.000707516
BFAR	-0.187719	8.48549e-07	3.82079e-06
BHLHA15	0.663368	0.00188205	0.00419317
BHLHE22	0.539929	4.57581e-05	0.000143709
BHLHE40	0.206882	5.74395e-05	0.000176536
BHMT2	0.341416	0.00377531	0.00781727
BICC1	0.399768	0.000310718	0.000817169
BICD2	0.464159	3.00107e-11	3.35127e-10
BICDL2	0.500816	7.77915e-05	0.000232913
BICRAL	0.336394	1.30615e-11	1.573e-10
BID	-0.391005	2.74908e-08	1.66369e-07
BIK	-0.528963	6.95473e-06	2.57956e-05
BIN2	0.245807	0.000717702	0.0017464
BIN3	-0.141074	0.00450233	0.009177
BIRC5	-0.683968	6.46583e-19	4.64354e-17
BIRC6	0.282197	1.41532e-09	1.1146e-08
BIVM	-0.289707	1.98598e-06	8.26708e-06
BLCAP	-0.137881	0.0120047	0.0222685
BLM	-0.260402	0.00357687	0.0074666
BLMH	-0.303712	4.62535e-05	0.000145119
BLNK	0.683218	1.3664e-13	2.57739e-12
BLOC1S1	-0.902565	2.26824e-13	4.04e-12
BLOC1S4	-0.279583	1.4957e-06	6.39802e-06
BLOC1S5	-0.160378	0.000238969	0.000643609
BLVRA	-0.243314	0.000110932	0.000320966
BLZF1	0.321364	1.1877e-09	9.47253e-09
BMF	0.222494	0.00274218	0.00585856
BMI1	-0.157625	0.0258927	0.0442793
BMP2	0.296528	1.44638e-05	5.0243e-05
BMP2K	0.734189	3.80605e-22	6.3391e-20
BMP4	-0.003927	0.000102435	0.000298532
BMP6	0.399236	4.37505e-06	1.69628e-05
BMPR2	0.429789	3.4174e-16	1.16564e-14
BMS1	-0.167766	0.000158674	0.000443996
BMX	0.0990136	0.00046237	0.00117001
BNC1	0.314894	2.28254e-05	7.626e-05
BNC2	0.184068	0.0134145	0.0246558
BNIP1	-0.490358	5.13243e-14	1.07281e-12
BNIP2	0.0980158	0.00455563	0.00927598
BNIP3L	0.126413	0.0103672	0.0194989
BNIPL	0.683264	2.61349e-09	1.94935e-08
BOC	0.436422	1.02996e-08	6.80667e-08
BOD1	-0.55707	4.56837e-25	1.88217e-22
BOD1L1	0.28214	3.63234e-10	3.22015e-09
BOLA1	-0.587199	1.13773e-09	9.1205e-09
BOLA2B	-0.685605	8.65282e-08	4.77338e-07
BOLA3	-0.560492	3.61482e-18	2.1117e-16
BOP1	-0.57625	3.46909e-07	1.69302e-06
BORA	-0.220637	0.0273466	0.0464964
BORCS8	-0.360792	8.05959e-08	4.4745e-07
BPGM	0.199051	0.00167954	0.00378506
BPHL	-0.23627	6.19911e-06	2.3263e-05
BPIFC	1.63873	5.54573e-13	9.1106e-12
BPNT1	-0.113875	0.00160223	0.00362861
BPTF	0.257818	1.11689e-08	7.31329e-08
BRAF	0.126211	0.000436975	0.00111186
BRAT1	-0.326934	4.9062e-08	2.83332e-07
BRCA1	-0.226522	0.00179048	0.0040097
BRD1	0.15517	3.20626e-05	0.000103842
BRD3	0.132172	0.0190976	0.0338188
BRD3OS	-0.175223	0.00864121	0.0165488
BRD8	-0.195232	0.000436975	0.00111186
BRD9	-0.25823	1.26621e-06	5.50051e-06
BRF1	-0.14033	0.000390973	0.00100411
BRI3	-0.413069	1.50057e-07	7.84405e-07
BRICD5	-0.835549	9.0958e-11	9.17551e-10
BRINP1	0.83698	0.0001587	0.000443996
BRIP1	-0.151085	0.0231465	0.0400916
BRIX1	-0.523171	1.81573e-17	8.4857e-16
BRK1	-0.218488	0.000650481	0.00159773
BRMS1	-0.336851	0.0117099	0.021786
BRMS1L	-0.142222	0.0214594	0.0375132
BROX	0.101819	9.77867e-05	0.000286534
BRPF1	0.0916037	0.00197791	0.00438304
BRPF3	0.191863	6.59564e-06	2.46153e-05
BRSK1	-0.579475	0.0236051	0.0408039
BRWD1	0.172756	0.000141301	0.000399749
BRWD3	0.196904	3.94418e-05	0.000125457
BSDC1	0.0622539	0.00674486	0.0132544
BSG	-0.18263	0.00845239	0.016221
BSPRY	0.551691	2.19515e-05	7.36546e-05
BTAF1	0.264112	2.47153e-07	1.23624e-06
BTBD11	0.353286	6.00921e-05	0.000184146
BTBD2	-0.263614	8.7613e-07	3.92916e-06
BTBD3	0.104715	0.000879791	0.00210034
BTBD6	-0.20251	0.0002209	0.000598756
BTBD7	0.347332	3.1137e-13	5.39249e-12
BTBD9	0.418125	2.5265e-14	5.75763e-13
BTD	0.136921	0.00375278	0.00777884
BTF3	-0.305779	1.1898e-07	6.3684e-07
BTF3L4	-0.109644	0.0130892	0.0241116
BTG2	0.108278	8.43476e-05	0.000250673
BTG3	-0.118495	0.0262287	0.0447804
BTK	0.207316	0.000480057	0.00121046
BTLA	0.319489	4.52678e-05	0.000142343
BTN2A1	-0.14766	0.002982	0.00632175
BTN3A1	0.184134	0.00364194	0.0075812
BTN3A2	0.173483	0.00605357	0.0120135
BTN3A3	0.24342	0.00217863	0.00477779
BTRC	0.268697	2.38388e-09	1.79346e-08
BUB1	-0.313547	1.34429e-06	5.81065e-06
BUB3	-0.245545	4.21512e-08	2.46147e-07
BUD13	-0.222655	1.14972e-07	6.17706e-07
BUD23	-0.45901	6.3786e-16	2.03388e-14
BUD31	-0.431647	1.34871e-17	6.59856e-16
BVES	0.284446	0.0136037	0.0249565
BYSL	-0.342319	5.82126e-10	4.93169e-09
BZW1	0.224815	2.48797e-05	8.23677e-05
BZW2	-0.410169	1.33794e-12	1.98736e-11
C10orf99	1.15104	9.8728e-13	1.51538e-11
C11orf1	-0.439512	6.27039e-07	2.8967e-06
C11orf16	-1.15844	0.00328614	0.00691224
C11orf21	0.0241357	0.0041859	0.00858912
C11orf49	-0.316444	1.12243e-07	6.05125e-07
C11orf58	-0.128673	0.0127708	0.0235862
C11orf68	-0.138685	0.00733988	0.0142803
C12orf43	-0.166386	0.000392834	0.0010084
C12orf45	-0.549494	1.47618e-22	2.68733e-20
C12orf57	-1.17277	1.30444e-22	2.43123e-20
C12orf60	-0.421976	1.55771e-07	8.11566e-07
C12orf65	-0.240825	1.02764e-09	8.32321e-09
C12orf73	-0.555702	2.72788e-18	1.66827e-16
C12orf76	-0.45048	1.54157e-15	4.48604e-14
C14orf119	-0.199145	0.00603052	0.0119723
C14orf93	-0.338921	1.1206e-13	2.16061e-12
C15orf39	0.232223	5.82004e-07	2.71348e-06
C15orf40	-0.175898	0.00156819	0.00356181
C15orf61	-0.53668	2.7917e-11	3.14212e-10
C15orf62	0.110257	0.0107664	0.0201795
C16orf54	0.458783	1.18499e-06	5.18654e-06
C16orf70	0.221502	1.51931e-06	6.48836e-06
C16orf72	0.192712	1.25391e-05	4.42941e-05
C16orf74	-0.554615	1.40036e-06	6.02969e-06
C16orf86	-0.574453	0.000780652	0.00188319
C16orf91	-0.380214	1.33192e-07	7.05433e-07
C16orf95	-0.71592	3.12124e-09	2.29634e-08
C17orf100	-0.339284	6.37264e-07	2.93787e-06
C17orf113	-0.31678	0.0126142	0.0233162
C17orf49	-0.495518	3.85573e-06	1.51254e-05
C17orf58	-0.265218	1.24317e-05	4.39447e-05
C17orf67	-0.479035	2.57911e-12	3.61491e-11
C17orf75	-0.408663	5.48764e-15	1.42715e-13
C17orf80	-0.128115	0.013723	0.0251667
C17orf97	-0.384171	0.0201475	0.0354574
C18orf21	-0.397528	2.41433e-07	1.20917e-06
C18orf25	0.162432	0.000309223	0.000813921
C19orf18	-1.02103	1.05412e-08	6.94874e-08
C19orf25	-0.400113	2.76912e-06	1.12082e-05
C19orf44	-0.359819	8.1174e-10	6.67118e-09
C19orf53	-0.459043	3.16925e-15	8.58438e-14
C19orf54	-0.190691	0.000106193	0.000308395
C19orf73	-0.436429	0.000118566	0.000340102
C1D	-0.292333	4.87175e-08	2.81655e-07
C1GALT1C1	-0.181641	0.000837301	0.00200778
C1GALT1C1L	-0.916699	0.00025673	0.000684846
C1orf109	-0.1275	0.00571598	0.0113883
C1orf112	-0.294123	1.35845e-05	4.75155e-05
C1orf116	0.53046	8.44363e-10	6.92113e-09
C1orf122	-0.518894	2.64488e-06	1.07414e-05
C1orf131	-0.254096	4.85012e-07	2.29337e-06
C1orf159	-0.277928	0.00114133	0.00266776
C1orf174	-0.218365	1.0647e-08	7.00667e-08
C1orf198	0.145609	2.55083e-05	8.42528e-05
C1orf21	0.124658	0.0043032	0.00880895
C1orf210	0.228356	0.00798157	0.0154081
C1orf216	-0.244709	6.10812e-06	2.29546e-05
C1orf35	-0.542234	4.81662e-17	2.01628e-15
C1orf43	-0.214848	1.68407e-07	8.72174e-07
C1orf50	0.230512	3.26444e-06	1.2998e-05
C1orf52	-0.283483	3.13133e-11	3.47936e-10
C1orf53	-0.614089	1.22435e-08	7.95702e-08
C1orf54	-0.447407	2.48797e-05	8.23677e-05
C1orf56	-0.282425	0.00278183	0.00592711
C1orf68	1.56283	2.08291e-08	1.28888e-07
C1QBP	-0.474461	5.15475e-13	8.54902e-12
C1QL1	-0.365166	0.025851	0.0442176
C1QL3	0.233244	0.00784523	0.0151673
C1QL4	-1.17298	4.19361e-05	0.000132664
C1QTNF12	-1.15345	0.000455895	0.00115493
C1QTNF2	0.0324467	0.000763152	0.00184695
C1QTNF3	-0.492436	0.0138675	0.0254049
C1QTNF7	0.797721	5.44035e-06	2.06306e-05
C1S	0.228054	0.00122984	0.00285377
C20orf194	0.173012	0.000994915	0.00235435
C20orf202	0.126433	0.0181264	0.0322595
C20orf204	-0.992546	3.37019e-08	2.00394e-07
C20orf27	-0.614067	1.50473e-10	1.45151e-09
C20orf96	-0.623862	5.91521e-07	2.75211e-06
C21orf58	-0.397825	3.44299e-08	2.04567e-07
C22orf23	0.237849	0.000877817	0.00209626
C22orf39	-0.31587	1.37161e-08	8.80804e-08
C2CD2	0.213265	0.017375	0.0310528
C2CD2L	0.219361	1.56615e-05	5.40915e-05
C2CD3	0.093677	0.003527	0.00737035
C2CD4A	-0.200984	0.000460202	0.00116509
C2CD4D	-0.437626	0.00115143	0.00268775
C2orf15	-0.460992	0.00644558	0.0127141
C2orf16	0.121917	0.019715	0.0347981
C2orf49	-0.170217	9.59018e-06	3.47073e-05
C2orf50	-0.232985	0.00275859	0.00588719
C2orf68	-0.229904	3.14752e-06	1.25837e-05
C2orf69	0.103404	0.000866059	0.00207071
C2orf74	-0.296696	0.0279396	0.0473811
C2orf76	-0.34861	5.50604e-06	2.08672e-05
C2orf81	-0.554066	0.000140588	0.000397947
C2orf92	-0.0129619	0.0161187	0.0290162
C3AR1	0.195194	0.0190336	0.0337283
C3orf33	-0.765887	4.41575e-09	3.15388e-08
C3orf70	0.57735	0.00669413	0.013158
C4A	0.544219	0.000344126	0.000895552
C4B	0.60024	1.96819e-05	6.66679e-05
C4orf46	-0.200535	0.00880143	0.0168289
C4orf47	-0.410412	0.011867	0.0220496
C4orf48	-1.11941	3.18497e-11	3.53645e-10
C4orf50	0.570864	0.000182708	0.000503695
C4orf54	1.10782	0.00113805	0.00266088
C5AR2	0.544239	6.7329e-05	0.000204402
C5orf15	-0.144999	0.0232224	0.0402045
C5orf34	-0.400318	1.61148e-07	8.37628e-07
C5orf38	-0.88716	2.95251e-06	1.1889e-05
C5orf51	0.172803	0.000111502	0.000322378
C5orf63	-0.211597	0.00253578	0.00546834
C6orf120	0.165997	1.08602e-05	3.89526e-05
C6orf132	0.705537	1.58326e-14	3.7107e-13
C6orf136	-0.322168	1.64609e-08	1.04042e-07
C6orf163	-0.368445	8.97783e-05	0.000265302
C6orf226	-0.294944	0.00151837	0.00346323
C6orf52	-0.79943	4.227e-07	2.02876e-06
C6orf62	0.118766	0.0143589	0.0262191
C6orf89	0.160954	8.40189e-08	4.64477e-07
C7orf25	-0.154536	0.0121977	0.0226077
C7orf26	-0.311369	1.50623e-11	1.79055e-10
C7orf50	-0.586179	2.58641e-08	1.57315e-07
C7orf57	0.13895	0.00210678	0.00464039
C7orf61	-0.68408	5.10733e-05	0.000158986
C8G	-1.52267	9.11867e-05	0.000268804
C8orf33	-0.342795	1.91893e-12	2.76637e-11
C8orf58	-0.296382	1.40176e-05	4.88122e-05
C8orf76	-0.742396	6.94485e-18	3.68572e-16
C8orf82	-0.469638	2.88838e-11	3.23466e-10
C9orf116	-0.567426	6.75422e-07	3.09646e-06
C9orf152	-0.355934	0.00645437	0.0127299
C9orf16	-0.470438	1.58851e-05	5.48033e-05
C9orf24	-0.40952	1.68366e-07	8.72174e-07
C9orf40	-0.311181	2.95278e-05	9.62496e-05
C9orf43	-0.339093	3.83861e-05	0.000122373
C9orf78	-0.252758	2.20757e-08	1.35963e-07
CA12	0.373213	5.02058e-06	1.92558e-05
CA2	0.325817	0.00022752	0.000614996
CA5B	0.0592306	0.00525151	0.0105529
CA9	-0.512429	0.0135799	0.0249275
CAB39	0.307611	8.16556e-07	3.6884e-06
CABYR	-0.940324	4.4301e-11	4.7603e-10
CACNA1C	0.395405	6.98898e-08	3.92606e-07
CACNA1G	0.144874	3.89357e-07	1.88141e-06
CACNA2D4	-0.306143	0.0232224	0.0402045
CACNB1	0.316305	0.0099451	0.0187749
CACTIN	-0.119251	0.000226404	0.000612402
CACUL1	0.110585	0.00131889	0.00304282
CACYBP	-0.467134	5.94377e-22	9.59337e-20
CAD	-0.158418	0.0268257	0.0456999
CADM3	0.31099	0.0252319	0.0432769
CAGE1	-0.346089	0.00159195	0.00360845
CALCOCO1	0.317363	5.18671e-10	4.44949e-09
CALCOCO2	0.0978487	0.0119834	0.0222369
CALCRL	0.355819	4.97845e-07	2.34979e-06
CALD1	0.16459	0.0101634	0.0191547
CALHM5	0.534797	4.27123e-06	1.66055e-05
CALM1	0.26821	1.36411e-07	7.21262e-07
CALM2	-0.388002	2.09101e-18	1.3362e-16
CALML3	0.414086	2.7868e-05	9.13337e-05
CALML5	0.226759	0.00924737	0.0175892
CALML6	-0.589937	8.40248e-05	0.000249904
CALU	0.0504847	0.0282794	0.0479003
CAMK1D	0.074218	0.00480264	0.00973083
CAMK2A	0.788056	0.000183451	0.000505474
CAMK2D	0.271325	6.46084e-06	2.41468e-05
CAMK2N2	-0.386721	0.000395642	0.00101527
CAMKMT	-0.323838	1.6531e-06	7.00052e-06
CAMLG	-0.299747	2.52026e-11	2.86337e-10
CAMSAP1	0.306405	6.05716e-10	5.11493e-09
CAMSAP2	0.236662	6.2914e-06	2.35754e-05
CAMTA1	-0.330008	4.21369e-10	3.68339e-09
CAMTA2	0.268041	1.47409e-11	1.75367e-10
CAND1	0.0611361	0.0109417	0.0204908
CANX	0.0813675	0.0125698	0.0232396
CAP1	0.22219	1.16709e-05	4.15932e-05
CAP2	0.423911	0.000391903	0.00100617
CAPN1	0.243204	1.68433e-06	7.12123e-06
CAPN10	-0.33333	2.81177e-06	1.13632e-05
CAPN11	-0.143078	0.00465484	0.0094583
CAPN13	-0.984589	0.0173614	0.0310392
CAPN14	0.393128	0.0141852	0.0259383
CAPN2	0.175278	9.11867e-05	0.000268804
CAPN3	0.446317	0.00805588	0.0155362
CAPN5	0.387943	0.000565117	0.00140191
CAPN6	-1.21377	0.00374403	0.00776482
CAPN7	0.134151	0.000297504	0.000784657
CAPN8	-0.742873	0.00198657	0.00439975
CAPNS2	0.123666	0.000425777	0.00108602
CAPRIN2	-0.264398	0.00220154	0.0048179
CAPS	-0.941442	6.62465e-07	3.04329e-06
CAPZA1	0.130034	0.00196543	0.00435847
CAPZA2	0.0818398	0.00138653	0.00318573
CARD14	0.488551	1.34007e-06	5.7956e-06
CARD18	0.331746	4.7704e-05	0.000149341
CARD19	-0.237164	0.000757973	0.00183583
CARD6	0.679092	9.27156e-14	1.82356e-12
CARHSP1	0.190445	0.00263713	0.00566195
CARM1	0.115832	0.00727152	0.0141631
CARMIL1	0.270965	9.54829e-08	5.21955e-07
CARNMT1	0.108112	0.019453	0.0343898
CARS1	-0.23559	0.000121943	0.000349277
CARS2	-0.270695	2.62872e-06	1.06814e-05
CASK	0.144481	0.000986094	0.00233595
CASKIN2	0.189142	4.10391e-07	1.97391e-06
CASP10	0.399263	2.17594e-08	1.34226e-07
CASP14	0.33741	1.16706e-05	4.15932e-05
CASP3	-0.128979	0.0279209	0.0473545
CASP4	0.193268	0.000475577	0.0012011
CASP5	0.299334	0.00278752	0.00593604
CASP6	-0.196347	7.45992e-05	0.000224385
CASP7	0.186475	0.000249733	0.000669261
CASP8AP2	0.154047	0.00396793	0.00818362
CASS4	0.655434	1.83893e-10	1.74805e-09
CAST	0.234096	3.88077e-07	1.87639e-06
CASZ1	0.549205	7.52343e-17	3.02794e-15
CAT	0.217911	0.000411912	0.00105288
CATSPER2	-0.255757	0.00631244	0.0124751
CATSPER3	-1.01468	6.84021e-05	0.000207379
CATSPERB	0.394294	0.00187211	0.00417221
CATSPERE	-0.420044	3.28932e-06	1.3087e-05
CATSPERG	-0.311266	0.00427782	0.00876274
CAVIN1	0.103147	0.019453	0.0343898
CAVIN2	-0.513315	0.0199802	0.0352065
CAVIN3	-0.372728	0.0248668	0.0427175
CBFA2T3	-0.060038	0.0214239	0.0374596
CBL	0.355037	2.1038e-10	1.97465e-09
CBLB	0.161338	0.0025621	0.00551902
CBR1	-0.265044	0.0105177	0.0197606
CBS	-0.723163	1.18202e-06	5.17498e-06
CBSL	-1.07193	0.013456	0.0247292
CBWD1	-0.196245	0.0202485	0.0356031
CBWD2	-0.234899	3.63323e-07	1.76926e-06
CBWD3	-0.292597	3.33456e-06	1.32502e-05
CBWD5	-0.360127	3.09058e-06	1.23813e-05
CBWD6	-0.449445	3.92034e-10	3.4462e-09
CBX1	-0.290145	5.33842e-08	3.0671e-07
CBX3	-0.437312	2.5704e-20	2.71665e-18
CBX8	-0.458526	7.99642e-11	8.16115e-10
CBY1	-0.426882	2.40582e-10	2.21301e-09
CC2D1B	0.156556	1.21497e-05	4.3084e-05
CCAR2	-0.22957	0.00022752	0.000614996
CCDC102A	-0.278385	0.000287592	0.000760308
CCDC106	-0.638161	1.47561e-08	9.41022e-08
CCDC107	-0.48254	9.11867e-05	0.000268804
CCDC114	-0.193548	0.000382696	0.000985445
CCDC12	-0.514652	2.20757e-08	1.35963e-07
CCDC120	0.592409	5.24654e-16	1.71841e-14
CCDC122	-0.221272	0.0244664	0.0421207
CCDC124	-0.417133	8.03571e-07	3.63394e-06
CCDC126	0.0743702	0.0296594	0.0499943
CCDC127	-0.260573	4.33579e-05	0.000136747
CCDC130	-0.329635	5.64684e-08	3.23598e-07
CCDC137	-0.329274	1.33586e-06	5.78219e-06
CCDC138	-0.411902	2.65166e-10	2.41504e-09
CCDC14	-0.204673	0.00225271	0.00492027
CCDC141	0.473218	1.20949e-05	4.29189e-05
CCDC146	-0.350944	0.010651	0.0199918
CCDC148	-0.529382	1.85535e-05	6.32427e-05
CCDC150	-0.696113	1.10481e-13	2.13279e-12
CCDC151	0.185696	4.94622e-06	1.89892e-05
CCDC154	-1.16765	3.89074e-06	1.52438e-05
CCDC157	-0.459284	7.95875e-07	3.60226e-06
CCDC163	-0.270003	0.0131814	0.0242701
CCDC167	-0.612043	9.85346e-09	6.53668e-08
CCDC169	-1.224	7.41869e-06	2.73996e-05
CCDC17	-0.0227514	0.000229768	0.000620857
CCDC170	0.555151	0.000150508	0.000423042
CCDC173	-0.220782	0.00423077	0.00867544
CCDC174	-0.129821	0.0121331	0.0224959
CCDC18	-0.22419	0.00153151	0.00348965
CCDC183	-0.554312	6.75422e-07	3.09646e-06
CCDC186	0.474713	1.00064e-17	5.05354e-16
CCDC187	-0.8199	0.000253909	0.000678714
CCDC189	-0.549646	2.05542e-05	6.94127e-05
CCDC190	-0.673474	0.02702	0.0460009
CCDC192	-0.239262	0.022677	0.0393691
CCDC24	-0.465691	1.62796e-07	8.45632e-07
CCDC25	-0.147915	0.0152822	0.0276918
CCDC28A	-0.322879	6.14762e-11	6.44224e-10
CCDC28B	-0.956258	4.96345e-11	5.28624e-10
CCDC3	0.0455684	0.0276546	0.0469588
CCDC33	-0.0937507	0.025438	0.0435779
CCDC34	-0.610011	1.58899e-16	5.92316e-15
CCDC40	-0.259064	0.000528303	0.00131916
CCDC43	-0.181683	1.96648e-08	1.22317e-07
CCDC51	-0.275145	1.57953e-05	5.45055e-05
CCDC57	-0.55912	5.97108e-15	1.53503e-13
CCDC58	-0.56864	2.85123e-18	1.73692e-16
CCDC59	-0.421162	4.84969e-19	3.59842e-17
CCDC6	0.18827	6.75068e-05	0.000204823
CCDC61	-0.363646	0.00124338	0.00288304
CCDC66	-0.211442	0.000668626	0.0016387
CCDC68	0.258616	0.0196492	0.0346897
CCDC69	0.669062	5.44739e-13	8.9773e-12
CCDC71L	0.11624	0.0283245	0.0479715
CCDC74A	-0.68198	4.0952e-06	1.59767e-05
CCDC74B	-0.629164	1.64109e-05	5.64928e-05
CCDC77	-0.511117	2.36226e-18	1.49127e-16
CCDC78	-0.76437	7.44092e-13	1.1851e-11
CCDC80	0.415658	0.00122984	0.00285377
CCDC85B	-0.607909	2.34697e-05	7.82125e-05
CCDC85C	0.398192	3.22391e-09	2.363e-08
CCDC86	-0.223064	0.00388984	0.00803527
CCDC92	0.344912	5.16287e-05	0.000160504
CCDC97	0.0597257	0.0213179	0.0372991
CCDC9B	0.210571	0.00433725	0.00887169
CCHCR1	-0.466836	6.73996e-11	6.98813e-10
CCL11	0.565078	0.000944117	0.00224364
CCL13	0.178392	0.0269551	0.0459005
CCL2	0.00618441	0.0265257	0.0452333
CCL21	-0.06444	0.0182492	0.0324634
CCL22	0.710277	5.79751e-11	6.09985e-10
CCL24	0.423461	0.00205002	0.0045281
CCL26	-1.13109	0.000591882	0.00146367
CCL8	0.136995	0.0166795	0.0299157
CCN4	0.16852	0.00033397	0.000871148
CCNA2	-0.267719	0.00266441	0.00571426
CCNB1	-0.466742	2.32069e-09	1.74929e-08
CCNB1IP1	-0.684557	3.3123e-23	8.10271e-21
CCNB2	-0.50093	2.46709e-13	4.36438e-12
CCNC	-0.128693	0.0239152	0.0412671
CCND3	-0.221942	0.00460049	0.00935515
CCNF	-0.177828	0.0106893	0.0200566
CCNG2	0.23234	9.52914e-05	0.000279903
CCNH	-0.283652	2.25031e-07	1.13319e-06
CCNI2	-0.898804	0.000388192	0.000997963
CCNK	0.271133	7.93609e-06	2.91182e-05
CCNL1	-0.128846	0.00735362	0.0143034
CCNL2	-0.277306	0.000210787	0.000574127
CCNO	-0.685512	2.94569e-10	2.65502e-09
CCNQ	-0.462299	1.64179e-11	1.94431e-10
CCNYL1	0.318114	3.78146e-09	2.72823e-08
CCR1	0.478674	8.43476e-05	0.000250673
CCR2	0.906528	1.15024e-08	7.51907e-08
CCR3	0.193453	0.00116391	0.00271527
CCR4	0.984061	3.2955e-12	4.50606e-11
CCR5	0.471328	5.3596e-05	0.00016606
CCR7	0.285757	2.97057e-06	1.19525e-05
CCR8	0.805244	2.93254e-12	4.05614e-11
CCS	-0.601314	7.89639e-10	6.51005e-09
CCSER2	0.344262	8.01654e-17	3.19356e-15
CCT2	-0.304639	7.1894e-09	4.88954e-08
CCT3	-0.328209	1.16707e-11	1.42191e-10
CCT4	-0.475597	1.33679e-23	3.87571e-21
CCT5	-0.230139	0.00050188	0.001259
CCT6A	-0.196664	4.51468e-05	0.000142017
CCT6B	-0.301072	0.00901369	0.0171802
CCT7	-0.440883	1.41285e-20	1.62644e-18
CCT8	-0.247882	5.17218e-08	2.97595e-07
CCZ1	-0.268419	7.96435e-05	0.000238094
CCZ1B	-0.106498	0.0177022	0.0315763
CD101	0.243267	9.77867e-05	0.000286534
CD109	0.188135	0.000478934	0.00120822
CD160	0.345976	0.000492538	0.00123865
CD163L1	0.419234	9.65315e-05	0.00028328
CD164	0.111837	0.00437154	0.0089325
CD177	0.317023	5.43157e-05	0.00016809
CD180	0.339169	0.000152032	0.000427174
CD1A	0.21148	3.72558e-05	0.000119255
CD1B	0.397543	3.69457e-06	1.45588e-05
CD1C	0.258819	2.4496e-06	1.00212e-05
CD1E	0.364076	4.71523e-06	1.81692e-05
CD2	0.212755	0.00102182	0.00241218
CD200R1	0.0917149	0.000936761	0.00222785
CD207	0.379038	8.24998e-05	0.000245788
CD209	0.270985	0.000271978	0.000722076
CD22	-0.519118	0.000252186	0.00067468
CD226	0.474046	4.54894e-06	1.75891e-05
CD24	0.319813	4.64835e-07	2.20931e-06
CD244	0.497778	9.23502e-06	3.35149e-05
CD247	0.144505	0.00978415	0.0184867
CD27	0.512887	2.02323e-06	8.41097e-06
CD274	0.289997	0.0127035	0.0234757
CD28	0.518069	7.90785e-07	3.5844e-06
CD2AP	0.194595	7.93609e-06	2.91182e-05
CD2BP2	-0.265076	2.08037e-06	8.63017e-06
CD302	0.383858	3.27727e-05	0.000105923
CD320	-0.800522	1.97126e-13	3.57613e-12
CD33	0.08987	0.0140378	0.0256927
CD34	0.28408	3.6553e-05	0.000117269
CD36	0.510194	3.01722e-08	1.81126e-07
CD37	-0.0216803	0.0163689	0.029416
CD3E	0.277787	8.81612e-05	0.000260769
CD3G	0.461237	6.23587e-06	2.33785e-05
CD4	0.34842	0.000137073	0.00038877
CD40LG	0.376053	8.51145e-07	3.83138e-06
CD44	0.26771	0.000351204	0.000912454
CD47	0.172485	0.00176026	0.00394935
CD48	0.0870007	0.00738117	0.0143517
CD5	0.574006	2.80559e-07	1.38913e-06
CD53	0.232914	0.00163696	0.00370082
CD6	0.242667	0.00450233	0.009177
CD63	-0.366697	5.01096e-08	2.88637e-07
CD69	0.0501904	0.00122984	0.00285377
CD72	-0.725441	0.00338455	0.00710588
CD74	0.122134	0.00638475	0.01261
CD79A	0.462128	4.95969e-05	0.000154802
CD82	0.258378	0.000403222	0.00103252
CD84	0.596646	2.02415e-05	6.84748e-05
CD8A	0.327817	0.000553444	0.00137579
CD93	0.470403	1.11859e-07	6.03675e-07
CD96	0.392467	0.000209748	0.000571695
CDA	0.763011	1.39159e-06	5.99523e-06
CDADC1	-0.310134	1.34123e-10	1.30668e-09
CDC123	-0.306265	2.73624e-09	2.03123e-08
CDC14B	0.182159	0.000818623	0.00196812
CDC16	-0.0824003	0.00432871	0.00885539
CDC20	-0.521872	1.1374e-10	1.12561e-09
CDC25A	-0.482904	3.37448e-09	2.45954e-08
CDC25C	-0.54011	5.02645e-11	5.34607e-10
CDC26	-0.438692	5.43613e-14	1.12428e-12
CDC34	-0.425816	4.96223e-07	2.34355e-06
CDC37	-0.302412	2.19255e-06	9.06193e-06
CDC40	0.132571	0.000992703	0.00234983
CDC42	0.0708211	0.00308693	0.00652477
CDC42BPB	0.472939	6.09079e-15	1.56068e-13
CDC42BPG	0.252679	1.887e-05	6.42095e-05
CDC42EP5	-0.551257	0.0129291	0.023842
CDC42SE1	0.228956	1.48287e-09	1.15906e-08
CDC42SE2	0.107848	0.0113402	0.0211587
CDC45	-0.673494	8.30892e-20	7.65203e-18
CDC6	-0.449286	1.17558e-10	1.15608e-09
CDC7	-0.317886	4.04619e-06	1.58012e-05
CDCA2	-0.246646	0.00275911	0.00588751
CDCA3	-0.630739	4.17107e-18	2.37463e-16
CDCA4	-0.171171	0.0109613	0.0205202
CDCA5	-0.526605	6.39586e-14	1.30044e-12
CDCA7	-0.548288	1.28909e-09	1.02239e-08
CDCA8	-0.280489	7.69815e-05	0.000230709
CDCP1	0.256347	0.000139525	0.000395223
CDH1	0.423673	3.93628e-11	4.27665e-10
CDH13	0.336259	4.82945e-06	1.85682e-05
CDH17	0.190561	0.00268083	0.0057449
CDH19	0.446202	0.00013625	0.000386647
CDH20	0.248153	0.00536263	0.0107459
CDH24	-0.230834	0.000174959	0.00048455
CDH3	0.404997	2.62872e-06	1.06814e-05
CDH5	0.483345	7.04166e-10	5.8703e-09
CDH6	0.153022	1.33509e-09	1.05513e-08
CDHR1	0.365508	0.000149751	0.000421293
CDHR2	0.0574742	0.0188744	0.0334728
CDHR3	-0.211702	6.31631e-08	3.57901e-07
CDIN1	0.13392	0.00328035	0.00690099
CDK1	-0.489417	7.71809e-13	1.21932e-11
CDK10	-0.450613	1.45435e-09	1.14018e-08
CDK11A	-0.469857	7.05775e-06	2.61591e-05
CDK12	0.231115	1.3923e-07	7.33937e-07
CDK13	0.237808	4.05444e-11	4.38978e-10
CDK15	0.305035	3.73566e-05	0.000119482
CDK17	0.203324	3.09058e-06	1.23813e-05
CDK19	0.287717	3.26379e-08	1.94362e-07
CDK2	-0.254073	4.72498e-07	2.24029e-06
CDK20	-0.399952	0.00477461	0.00968532
CDK2AP2	-0.209149	0.00515083	0.0103759
CDK4	-0.433201	1.76739e-17	8.3094e-16
CDK5	-0.289817	6.17062e-05	0.000188576
CDK5R1	0.368496	7.88251e-07	3.57395e-06
CDK5RAP1	-0.306801	7.77274e-10	6.41825e-09
CDK5RAP2	-0.138047	0.0247461	0.0425461
CDK5RAP3	-0.595097	2.58082e-06	1.05085e-05
CDK7	-0.112891	0.0231465	0.0400916
CDKL2	-0.491973	0.0239523	0.0413207
CDKL3	-0.351637	0.000142738	0.000403594
CDKL5	0.387184	1.03573e-09	8.38436e-09
CDKN1A	0.334743	2.21555e-08	1.36401e-07
CDKN2AIP	0.0840312	0.022289	0.0387903
CDKN2AIPNL	-0.516172	3.61207e-13	6.18715e-12
CDKN2B	0.681574	2.29529e-05	7.66369e-05
CDKN2D	-0.270589	0.00166523	0.00375552
CDKN3	-0.529722	1.05209e-09	8.49483e-09
CDON	0.0356635	0.00138353	0.00317929
CDPF1	-0.453459	4.49444e-12	5.9936e-11
CDR2L	-0.294901	0.0129064	0.0238085
CDRT1	0.282605	0.00509126	0.0102664
CDS1	0.416347	2.22712e-10	2.06562e-09
CDT1	-0.581192	4.34625e-13	7.34033e-12
CDV3	0.106582	0.0011693	0.00272662
CDYL	0.128017	0.000154346	0.000432976
CDYL2	0.431539	9.31617e-10	7.57683e-09
CEACAM1	0.447979	0.00418593	0.00858912
CEACAM19	0.734151	1.30051e-11	1.56742e-10
CEACAM21	0.407031	0.000148248	0.000417741
CEACAM5	0.38237	0.000139172	0.000394509
CEACAM6	0.638897	2.02845e-09	1.54537e-08
CEACAM7	0.813302	0.00273464	0.00584725
CEBPA	0.355071	3.04871e-07	1.50191e-06
CEBPD	-0.456823	3.06019e-05	9.94815e-05
CEBPZOS	-0.37595	6.38352e-11	6.66269e-10
CECR2	-0.103101	0.0276988	0.0470237
CEL	-0.943434	5.27443e-05	0.000163583
CELF2	0.379636	4.36796e-07	2.09192e-06
CELSR1	0.327001	1.52885e-06	6.52022e-06
CELSR2	0.674672	4.53016e-21	5.91035e-19
CEMIP	0.574201	2.24775e-08	1.38274e-07
CEMIP2	0.251219	5.11122e-06	1.95317e-05
CENATAC	-0.321194	1.71079e-06	7.22724e-06
CENPA	-0.56893	1.04512e-17	5.26121e-16
CENPH	-0.651107	8.31876e-17	3.28885e-15
CENPJ	-0.313356	6.05414e-06	2.27845e-05
CENPK	-0.503877	4.83389e-09	3.42906e-08
CENPL	-0.214639	0.000275303	0.000729914
CENPM	-0.721953	2.87956e-14	6.46806e-13
CENPN	-0.262712	0.00049143	0.00123715
CENPO	-0.355327	1.25083e-11	1.51454e-10
CENPQ	-0.273669	0.000290392	0.000767192
CENPS	-0.823409	3.6365e-16	1.22966e-14
CENPT	-0.125402	0.00969573	0.0183351
CENPU	-0.317709	6.60973e-05	0.000200819
CENPV	-1.07246	1.16202e-11	1.41686e-10
CENPW	-0.656339	5.20243e-13	8.61897e-12
CENPX	-0.665019	2.52877e-16	8.91676e-15
CEP104	0.238104	6.7965e-11	7.03278e-10
CEP112	0.0550567	0.0239152	0.0412671
CEP131	-0.528945	4.61835e-14	9.7446e-13
CEP152	-0.206708	0.00409584	0.00842301
CEP170B	0.248675	1.28228e-06	5.56566e-06
CEP20	-0.165328	0.0166226	0.0298342
CEP295	0.216582	2.25095e-05	7.53817e-05
CEP350	0.289347	4.17606e-11	4.5121e-10
CEP43	-0.209055	0.00080943	0.00194811
CEP55	-0.337436	8.6797e-05	0.000257269
CEP57	-0.211981	1.38982e-05	4.84719e-05
CEP57L1	-0.19655	0.000173219	0.000480327
CEP70	-0.308039	9.80396e-05	0.00028706
CEP72	-0.342795	6.45012e-08	3.65087e-07
CEP78	-0.13056	0.000975169	0.00231252
CEP83	-0.270991	3.85531e-07	1.86465e-06
CEP85L	0.095831	0.00499335	0.0100846
CEP89	-0.257536	2.54952e-08	1.55252e-07
CEP95	-0.401314	1.04234e-15	3.16872e-14
CEP97	0.195863	0.00288033	0.00611782
CEPT1	0.1036	0.0118987	0.0221005
CERS1	-0.952369	0.00051445	0.00128765
CERS3	0.625791	5.84444e-10	4.94865e-09
CERS4	0.0526043	0.0229953	0.0398643
CERS5	-0.342112	2.47862e-13	4.36997e-12
CERT1	0.25459	6.23885e-09	4.31048e-08
CES2	0.58797	1.98717e-10	1.87304e-09
CES4A	0.405352	0.000160277	0.000447768
CETN2	-0.279041	5.12648e-06	1.95804e-05
CETN3	-0.375805	6.25139e-11	6.53786e-10
CFAP126	0.26935	1.47707e-06	6.32697e-06
CFAP157	0.117954	0.0130433	0.0240327
CFAP161	0.21271	0.00719659	0.0140294
CFAP20	-0.225597	3.20609e-08	1.91363e-07
CFAP251	-0.311685	0.0084836	0.0162629
CFAP298	-0.562219	3.2955e-12	4.50606e-11
CFAP36	-0.572356	1.54143e-22	2.77386e-20
CFAP410	-0.414239	4.0525e-05	0.000128563
CFAP43	-0.0178575	6.47993e-06	2.42124e-05
CFAP45	-0.248404	0.00364924	0.00759538
CFAP52	0.0501719	0.0231465	0.0400916
CFAP94	-0.157547	0.00294785	0.0062536
CFB	0.136875	0.00249418	0.00538828
CFDP1	-0.570662	2.89566e-15	7.92559e-14
CFH	0.250723	3.99799e-05	0.000126963
CFLAR	0.243162	8.57828e-08	4.73393e-07
CGB7	-0.482549	0.000322147	0.000843964
CGNL1	0.210512	1.32397e-05	4.64132e-05
CGREF1	-0.927637	0.00026544	0.000706275
CGRRF1	-0.328151	4.19754e-05	0.000132761
CH25H	0.25385	0.014459	0.0263619
CHAC2	-0.436172	1.17764e-07	6.31624e-07
CHADL	-0.492356	0.0172867	0.0309127
CHAF1A	-0.391962	1.77904e-09	1.37205e-08
CHAF1B	-0.43851	4.41567e-12	5.90365e-11
CHAMP1	0.157529	0.00036751	0.000950246
CHCHD1	-0.520609	6.65003e-12	8.51987e-11
CHCHD10	-0.785143	9.17089e-10	7.4742e-09
CHCHD2	-0.523064	1.61005e-12	2.35579e-11
CHCHD3	-0.240984	2.39823e-07	1.20188e-06
CHCHD4	-0.342288	1.08982e-09	8.75884e-09
CHCHD5	-0.611295	1.50036e-14	3.52698e-13
CHCHD6	-0.694918	2.95851e-13	5.15221e-12
CHCHD7	-0.588734	8.81653e-17	3.45944e-15
CHD1	0.171248	4.6378e-05	0.000145481
CHD2	0.175324	1.37405e-05	4.80075e-05
CHD4	-0.659732	1.00335e-14	2.46601e-13
CHD5	-0.385068	0.0151472	0.0274727
CHD6	0.145067	0.000629891	0.00155007
CHD7	0.177946	0.00165812	0.00374111
CHD8	0.19374	3.40096e-07	1.66236e-06
CHD9	0.365813	1.19727e-13	2.29151e-12
CHEK1	-0.297612	5.61584e-07	2.62296e-06
CHEK2	-0.643336	4.0698e-19	3.07811e-17
CHFR	0.144936	0.0172867	0.0309127
CHGA	-1.31614	0.000722878	0.00175763
CHI3L1	0.522673	0.00190007	0.00422911
CHI3L2	0.468933	1.98077e-08	1.23059e-07
CHID1	-0.204495	0.000467831	0.00118287
CHKA	-0.473717	2.26363e-10	2.097e-09
CHKB	-0.356795	0.00283024	0.00601797
CHM	0.288241	5.8106e-09	4.04674e-08
CHMP1B	0.118198	0.00562887	0.011229
CHMP2A	-0.307993	0.00193659	0.00430304
CHMP2B	0.18536	5.82079e-05	0.000178757
CHMP3	0.0656457	0.0258093	0.0441608
CHMP4A	-0.356368	7.48461e-06	2.76105e-05
CHP1	0.308212	5.2202e-11	5.53709e-10
CHP2	-0.00356001	0.0152997	0.0277204
CHPF2	0.220574	1.40176e-05	4.88122e-05
CHRAC1	-0.210969	3.59744e-07	1.75238e-06
CHRDL1	0.585477	0.006062	0.0120287
CHRDL2	0.990302	0.0160085	0.0288478
CHRNA5	-0.916532	4.76695e-20	4.66446e-18
CHRNA6	-0.556031	7.32507e-06	2.7073e-05
CHRNA9	-0.213641	0.000121744	0.000348834
CHST10	-0.674025	0.000146389	0.000412652
CHST11	0.224829	0.00382075	0.00790194
CHST15	0.201474	0.000932581	0.00221892
CHST2	0.577215	1.21917e-06	5.31532e-06
CHST3	0.159374	0.00106109	0.0024966
CHST7	-0.385706	0.00165458	0.00373365
CHSY1	0.147839	0.00135674	0.00312324
CHTF18	-0.596573	7.28011e-15	1.84429e-13
CHTF8	0.230829	0.0046639	0.00947548
CHTOP	-0.355469	4.03564e-18	2.32287e-16
CIAO1	-0.230296	1.07348e-10	1.06775e-09
CIAO2A	-0.298942	1.10713e-07	5.98522e-07
CIAO2B	-0.3817	1.57572e-08	9.98763e-08
CIAO3	-0.408777	4.81504e-06	1.85219e-05
CIB1	-0.48824	2.11932e-06	8.78011e-06
CIBAR1	-0.586903	5.38334e-16	1.75221e-14
CIBAR2	0.575761	0.0234164	0.0405092
CIC	0.230467	1.69469e-08	1.06683e-07
CIDEA	-0.630711	0.00377622	0.00781811
CIITA	0.339837	0.000490282	0.00123466
CILP	0.915636	0.0154676	0.0279761
CILP2	-0.18135	0.0286875	0.0485127
CINP	-0.266714	0.000670159	0.00164169
CIPC	0.205279	6.77291e-06	2.51868e-05
CIR1	-0.122859	0.000581038	0.00143913
CIRBP	-0.409107	3.75503e-07	1.82178e-06
CISD1	-0.440814	1.79284e-09	1.37998e-08
CISD2	-0.305971	1.80806e-07	9.2962e-07
CISD3	-0.636735	7.45212e-12	9.45465e-11
CISH	0.120855	0.00559651	0.0111702
CITED2	0.125413	0.00192028	0.00426983
CKAP4	0.113008	0.00488763	0.00989151
CKS1B	-0.777628	7.46701e-26	4.32976e-23
CKS2	-0.785871	1.39629e-22	2.5718e-20
CLASP1	0.127438	3.97638e-05	0.000126379
CLASP2	0.23821	7.74482e-09	5.22416e-08
CLASRP	-0.366243	1.0888e-11	1.33592e-10
CLBA1	-0.47156	1.4175e-08	9.07663e-08
CLCA2	0.702459	1.62241e-14	3.79678e-13
CLCA4	1.0087	5.28147e-06	2.01087e-05
CLCN1	0.41518	2.82549e-05	9.25244e-05
CLCN2	-0.299038	0.000816777	0.00196458
CLCN3	0.560814	1.82057e-16	6.5979e-15
CLCN4	0.329443	8.21777e-05	0.000244875
CLCN5	0.126676	0.00277614	0.00591819
CLCN7	0.191417	9.33903e-07	4.17271e-06
CLDN11	-0.0930034	0.0123279	0.0228301
CLDN15	-0.335908	9.18151e-06	3.33362e-05
CLDN17	1.60246	4.95283e-08	2.85709e-07
CLDN23	0.229919	0.00121111	0.00281365
CLDN24	0.467359	0.00113498	0.0026553
CLDN3	-1.33128	1.97881e-06	8.23942e-06
CLDN7	-0.502176	0.000875847	0.0020922
CLDND2	-0.897784	1.1755e-05	4.18551e-05
CLEC10A	0.585511	9.44996e-08	5.17122e-07
CLEC14A	0.304737	9.02455e-05	0.000266481
CLEC16A	0.318602	2.43033e-14	5.56275e-13
CLEC1A	-0.66994	0.00028969	0.000765595
CLEC4D	0.362031	0.00241697	0.00524101
CLEC5A	0.267059	0.000114983	0.000331219
CLEC7A	0.310251	2.00965e-08	1.24655e-07
CLEC9A	0.109287	0.0158667	0.028631
CLGN	-0.611598	0.0259274	0.044324
CLHC1	-0.348707	1.71613e-06	7.24784e-06
CLIC1	-0.263962	9.52914e-05	0.000279903
CLIC2	0.163315	0.00281048	0.00598081
CLIC3	0.493139	0.000101908	0.000297219
CLIC4	0.185623	0.000115278	0.000331824
CLIC5	0.603751	0.000344543	0.000896338
CLINT1	0.179091	4.62535e-05	0.000145119
CLIP1	0.639242	7.74628e-23	1.55482e-20
CLIP4	0.213567	0.000116464	0.000334683
CLK1	-0.20523	0.000503054	0.00126154
CLK2	-0.253087	1.67838e-07	8.698e-07
CLK3	-0.126442	0.00170121	0.00383004
CLMP	0.263255	0.00224802	0.00491069
CLN5	-0.203747	9.90574e-05	0.000289715
CLN6	-0.14049	0.00695127	0.013607
CLNK	0.414236	4.34325e-08	2.52781e-07
CLNS1A	-0.30501	2.84895e-05	9.32147e-05
CLOCK	0.427534	8.10176e-17	3.21117e-15
CLPP	-0.462213	7.68289e-13	1.21498e-11
CLPTM1	0.114973	0.0003597	0.00093267
CLPTM1L	-0.257084	1.06124e-05	3.81423e-05
CLPX	0.305408	1.90197e-07	9.73431e-07
CLSTN1	0.31204	2.14474e-08	1.32406e-07
CLTA	-0.555619	4.1467e-10	3.62889e-09
CLTC	0.211105	5.33842e-08	3.0671e-07
CLTRN	-0.62179	0.000178489	0.000493278
CLUAP1	-0.446727	2.48519e-10	2.27932e-09
CLVS1	0.385357	0.00227062	0.00495592
CLYBL	-0.37264	0.000739262	0.00179412
CMA1	0.997872	7.97153e-05	0.000238263
CMBL	-0.583613	1.00488e-06	4.45803e-06
CMC1	-0.382008	1.73153e-09	1.34003e-08
CMC2	-0.636904	1.53417e-20	1.72798e-18
CMIP	0.406182	2.47862e-13	4.36997e-12
CMKLR1	0.214436	0.0123716	0.0229002
CMPK1	0.151734	9.30971e-05	0.000273971
CMPK2	0.297264	0.00070795	0.00172535
CMSS1	-0.459785	9.47659e-13	1.46606e-11
CMTM1	0.411613	1.21981e-08	7.93411e-08
CMTM8	-0.242108	0.0168798	0.0302437
CMTR2	0.300513	4.88064e-11	5.20513e-10
CMYA5	1.30999	0.00301865	0.00639341
CNDP2	0.199902	0.00170484	0.00383602
CNEP1R1	0.218686	1.37814e-07	7.2794e-07
CNFN	0.991794	4.38234e-08	2.54866e-07
CNGA1	0.48934	1.78369e-05	6.09726e-05
CNGB1	0.838482	6.07794e-08	3.46274e-07
CNIH2	-0.464025	0.0256432	0.0439005
CNIH3	-0.606897	2.81177e-06	1.13632e-05
CNIH4	-0.310451	1.88102e-13	3.43232e-12
CNNM4	0.0805607	0.0118144	0.0219545
CNOT1	0.455818	3.6457e-13	6.22432e-12
CNOT10	-0.171801	5.21837e-05	0.000162069
CNOT4	0.240379	7.92253e-12	1.00028e-10
CNOT6	0.236786	1.29038e-06	5.59774e-06
CNOT6L	0.209277	1.2464e-06	5.4265e-06
CNOT8	-0.136911	0.00236817	0.0051466
CNP	0.0897422	0.021709	0.0378861
CNPY2	-0.664948	1.05874e-13	2.05653e-12
CNPY3	-0.492395	4.86872e-14	1.02315e-12
CNPY4	-0.229334	0.00682161	0.0133834
CNR1	0.158568	1.76465e-05	6.03876e-05
CNR2	-0.147006	1.15877e-05	4.13346e-05
CNTD1	0.0265463	0.00278183	0.00592711
CNTF	0.38251	2.68568e-06	1.08902e-05
CNTN1	0.326332	0.000252186	0.00067468
CNTN3	0.722376	7.1918e-05	0.000217029
CNTN4	0.428385	0.00200512	0.00443894
CNTNAP1	0.190673	0.00318875	0.00671822
CNTROB	-0.245998	6.833e-06	2.54043e-05
COA1	-0.378355	1.1277e-17	5.64067e-16
COA3	-0.44615	6.21556e-09	4.29818e-08
COA4	-0.390739	4.48397e-07	2.13897e-06
COA5	-0.46389	3.73829e-19	2.85496e-17
COA6	-0.665399	3.34729e-16	1.14672e-14
COA8	-0.603874	1.93565e-15	5.47015e-14
COASY	-0.208221	4.06349e-05	0.000128886
COBL	0.776779	1.11232e-06	4.89308e-06
COBLL1	0.404668	1.2978e-10	1.26831e-09
COCH	-0.991374	0.0243469	0.0419197
COG5	0.0611055	0.00312476	0.00659761
COG6	0.142906	0.000466734	0.00118048
COIL	-0.150667	0.0017158	0.00385789
COL12A1	0.44706	5.17252e-06	1.97418e-05
COL14A1	0.673231	5.08435e-10	4.37126e-09
COL15A1	0.425827	6.20979e-07	2.8755e-06
COL17A1	0.394023	0.000650481	0.00159773
COL18A1	0.246797	0.000473352	0.00119606
COL19A1	-0.138407	0.0278681	0.0472803
COL1A1	0.308307	0.014763	0.026863
COL1A2	0.324874	0.00854634	0.0163792
COL24A1	0.441356	0.000455895	0.00115493
COL3A1	0.412811	0.00535397	0.0107299
COL4A1	0.33486	1.47548e-05	5.11743e-05
COL4A2	0.222641	0.000460202	0.00116509
COL4A4	0.286927	0.000893724	0.00213132
COL5A1	0.364236	0.000711187	0.00173216
COL5A2	0.334253	0.000803961	0.00193554
COL5A3	0.277888	0.00918006	0.0174718
COL6A3	0.386881	9.50452e-05	0.000279337
COL6A5	1.60085	3.10672e-12	4.26656e-11
COL6A6	1.26457	2.37669e-10	2.19008e-09
COL8A1	0.367554	0.00671945	0.0132061
COL8A2	0.171582	0.00689914	0.0135151
COL9A2	-1.03748	0.000514934	0.00128845
COL9A3	-1.191	0.00777675	0.0150479
COLEC11	-0.960205	0.000567738	0.00140819
COLEC12	0.422749	0.00859366	0.0164618
COLGALT1	-0.143301	0.00101053	0.00238805
COMMD1	-0.399858	2.71877e-06	1.10186e-05
COMMD3	-0.746218	6.14762e-11	6.44224e-10
COMMD4	-0.584777	7.04339e-13	1.12983e-11
COMMD5	-0.331552	4.75302e-08	2.75503e-07
COMMD6	-0.79393	3.58491e-20	3.62099e-18
COMMD7	-0.475728	3.20422e-07	1.57505e-06
COMMD9	-0.111171	0.0188427	0.0334279
COMP	0.569025	0.0204177	0.0358685
COMTD1	-0.598363	0.000527075	0.0013163
COP1	-0.222185	1.39706e-07	7.36194e-07
COPA	0.23658	8.13062e-11	8.2873e-10
COPB1	0.0567789	0.0267397	0.0455782
COPB2	0.177015	1.13008e-06	4.96143e-06
COPE	-0.468902	1.74379e-10	1.66978e-09
COPG1	0.168951	4.0525e-05	0.000128563
COPRS	-0.546829	3.71257e-16	1.2473e-14
COPS3	-0.330854	4.55106e-09	3.24312e-08
COPS4	-0.164661	0.00624087	0.0123445
COPS5	-0.232583	1.39183e-08	8.92685e-08
COPS6	-0.305289	1.95502e-10	1.84718e-09
COPS7A	-0.140413	0.00773348	0.014979
COPS7B	-0.332557	4.20795e-13	7.11444e-12
COPS8	-0.239385	1.46325e-06	6.2729e-06
COPS9	-0.811295	4.07399e-13	6.90285e-12
COPZ1	-0.226977	3.00646e-08	1.80549e-07
COQ10A	-0.380946	4.42104e-10	3.84746e-09
COQ2	-0.229947	0.000132291	0.000376297
COQ3	-0.444556	1.12239e-11	1.37282e-10
COQ4	-0.37742	5.87748e-06	2.21676e-05
COQ5	-0.33913	2.04386e-11	2.37379e-10
COQ6	-0.329556	1.66416e-08	1.04972e-07
COQ7	-0.168466	0.000877817	0.00209626
COQ8B	-0.130916	0.00998119	0.0188408
COQ9	-0.12257	0.0129064	0.0238085
CORO2B	0.17714	0.00176401	0.0039572
COX10	-0.124199	0.02251	0.0391227
COX11	-0.217044	4.64835e-07	2.20931e-06
COX14	-0.693882	2.16289e-14	4.98708e-13
COX15	-0.207191	4.85012e-07	2.29337e-06
COX16	-0.188918	0.00121111	0.00281365
COX17	-0.411129	5.37662e-06	2.04213e-05
COX19	-0.470456	2.96205e-17	1.28816e-15
COX4I1	-0.628316	7.64922e-15	1.9161e-13
COX5A	-0.445132	5.77516e-10	4.89794e-09
COX5B	-0.48432	1.74598e-16	6.38671e-15
COX6A1	-0.60185	5.3282e-16	1.73788e-14
COX6B1	-0.582167	5.79751e-11	6.09985e-10
COX6C	-0.863842	1.75323e-19	1.4837e-17
COX7A2	-0.518491	1.93914e-10	1.83328e-09
COX7A2L	-0.412098	7.09995e-23	1.46259e-20
COX7B	-0.56072	6.30487e-14	1.28527e-12
COX7C	-0.509676	6.33888e-13	1.02841e-11
COX8A	-0.44951	2.5057e-09	1.87879e-08
CPA3	0.95482	5.06329e-12	6.66702e-11
CPA4	0.47386	2.31766e-06	9.54373e-06
CPD	0.163314	0.000538229	0.0013418
CPE	-0.101339	0.0118144	0.0219545
CPEB2	0.87607	5.42885e-18	2.98225e-16
CPEB3	0.549928	5.82932e-12	7.58005e-11
CPEB4	0.931177	8.99435e-29	1.40816e-25
CPED1	0.120877	6.84021e-05	0.000207379
CPLANE2	0.191346	1.93532e-05	6.56541e-05
CPLX1	-0.432189	0.00624087	0.0123445
CPM	0.525567	8.99137e-12	1.12166e-10
CPNE1	-0.309416	3.68372e-08	2.17549e-07
CPNE2	-0.160255	0.0246659	0.0424268
CPNE3	0.169427	3.98717e-05	0.000126645
CPNE5	0.419617	3.17637e-06	1.26893e-05
CPNE7	-0.769912	0.000813096	0.00195633
CPOX	-0.154087	0.000674778	0.00165197
CPPED1	0.227594	3.64537e-05	0.000116998
CPSF1	-0.316753	9.58128e-08	5.23576e-07
CPSF2	0.097757	0.00252532	0.00544954
CPSF3	-0.254769	1.15157e-10	1.13604e-09
CPSF4	-0.491922	4.90735e-20	4.77202e-18
CPSF6	-0.11998	2.35351e-05	7.84137e-05
CPT2	0.0984892	0.0150726	0.0273501
CPTP	0.10695	0.0121546	0.0225305
CPVL	0.158874	0.000916033	0.00218154
CPXM2	0.245332	0.000214461	0.000583424
CR1	0.256174	0.00216046	0.00474061
CRABP1	-1.66374	0.000399291	0.00102363
CRABP2	0.648198	8.16556e-07	3.6884e-06
CRACD	0.505511	5.98729e-09	4.15133e-08
CRACDL	0.110345	0.00783478	0.015149
CRACR2B	-0.546265	2.40644e-05	8.0007e-05
CRAMP1	-0.100046	0.0241501	0.0416082
CRCP	-0.211083	8.24339e-06	3.01539e-05
CRCT1	0.611573	2.20541e-07	1.11488e-06
CREB1	0.158132	7.14121e-06	2.64372e-05
CREB3	-0.367073	0.000510151	0.0012777
CREB3L2	0.463366	2.31381e-17	1.02621e-15
CREB3L4	-0.533319	3.68243e-09	2.66291e-08
CREBBP	0.30359	5.04396e-10	4.33892e-09
CREBL2	0.0989584	0.00658124	0.0129605
CREBRF	0.203832	0.000139525	0.000395223
CREBZF	-0.140899	0.00867305	0.0166037
CRIM1	0.234405	7.51881e-05	0.000225853
CRIP1	-0.533708	0.00573794	0.0114277
CRIPT	-0.332912	5.35859e-14	1.10971e-12
CRISP3	0.0826531	0.0119245	0.022146
CRISPLD2	0.606322	4.66358e-07	2.21453e-06
CRK	0.0601291	0.0194856	0.0344357
CRKL	0.115971	0.00234856	0.00510752
CRLS1	-0.355465	5.09601e-06	1.94831e-05
CRNKL1	-0.163785	0.0112796	0.0210531
CRNN	1.4319	0.000361379	0.000936514
CROCC	-0.344146	0.00013398	0.000380619
CROT	0.265233	5.03558e-06	1.93039e-05
CRTAM	0.429673	3.34062e-05	0.000107814
CRTAP	-0.198201	0.000354579	0.00092046
CRTC1	-0.153991	0.0150466	0.0273124
CRTC2	-0.170717	3.12843e-06	1.25201e-05
CRTC3	0.0936197	0.00590513	0.0117368
CRY2	0.160772	0.000176716	0.000488896
CRYAB	0.546566	0.000401315	0.00102798
CRYBB2	-0.743092	0.0162459	0.0292184
CRYBB3	-0.784935	3.76372e-06	1.48017e-05
CRYBG1	0.635973	8.81653e-17	3.45944e-15
CRYBG2	0.69257	2.66378e-16	9.35071e-15
CRYBG3	0.786166	4.06897e-21	5.44477e-19
CRYGS	-0.274149	0.00170484	0.00383602
CRYZL1	-0.221269	2.10626e-06	8.73294e-06
CSAD	-0.399972	6.91265e-05	0.000209251
CSDE1	0.162269	7.49913e-05	0.000225348
CSE1L	-0.184765	0.000201609	0.000551045
CSF1	0.132254	0.00164047	0.00370661
CSF1R	0.32071	7.22867e-05	0.000218016
CSF2RA	0.16827	0.000211308	0.000575346
CSF2RB	0.48398	3.90301e-14	8.41675e-13
CSF3R	0.43767	0.000383608	0.000987305
CSGALNACT1	0.357349	1.37161e-08	8.80804e-08
CSGALNACT2	0.172473	0.00415296	0.00852929
CSKMT	-0.576766	4.69924e-11	5.03569e-10
CSMD2	0.631015	1.18875e-06	5.20151e-06
CSNK1A1	0.511391	2.19586e-15	6.17207e-14
CSNK1E	-0.162126	0.0034499	0.00722951
CSNK1G1	0.19446	3.76743e-07	1.82723e-06
CSNK1G2	-0.167185	0.00239787	0.00520175
CSNK2B	-0.706835	3.73743e-14	8.10432e-13
CSPG4	0.374421	0.000461285	0.00116764
CSPG5	-0.556655	0.00649461	0.0128028
CSPP1	-0.158073	0.000196673	0.000538872
CSRNP1	0.311412	2.31053e-06	9.51689e-06
CST3	0.00832016	0.00534364	0.0107119
CST6	0.379893	1.51371e-05	5.23842e-05
CST7	0.256551	0.000180728	0.000498675
CSTA	0.416205	0.00208917	0.00460547
CSTB	0.565163	0.000609908	0.00150563
CSTF1	-0.135729	0.000125731	0.000359664
CSTF3	-0.267433	2.64273e-08	1.60366e-07
CTBP1	-0.157182	0.00345685	0.00724309
CTBP2	-0.115751	0.0290544	0.049075
CTBS	0.235029	2.72944e-08	1.65308e-07
CTC1	0.119491	0.00100158	0.00236905
CTCF	0.123069	6.18699e-05	0.000189039
CTDNEP1	-0.332288	2.46758e-09	1.85377e-08
CTDSP2	0.218462	9.42616e-09	6.27716e-08
CTF1	-0.314957	0.0144339	0.0263224
CTIF	0.161684	0.000295354	0.000779773
CTNNA1	0.234556	2.20757e-08	1.35963e-07
CTNNA3	1.29325	0.0171858	0.0307533
CTNNAL1	-0.228721	0.014334	0.0261767
CTNNBIP1	0.331037	9.33385e-05	0.000274527
CTNNBL1	-0.225608	2.28928e-06	9.43431e-06
CTPS2	-0.292416	0.000123824	0.000354402
CTR9	0.212119	8.56734e-07	3.85211e-06
CTSA	0.178465	6.85825e-05	0.000207805
CTSC	0.0563714	0.0162295	0.0291922
CTSG	0.908082	2.40483e-06	9.85865e-06
CTSO	0.285842	6.95473e-06	2.57956e-05
CTSS	0.34702	0.00208041	0.0045881
CTSW	0.208391	0.014585	0.0265576
CTTNBP2	0.181946	0.00133331	0.00307342
CTTNBP2NL	0.396809	5.6537e-15	1.46547e-13
CTU1	-0.661278	5.08566e-12	6.69085e-11
CTU2	-0.349618	3.03861e-07	1.4974e-06
CTXN1	-1.12624	0.000425777	0.00108602
CUBN	0.148463	0.000262226	0.000698437
CUEDC1	-0.23276	0.0105367	0.0197915
CUEDC2	-0.555109	4.05624e-14	8.73515e-13
CUL3	0.319031	1.46212e-10	1.41389e-09
CUL4B	0.0977543	0.000964356	0.00228896
CUL5	0.195002	3.70537e-05	0.000118681
CUTA	-0.609194	5.4725e-13	9.0092e-12
CUTC	-0.227792	4.03975e-08	2.36967e-07
CUX1	0.244748	1.44363e-08	9.24018e-08
CWC15	-0.294311	1.30264e-06	5.64933e-06
CWC25	-0.121554	0.00301252	0.00638127
CWC27	-0.250701	1.00204e-07	5.44909e-07
CWF19L1	-0.289777	2.9007e-11	3.24381e-10
CWH43	1.2201	1.91695e-10	1.8178e-09
CX3CR1	0.608944	3.41315e-09	2.48427e-08
CXADR	0.119368	0.00349176	0.00730452
CXCL12	0.469732	0.000532005	0.00132755
CXCL14	0.292555	2.53673e-05	8.38225e-05
CXCL16	0.152755	0.000224187	0.00060714
CXCL9	0.566816	0.000218734	0.000593603
CXCR1	0.876883	5.42115e-09	3.80258e-08
CXCR2	1.29857	2.22932e-15	6.24368e-14
CXCR3	0.487433	1.76369e-05	6.03679e-05
CXCR6	0.405691	6.95473e-06	2.57956e-05
CXorf21	0.449271	2.37544e-06	9.76111e-06
CXorf56	-0.200024	6.32868e-06	2.37038e-05
CXXC5	0.298993	1.85021e-05	6.30811e-05
CYB561A3	0.118279	0.000691969	0.00169114
CYB561D1	0.254535	2.58082e-06	1.05085e-05
CYB561D2	-0.307638	0.024546	0.0422438
CYB5R1	0.293514	1.47548e-05	5.11743e-05
CYB5R3	0.119446	0.00107766	0.00253255
CYB5R4	0.0397087	0.0236051	0.0408039
CYBA	-0.359421	0.00814588	0.0156924
CYBB	0.482219	0.000238384	0.000642365
CYBC1	-0.190462	0.0089643	0.0170965
CYC1	-0.466955	1.37286e-13	2.58645e-12
CYCS	-0.324815	2.06212e-07	1.04922e-06
CYFIP1	0.248111	5.57588e-09	3.89888e-08
CYFIP2	0.258859	9.64597e-06	3.4885e-05
CYHR1	-0.402373	3.59744e-07	1.75238e-06
CYLD	0.410007	6.76723e-17	2.74476e-15
CYP19A1	0.36529	0.0192907	0.0341415
CYP24A1	-0.0775832	0.00696435	0.0136275
CYP26B1	0.478696	7.62084e-10	6.30612e-09
CYP27C1	0.262058	0.000351204	0.000912454
CYP2C18	0.713387	5.28828e-05	0.00016398
CYP2C19	0.30421	0.0208075	0.0364713
CYP2D6	-0.484632	0.00267265	0.00573034
CYP2R1	-0.288778	0.000543257	0.00135304
CYP2U1	0.148706	0.0268257	0.0456999
CYP2W1	-1.52285	0.011109	0.0207668
CYP39A1	0.510249	8.36458e-06	3.05259e-05
CYP4F22	1.09541	1.08448e-08	7.12194e-08
CYP51A1	0.308189	1.80391e-05	6.15831e-05
CYP7B1	0.705881	1.80329e-13	3.29817e-12
CYRIA	0.327742	0.00146368	0.00335019
CYRIB	-0.116764	0.0126811	0.0234371
CYSLTR1	0.467243	3.50482e-08	2.07925e-07
CYSLTR2	0.399343	3.74268e-07	1.81635e-06
CYSRT1	0.731511	7.80697e-07	3.54484e-06
CYSTM1	-0.341903	1.2575e-05	4.44112e-05
CYTH2	-0.182474	0.00038088	0.000981574
CYTH3	0.0957898	0.0183418	0.032617
CYTH4	0.209751	0.00699059	0.0136738
CYTIP	0.337659	0.000115278	0.000331824
CYYR1	0.450936	6.09924e-08	3.47236e-07
CZIB	-0.227143	1.51371e-05	5.23842e-05
D2HGDH	-0.499928	1.7638e-08	1.10589e-07
DAAM1	0.418324	9.02781e-10	7.37679e-09
DAAM2	0.526718	3.91289e-08	2.30042e-07
DAB2	0.306291	0.00162647	0.00368136
DAB2IP	0.284489	1.11939e-06	4.92141e-06
DAD1	-0.273033	7.63976e-06	2.81232e-05
DAG1	0.257152	1.76534e-09	1.36283e-08
DAGLA	0.217499	0.0159674	0.0287935
DAGLB	-0.196796	0.000696728	0.00169986
DALRD3	-0.182251	0.000498374	0.00125101
DAP3	-0.320941	1.61034e-18	1.05931e-16
DAPK1	0.294852	1.48389e-05	5.14547e-05
DAPP1	0.19765	0.000511343	0.00128028
DARS1	-0.132561	0.0175528	0.031342
DAXX	-0.157396	0.000164349	0.000457919
DAZAP1	-0.305417	1.00472e-10	1.0051e-09
DBF4	-0.300056	1.15706e-05	4.1283e-05
DBF4B	-0.419977	1.28374e-11	1.55199e-10
DBH	0.242318	9.41087e-05	0.000276688
DBI	-0.189926	0.0127484	0.023553
DBN1	-0.360688	7.3445e-07	3.34747e-06
DCAF1	0.112657	0.00179811	0.00402334
DCAF12	0.0169054	0.0288246	0.0487341
DCAF13	-0.358986	2.09708e-11	2.42839e-10
DCAF15	-0.116586	0.00403942	0.00831902
DCAF4	-0.314051	5.91241e-06	2.2294e-05
DCAF5	0.260184	4.24715e-11	4.58575e-10
DCAF8	-0.264334	3.66936e-07	1.78353e-06
DCAKD	-0.244275	0.000320601	0.000840478
DCBLD1	0.16993	0.00835937	0.0160621
DCC	1.08722	0.0002042	0.000557348
DCDC1	-0.249212	0.000708978	0.00172759
DCHS1	0.592228	8.97284e-08	4.94296e-07
DCLK2	0.118119	0.00242791	0.00525963
DCLK3	0.25206	0.00179811	0.00402334
DCN	0.26878	0.00347077	0.00726644
DCP1A	0.13618	0.000273968	0.000726868
DCPS	-0.106367	0.0103859	0.019527
DCST2	-0.531587	7.34343e-05	0.000221307
DCTN1	0.212472	6.81993e-07	3.12475e-06
DCTN3	-0.297438	0.0014924	0.00341096
DCTN4	0.263667	2.73924e-08	1.65837e-07
DCTN6	-0.175754	0.000398469	0.00102169
DCTPP1	-0.704031	2.53908e-22	4.36834e-20
DCUN1D2	-0.158056	1.65827e-06	7.0205e-06
DCUN1D3	0.405228	4.31685e-09	3.08746e-08
DCUN1D5	-0.7968	1.47245e-06	6.31062e-06
DCXR	-0.717699	3.88984e-13	6.59798e-12
DDA1	-0.163607	0.000168097	0.000467281
DDB2	-0.307788	3.97638e-05	0.000126379
DDHD1	0.171589	0.00181732	0.00406109
DDI2	0.335566	7.40697e-13	1.18089e-11
DDIAS	-0.146395	0.00938332	0.0178045
[truncated: 7,291 more rows]

## Sheet: cluster_B_diffSig
cluster_B_diffSig
	log2foldChange	pValues	FDR
A2M	-0.698047	8.06416e-10	6.01935e-09
A2ML1	-0.6307	0.000851057	0.00194708
A4GALT	0.424066	0.00241363	0.00499603
AAAS	0.27844	1.28003e-11	1.3416e-10
AADAT	0.452758	0.0243134	0.0400416
AAGAB	0.237428	0.000148365	0.000397922
AAK1	-0.216649	4.58776e-09	2.9671e-08
AAMDC	0.599188	2.31277e-11	2.31572e-10
AAMP	0.195202	5.85123e-07	2.52075e-06
AARSD1	0.501786	1.03564e-07	5.11302e-07
AASDHPPT	-0.229069	0.031134	0.0499532
AATF	0.259801	7.36842e-08	3.73902e-07
ABCA1	-0.562546	3.10692e-11	3.03157e-10
ABCA12	-0.914613	5.94728e-07	2.55511e-06
ABCA6	-0.673474	7.56446e-09	4.69487e-08
ABCA8	-1.22799	1.02699e-06	4.20388e-06
ABCA9	-0.815599	7.01954e-09	4.38267e-08
ABCB1	-0.788903	4.95507e-11	4.68062e-10
ABCB11	-0.848085	1.70811e-07	8.09187e-07
ABCB4	-0.546922	1.17571e-05	3.89505e-05
ABCB6	0.491308	3.34327e-06	1.24275e-05
ABCB7	0.155963	0.000188398	0.000494806
ABCB9	0.35255	1.21352e-07	5.91493e-07
ABCC1	-0.0127021	0.0235691	0.0389631
ABCC10	-0.137349	0.000154883	0.000414554
ABCC11	0.0109662	0.0191156	0.0323123
ABCC6	0.513769	0.00106021	0.00237944
ABCC9	-0.974065	1.06168e-10	9.40053e-10
ABCD1	-0.168774	0.0219936	0.0366288
ABCD2	-1.04968	1.01388e-10	8.99589e-10
ABCD3	-0.129445	0.000660689	0.00154881
ABCD4	0.205156	0.00161047	0.00347379
ABCF2	0.368876	1.3451e-07	6.50974e-07
ABCG1	-0.256349	0.00176613	0.00377374
ABCG2	-0.204358	4.34086e-05	0.000129042
ABCG4	-0.6513	0.0180477	0.0307057
ABHD1	0.825344	0.000813358	0.00186901
ABHD10	0.257485	3.02292e-06	1.13522e-05
ABHD11	0.505763	2.66406e-11	2.62722e-10
ABHD12	0.342174	6.28582e-05	0.000181095
ABHD14A	0.567015	6.01006e-10	4.61566e-09
ABHD14B	0.510035	3.38489e-10	2.73475e-09
ABHD17A	0.255628	0.000124468	0.000338223
ABHD17B	-0.199181	0.000538775	0.00128627
ABHD17C	0.196736	0.0194073	0.0327385
ABHD2	-0.456649	1.89768e-11	1.9309e-10
ABHD4	-0.181913	0.00715463	0.0133416
ABHD6	-0.169332	0.00241363	0.00499603
ABI1	-0.104734	0.00296719	0.0060048
ABI3	-0.244337	9.44585e-05	0.000263336
ABI3BP	-0.755672	2.60572e-05	8.07502e-05
ABL1	-0.31385	6.19438e-11	5.74068e-10
ABL2	-0.272682	1.02321e-05	3.43845e-05
ABLIM1	-0.369396	3.26846e-05	9.94997e-05
ABLIM3	-0.24289	0.00446159	0.00870352
ABR	-0.427448	7.27903e-18	2.81301e-16
ABRACL	0.361091	4.67749e-06	1.68094e-05
ABT1	0.249713	9.45768e-09	5.74269e-08
ABTB1	0.300713	0.000260454	0.000664583
ABTB2	-0.382153	5.03502e-07	2.18653e-06
AC004706.3	-0.382138	3.27876e-07	1.47403e-06
AC010255.2	1.90596	0.000165505	0.000440132
AC010422.8	0.329759	0.00551961	0.0105433
AC010980.1	0.584351	0.0238799	0.03939
AC011005.1	0.250928	0.0159712	0.0275129
AC013394.1	0.187551	0.0100726	0.0182115
AC021087.5	0.494095	0.0018177	0.00386971
AC040162.1	0.31978	0.00044752	0.00108676
AC073111.3	0.482598	0.000619363	0.00146023
AC079447.1	0.346398	4.19051e-05	0.000124928
AC090360.1	0.157196	3.72251e-05	0.000112172
AC092835.1	-0.238578	0.000481458	0.00116199
AC093323.1	0.500154	2.10171e-13	3.21089e-12
AC093512.2	-0.189497	0.0231853	0.0384056
AC096887.1	0.315321	0.000595458	0.00140874
AC099489.1	0.243357	0.00244906	0.00506202
AC112128.1	0.539553	8.7619e-07	3.63304e-06
AC114490.3	0.385221	1.17571e-05	3.89505e-05
AC136428.1	-1.26009	0.00170865	0.00366691
AC233723.1	0.799157	0.0271683	0.0441366
ACACA	-0.195631	1.89354e-05	6.02019e-05
ACAD10	0.17504	0.000100526	0.00027842
ACAD11	-0.340035	4.23352e-05	0.000126089
ACAD8	0.0930716	0.0214536	0.0358359
ACADS	0.314419	0.000852982	0.00195063
ACADVL	0.197919	0.0178952	0.0304826
ACAN	0.205095	0.00582568	0.0110673
ACAP2	-0.225136	0.000525105	0.0012565
ACAT1	0.381749	5.68157e-06	2.00684e-05
ACBD3	-0.146522	1.97533e-05	6.25994e-05
ACBD4	0.451848	0.00018606	0.000489156
ACBD5	-0.272577	3.78223e-08	2.0337e-07
ACBD6	0.514241	2.50636e-24	3.17135e-22
ACBD7	0.72014	0.000739237	0.00171197
ACCS	0.459391	0.00012704	0.000344615
ACD	0.430482	2.05944e-11	2.08334e-10
ACE	-0.434175	5.51469e-06	1.95317e-05
ACE2	-0.375163	1.71982e-05	5.52416e-05
ACER1	-1.1132	0.0178741	0.0304532
ACER2	-0.611371	3.40242e-13	4.95214e-12
ACKR2	-0.751261	5.50703e-08	2.8649e-07
ACKR4	-0.182061	0.000587229	0.00139053
ACLY	-0.157733	0.000169587	0.000449842
ACO1	-0.0816592	0.00540341	0.0103554
ACO2	-0.208697	3.7688e-07	1.67895e-06
ACOT11	-0.455271	1.17947e-06	4.77323e-06
ACOT8	0.281488	1.13239e-05	3.76824e-05
ACOX1	-0.24142	6.90848e-10	5.23137e-09
ACOX2	-0.0907861	0.0128529	0.0226842
ACP1	0.462027	2.06659e-30	8.31407e-28
ACP3	-0.663526	2.60897e-06	9.90436e-06
ACP5	0.0220715	0.0134319	0.023584
ACP6	0.512197	1.7873e-06	6.9654e-06
ACP7	-0.549331	0.0113678	0.0203121
ACRV1	0.354773	1.64824e-05	5.31134e-05
ACSF3	0.30849	6.23591e-05	0.000179723
ACSL1	-0.401462	2.044e-07	9.53342e-07
ACSL3	-0.0840453	0.0125162	0.0221597
ACSL4	-0.323027	1.29089e-07	6.26285e-07
ACSL5	-0.190513	0.00179274	0.00382487
ACSL6	0.853684	0.0175594	0.0299757
ACSM5	-0.650619	9.97925e-07	4.09345e-06
ACSS1	0.600455	4.37794e-06	1.58564e-05
ACSS3	-0.0625859	0.000282308	0.00071546
ACTA2	-0.113571	0.0187959	0.0318406
ACTBL2	-0.643848	0.000258092	0.000659953
ACTC1	-1.22599	0.0141504	0.0246935
ACTN1	-0.386955	2.92734e-05	8.99179e-05
ACTN4	-0.304627	2.8649e-11	2.81291e-10
ACTR1B	0.139971	0.000511758	0.00122831
ACTR2	-0.211565	6.04791e-06	2.12238e-05
ACTR3	-0.11851	0.00326544	0.00655428
ACTR3B	0.494512	1.60611e-12	2.02734e-11
ACTR5	0.270459	1.23475e-05	4.07087e-05
ACTR6	0.239111	6.59893e-07	2.80285e-06
ACVR1	-0.227163	2.68219e-06	1.01676e-05
ACVR1B	-0.144697	0.00106257	0.00238406
ACVRL1	-0.228151	0.00174734	0.00373818
ACYP1	0.541378	8.34658e-12	9.08798e-11
ACYP2	0.127196	0.00137784	0.00301427
ADA2	-0.828006	4.43397e-10	3.5012e-09
ADAM10	-0.312211	5.92936e-09	3.77717e-08
ADAM11	0.753667	0.000139247	0.000375134
ADAM12	-0.45868	0.00059408	0.0014059
ADAM17	-0.225681	6.32331e-06	2.21111e-05
ADAM19	-0.448207	8.56517e-06	2.92274e-05
ADAM23	0.0374614	0.00665883	0.0124883
ADAM28	-0.235968	0.0144819	0.0251852
ADAM33	-0.293465	0.0123837	0.0219524
ADAM9	-0.228763	3.92702e-06	1.43725e-05
ADAMDEC1	-0.94101	1.70275e-06	6.67735e-06
ADAMTS1	-0.145628	0.0183252	0.0311373
ADAMTS12	-0.578974	3.05952e-05	9.36478e-05
ADAMTS13	0.703567	7.13768e-05	0.000203618
ADAMTS15	-0.241353	0.000876409	0.00199896
ADAMTS18	0.766287	0.00339703	0.00678715
ADAMTS2	-0.598781	8.64069e-06	2.94531e-05
ADAMTS3	-0.281645	0.00436575	0.0085314
ADAMTS4	-0.434751	0.000712682	0.00165659
ADAMTS5	-0.309864	0.000220327	0.000570828
ADAMTS7	-0.365809	8.85024e-07	3.66483e-06
ADAMTS8	-0.599131	0.000615014	0.00145144
ADAMTS9	-0.182779	0.000773722	0.00178551
ADAMTSL1	-0.415845	2.00334e-05	6.33844e-05
ADAMTSL2	-0.0954667	0.0190512	0.032221
ADAMTSL3	0.187445	0.000729173	0.00169141
ADAMTSL4	-0.298198	0.000104233	0.000287875
ADAMTSL5	0.208704	0.00447922	0.0087314
ADAP1	0.860795	2.99686e-07	1.35741e-06
ADAP2	-0.37422	1.18936e-05	3.93609e-05
ADAR	-0.339348	4.49562e-14	7.70046e-13
ADARB1	-0.20704	0.00115851	0.00257867
ADAT1	-0.319186	5.89692e-12	6.6611e-11
ADAT2	0.455821	1.58297e-11	1.63507e-10
ADCK2	0.269387	0.000458216	0.0011105
ADCK5	0.576766	4.6083e-07	2.01798e-06
ADCY1	-0.27226	0.0127398	0.0225098
ADCY3	-0.151703	0.000126069	0.00034222
ADCY6	-0.273042	5.0625e-05	0.000148496
ADCY7	-0.722222	5.00031e-17	1.58816e-15
ADCY9	-0.395814	1.29682e-11	1.35738e-10
ADCYAP1	-0.771138	0.00117873	0.00261774
ADCYAP1R1	0.0882108	0.00301613	0.00609206
ADD1	-0.211231	1.00392e-07	4.97363e-07
ADGRA2	-0.778936	7.85426e-13	1.06053e-11
ADGRB3	0.249133	0.000572712	0.00135984
ADGRD1	-0.728227	7.75221e-06	2.66971e-05
ADGRD2	0.318951	0.021939	0.0365611
ADGRE2	-0.457676	4.04815e-09	2.63768e-08
ADGRE3	-0.729425	0.000198271	0.000518565
ADGRF2	-0.495556	0.000113772	0.000311558
ADGRF4	-0.382545	0.000170869	0.000452938
ADGRF5	-0.583897	2.90185e-11	2.84385e-10
ADGRG1	-0.354179	4.42289e-08	2.34285e-07
ADGRG2	-0.234075	0.024673	0.0405573
ADGRG5	-0.174843	0.0102581	0.0185062
ADGRG6	-0.154298	0.0219573	0.0365838
ADGRL1	0.490552	9.51452e-06	3.22077e-05
ADGRL2	-0.605389	1.51768e-09	1.07797e-08
ADGRL4	-0.337173	8.9202e-05	0.000250148
ADH1B	-1.66999	0.00190342	0.00403195
ADH5	0.192318	0.000363821	0.000900228
ADI1	0.394938	2.24513e-09	1.54095e-08
ADIPOR1	-0.189497	0.000101572	0.00028117
ADK	0.230282	0.00280731	0.00571961
ADM2	0.397887	0.00740086	0.0137501
ADM5	0.601087	0.000357766	0.000886224
ADNP	-0.15296	0.000108628	0.000298385
ADNP2	-0.132391	0.00491212	0.00949503
ADO	0.0910729	0.0252006	0.0412645
ADORA3	-0.172279	0.0158751	0.0273685
ADPGK	0.106548	0.000517785	0.00124088
ADPRH	-0.484181	7.07512e-10	5.34209e-09
ADPRM	0.377302	3.63918e-09	2.39709e-08
ADPRS	0.189734	0.00564897	0.0107681
ADRA1D	0.1976	0.0096337	0.0174844
ADRA2A	-0.643364	9.20336e-05	0.000257262
ADRA2B	0.695726	0.00168846	0.00362555
ADRA2C	0.542049	0.00941665	0.0171222
ADRM1	0.23488	1.43752e-05	4.69108e-05
ADSL	0.165691	0.00168123	0.00361102
AEBP1	-0.324148	0.00580332	0.0110275
AEBP2	-0.142226	0.0302122	0.0486085
AFAP1	-0.322269	4.70567e-06	1.68952e-05
AFAP1L1	-0.228683	0.00122956	0.00271906
AFAP1L2	-0.285144	0.00019558	0.00051221
AFDN	-0.469618	1.46748e-14	2.79766e-13
AFF1	-0.441735	3.4551e-17	1.14368e-15
AFF3	0.0550816	2.8744e-07	1.30534e-06
AFF4	-0.536907	1.10982e-20	7.19551e-19
AFMID	0.444845	2.76949e-15	6.12019e-14
AGA	-0.136332	0.0195382	0.0329275
AGAP2	-0.208178	8.78171e-05	0.000246617
AGAP3	0.208792	0.0126276	0.0223342
AGAP4	0.244502	0.000576421	0.00136741
AGAP9	0.30399	7.72436e-05	0.00021908
AGBL1	-1.95828	0.000598538	0.0014156
AGBL2	0.254281	0.00118437	0.0026284
AGBL5	0.382916	1.60271e-09	1.13375e-08
AGER	0.652001	4.6754e-09	3.01756e-08
AGFG1	-0.151383	0.000194608	0.000509834
AGL	-0.234937	0.000115847	0.000316882
AGMAT	0.399042	5.60526e-05	0.000162924
AGO2	-0.158975	0.001101	0.00246501
AGO4	-0.131279	0.000473591	0.00114547
AGPAT2	0.566752	1.25988e-05	4.14673e-05
AGPAT3	-0.164716	0.00237371	0.00492444
AGPAT5	0.257038	0.00376802	0.00745997
AGPS	-0.165433	2.33089e-05	7.27938e-05
AGRN	-0.330158	1.2929e-05	4.24917e-05
AGTR1	-0.949471	0.00286528	0.00582095
AHCTF1	-0.0949746	0.00994629	0.0179955
AHCY	0.488458	1.73299e-13	2.6736e-12
AHCYL1	-0.165724	1.05185e-06	4.29444e-06
AHCYL2	-0.398727	9.31189e-12	1.00692e-10
AHDC1	-0.257827	4.32916e-07	1.90638e-06
AHNAK	-0.499543	9.01007e-14	1.46041e-12
AHNAK2	-0.559715	2.00718e-09	1.39286e-08
AHSA1	0.260597	8.73736e-07	3.62382e-06
AIDA	-0.261691	7.90086e-08	3.98472e-07
AIFM1	0.295642	1.49951e-08	8.70417e-08
AIFM2	0.423909	2.60431e-07	1.19234e-06
AIFM3	0.73638	0.000644157	0.00151368
AIMP1	0.293327	5.66721e-12	6.41085e-11
AIMP2	0.143893	0.0159849	0.0275306
AIP	0.467371	6.61116e-08	3.3788e-07
AJAP1	-0.463712	0.0143312	0.0249674
AJM1	0.368935	1.45312e-06	5.78227e-06
AJUBA	-0.15343	0.0262002	0.0427142
AK2	0.248323	7.83227e-07	3.28315e-06
AK3	0.0679349	0.0258633	0.0422219
AK6	0.440696	1.63765e-13	2.54403e-12
AK8	0.671316	0.0012081	0.00267613
AKAP1	0.216851	0.00766898	0.0141944
AKAP10	-0.232023	1.36429e-12	1.75026e-11
AKAP11	-0.389531	3.05583e-12	3.62952e-11
AKAP12	-0.319506	5.07613e-05	0.00014884
AKAP13	-0.497136	1.00522e-17	3.76418e-16
AKAP5	-0.53055	1.03564e-07	5.11302e-07
AKAP6	-1.01834	5.95042e-08	3.07315e-07
AKAP8	0.153979	4.33854e-06	1.57391e-05
AKAP8L	0.250472	9.41094e-11	8.39441e-10
AKAP9	-0.268105	7.04585e-09	4.39735e-08
AKIP1	0.270342	0.000606599	0.00143293
AKNA	-0.438028	2.16472e-07	1.00427e-06
AKR1A1	0.342754	8.49028e-06	2.89908e-05
AKR1B15	-0.247947	0.00201926	0.00425037
AKR1E2	0.580283	1.05521e-06	4.30591e-06
AKR7A2	0.328831	0.000198524	0.000518967
AKR7A3	1.19707	1.01005e-10	8.96872e-10
AKT1	-0.18236	8.9202e-05	0.000250148
AKT1S1	0.148123	0.00948578	0.0172379
AKT2	-0.144633	0.000107513	0.000295737
AKT3	-0.0558377	0.000989398	0.0022349
AL031777.2	-0.334109	0.000339237	0.000844591
AL135905.2	-0.451608	2.97683e-06	1.11959e-05
AL136531.2	-0.666515	0.000113361	0.000310569
AL139353.1	0.615458	2.54548e-06	9.67974e-06
AL355312.5	-0.328435	0.000142102	0.000381852
AL358113.1	0.635045	1.19075e-06	4.81392e-06
AL360181.3	0.247061	0.0229575	0.0380768
AL365205.1	0.400227	0.0053565	0.0102755
ALAD	-0.106396	0.000694943	0.00161919
ALCAM	0.344674	0.0204422	0.0342852
ALDH16A1	0.281797	0.0114906	0.0205059
ALDH1A2	0.142316	0.000175212	0.000463197
ALDH1L2	-0.342787	5.78782e-05	0.000167764
ALDH3B1	-0.28334	0.00512747	0.00986754
ALDH3B2	-0.697881	6.47208e-05	0.00018612
ALDH4A1	-0.121608	0.000687016	0.00160287
ALDH6A1	-0.17996	0.0195382	0.0329275
ALDH8A1	2.18005	0.000666791	0.0015601
ALDH9A1	-0.31534	8.49128e-09	5.19814e-08
ALDOC	0.506968	2.41703e-05	7.52743e-05
ALG11	-0.275788	2.07181e-07	9.65162e-07
ALG12	-0.273881	2.16849e-09	1.49488e-08
ALG13	0.140408	0.000146127	0.000392254
ALG14	0.26146	8.33461e-05	0.000235029
ALG1L	0.498289	0.00122956	0.00271906
ALG1L2	0.43566	0.000332035	0.000828109
ALG3	0.351114	1.07558e-06	4.38332e-06
ALG5	0.327154	1.09274e-08	6.53146e-08
ALG6	0.184722	1.74446e-05	5.59956e-05
ALG8	0.220391	0.00249014	0.00514218
ALKAL2	1.33277	0.00175134	0.00374572
ALKBH2	0.663237	7.44047e-19	3.53761e-17
ALKBH3	0.355026	1.16829e-06	4.73287e-06
ALKBH4	0.274049	6.03468e-08	3.11256e-07
ALKBH5	-0.0952564	0.0187642	0.0317937
ALKBH6	0.391461	3.37829e-07	1.51704e-06
ALKBH7	0.793457	1.85302e-10	1.56059e-09
ALKBH8	-0.252738	1.90963e-05	6.06767e-05
ALOX12B	-0.84477	0.00306581	0.00618444
ALOX15B	-0.115899	0.0131744	0.0231785
ALOX5	-0.458764	1.11731e-07	5.48862e-07
ALOX5AP	-0.184199	0.00187879	0.003983
ALOXE3	-0.404743	0.027234	0.0442158
ALPK1	-0.234367	2.80863e-06	1.06136e-05
ALPK2	-0.284003	0.00652119	0.0122565
ALPK3	-0.89053	2.5062e-05	7.78659e-05
ALPL	-0.209115	0.000280253	0.000711285
ALYREF	0.593262	1.20592e-21	9.60454e-20
AMBRA1	-0.336148	1.16484e-13	1.85925e-12
AMD1	-0.110058	0.0233382	0.0386302
AMDHD2	0.573776	9.47043e-05	0.000263927
AMFR	-0.159773	0.00102996	0.00231886
AMH	1.24764	6.58044e-06	2.29591e-05
AMMECR1	-0.392332	8.79713e-10	6.50457e-09
AMN	0.782526	4.89288e-06	1.75033e-05
AMOT	-0.624714	0.00911108	0.0166243
AMOTL1	-0.284631	1.16895e-05	3.8759e-05
AMOTL2	-0.318319	3.91942e-08	2.10242e-07
AMPD1	-1.66798	2.80972e-06	1.06151e-05
AMPD3	-0.417558	3.73157e-07	1.66425e-06
AMPH	-0.148696	0.000229492	0.000592129
AMTN	-0.0862861	0.00323225	0.00649639
AMY2B	0.817102	0.000298543	0.000752352
AMZ1	-0.358836	0.0109078	0.0195615
AMZ2	0.294807	5.84509e-12	6.60731e-11
ANAPC1	-0.113557	0.00171399	0.00367686
ANAPC10	0.394542	1.96814e-12	2.44111e-11
ANAPC11	0.844766	2.06463e-24	2.65525e-22
ANAPC13	0.177908	0.00255294	0.00525664
ANAPC15	0.42959	2.37179e-08	1.33191e-07
ANAPC16	0.436027	4.48627e-18	1.80024e-16
ANAPC2	0.232211	0.000130658	0.000353392
ANAPC4	0.104512	0.000463653	0.00112281
ANAPC5	0.218177	5.97549e-12	6.745e-11
ANAPC7	0.314197	3.25607e-11	3.16529e-10
ANG	0.591506	3.84124e-05	0.00011537
ANGPT1	-0.349777	7.89008e-06	2.71006e-05
ANGPT2	-0.316975	0.000215474	0.000559825
ANGPT4	-0.297025	0.00250804	0.00517506
ANGPTL1	-1.03575	6.50645e-05	0.000186971
ANGPTL2	-0.520893	0.000228081	0.000588681
ANGPTL4	0.367856	0.0259892	0.0424142
ANGPTL7	-0.856975	3.29019e-05	0.000100122
ANK1	0.0208974	0.000398397	0.000977
ANK2	-0.739776	0.000159243	0.000425064
ANK3	-0.518364	3.12489e-12	3.70314e-11
ANKAR	0.251536	0.000197538	0.00051682
ANKDD1A	0.257674	0.000492908	0.00118652
ANKDD1B	0.253416	0.000326114	0.000814894
ANKEF1	-0.246198	1.03521e-06	4.23092e-06
ANKFY1	-0.678273	4.5149e-30	1.68664e-27
ANKHD1	0.442947	7.93745e-10	5.94456e-09
ANKHD1-EIF4EBP3	0.142171	0.0163463	0.0280852
ANKIB1	-0.199805	2.29899e-06	8.82799e-06
ANKLE1	0.838837	1.12587e-05	3.7489e-05
ANKMY1	0.265117	1.37731e-06	5.49871e-06
ANKRD10	0.228753	3.82145e-06	1.40385e-05
ANKRD11	-0.267675	1.58527e-10	1.35991e-09
ANKRD12	-0.24049	4.95367e-08	2.60466e-07
ANKRD13B	0.485443	1.0485e-06	4.28301e-06
ANKRD13C	-0.216339	3.45398e-10	2.78341e-09
ANKRD13D	0.310761	3.38428e-06	1.25709e-05
ANKRD16	0.438604	1.47066e-11	1.52509e-10
ANKRD17	-0.386427	4.2427e-14	7.31516e-13
ANKRD18A	0.456765	0.00173586	0.00371768
ANKRD18B	0.520432	0.00264428	0.0054257
ANKRD22	-0.269254	0.00370064	0.00733767
ANKRD23	0.802923	2.84028e-08	1.57192e-07
ANKRD24	0.368251	0.00654601	0.0122958
ANKRD26	-0.173261	0.00215115	0.0045026
ANKRD28	-0.144553	0.000862672	0.00196935
ANKRD31	-0.914221	0.000982683	0.00222092
ANKRD34B	0.811334	0.00919529	0.0167605
ANKRD36C	0.266999	0.0101655	0.0183603
ANKRD37	0.280768	0.00976686	0.0177036
ANKRD39	0.0281704	2.55921e-09	1.73601e-08
ANKRD40	-0.201737	5.69853e-06	2.01238e-05
ANKRD44	-0.502213	8.39697e-09	5.14844e-08
ANKRD49	0.1398	0.00103226	0.0023237
ANKRD50	-0.366108	1.10208e-10	9.73082e-10
ANKRD52	-0.211262	1.7541e-06	6.85646e-06
ANKRD54	0.356287	3.81101e-11	3.66389e-10
ANKRD65	0.590958	0.000105588	0.000291105
ANKS1A	-0.307383	2.48766e-11	2.47662e-10
ANKS3	0.638682	3.44139e-11	3.33511e-10
ANKS6	0.390256	1.90587e-11	1.93799e-10
ANKZF1	0.360315	4.70911e-10	3.68692e-09
ANO1	-0.387231	4.10049e-05	0.000122523
ANO2	-0.117718	0.0118028	0.02102
ANO5	-1.31479	0.000182313	0.00048011
ANO6	-0.385932	7.96894e-10	5.9653e-09
ANO7	0.604209	1.64824e-05	5.31134e-05
ANO9	0.414282	2.45096e-05	7.62706e-05
ANOS1	0.0915157	0.00854214	0.0156792
ANP32A	0.429964	2.81647e-17	9.56504e-16
ANP32B	0.556712	1.24201e-20	7.98655e-19
ANPEP	-0.334485	0.00181197	0.00386013
ANTKMT	0.835407	5.3272e-12	6.07441e-11
ANTXR1	-0.511965	1.96111e-09	1.36452e-08
ANTXR2	-0.570215	8.61898e-08	4.30949e-07
ANXA13	-0.487594	0.00418692	0.00821976
ANXA2	0.217074	0.00551962	0.0105433
ANXA2R	0.765788	0.000356053	0.000882399
ANXA5	-0.106896	0.00662103	0.0124219
ANXA7	-0.0578215	0.0253648	0.0414902
AOAH	-0.312405	8.78171e-05	0.000246617
AOC1	-0.923861	8.83112e-08	4.40994e-07
AOC2	0.354003	0.00788677	0.0145683
AOC3	-0.525246	8.41602e-06	2.8756e-05
AOPEP	0.388097	0.000302187	0.000760678
AOX1	-1.01076	4.6724e-14	7.97715e-13
AP001453.3	0.839091	1.66359e-11	1.71272e-10
AP002990.1	0.352769	0.00628946	0.0118665
AP003108.2	0.274944	0.000411892	0.0010071
AP006621.6	0.646083	1.74909e-07	8.26854e-07
AP1B1	-0.194766	8.36686e-06	2.86129e-05
AP1G1	-0.340055	3.23553e-16	8.82877e-15
AP1M2	0.327947	1.0179e-07	5.0397e-07
AP1S1	0.39702	2.76411e-10	2.26469e-09
AP2A1	-0.232696	6.15553e-10	4.71353e-09
AP2S1	0.64684	8.93582e-07	3.69734e-06
AP3B1	-0.257608	1.42426e-10	1.23122e-09
AP3M1	-0.106305	0.00730422	0.0135786
AP3M2	0.287402	5.76682e-06	2.03512e-05
AP3S1	0.206547	0.000693351	0.0016162
AP4B1	0.385616	3.47172e-08	1.88286e-07
AP4E1	-0.412889	2.53778e-14	4.60854e-13
AP4M1	0.278572	6.36752e-07	2.71706e-06
AP5M1	-0.259133	4.2937e-10	3.40588e-09
AP5Z1	0.195474	0.0206825	0.0346326
APAF1	-0.458277	8.9133e-12	9.65813e-11
APBA1	-0.311466	8.06773e-08	4.05844e-07
APBA3	0.15097	0.0132909	0.0233573
APBB1IP	-0.586002	2.01944e-10	1.68807e-09
APBB2	-0.303622	5.14847e-06	1.83381e-05
APBB3	0.253491	0.000445409	0.00108214
APC	-0.393196	4.2244e-15	8.99333e-14
APCDD1	-0.53301	4.78272e-09	3.08429e-08
APCDD1L	-0.299312	0.00672225	0.0125997
APEH	0.238052	0.0154961	0.026768
APELA	-0.722316	0.000225186	0.000582262
APEX1	0.22015	3.85706e-07	1.71437e-06
APEX2	0.131209	0.00945116	0.0171789
APH1A	0.18179	7.91093e-09	4.87711e-08
APIP	0.190776	0.000217618	0.000564742
APLNR	-0.405336	0.0072905	0.0135563
APMAP	0.281713	6.15355e-05	0.000177578
APOBEC2	-1.44608	0.00762503	0.014125
APOBEC3A	0.113569	0.0299261	0.0481678
APOBEC3D	-0.572344	2.82089e-06	1.06522e-05
APOBEC3G	-0.0932889	0.00290108	0.00588695
APOBR	-0.0514609	0.019604	0.0330241
APOL1	-0.305251	0.0023936	0.00495979
APOL2	-0.198773	0.0177437	0.0302542
APOL3	-0.220175	0.000669872	0.00156566
APOL4	-0.587238	0.000241973	0.000621367
APOL6	-0.846458	3.17045e-17	1.06519e-15
APOLD1	-0.311394	0.000181465	0.000477958
APOM	0.47207	2.26252e-09	1.55085e-08
APOO	0.311136	5.64782e-06	1.99717e-05
APOOL	-0.26369	4.01303e-07	1.77866e-06
APP	-0.253744	1.71992e-05	5.52416e-05
APPBP2	-0.188299	5.55383e-07	2.40054e-06
APPL1	-0.179491	3.36869e-05	0.000102273
APRT	0.561744	3.04088e-08	1.6735e-07
APTX	0.316485	1.93223e-06	7.49858e-06
AQP1	-0.466227	4.37794e-06	1.58564e-05
AQP11	0.272034	0.003598	0.00715133
AQP3	-0.559497	1.62961e-05	5.25563e-05
AQP9	-0.670442	0.00663361	0.0124425
AQR	-0.275294	2.49123e-09	1.6921e-08
AR	-0.430886	4.09682e-06	1.49452e-05
ARAP2	-0.503236	2.46459e-12	3.00461e-11
ARCN1	-0.126374	0.000345937	0.000859502
AREL1	-0.250417	1.18958e-08	7.04055e-08
ARF3	-0.122258	0.00218762	0.00457346
ARF5	0.363385	6.8266e-10	5.17937e-09
ARF6	-0.13859	0.00431426	0.00844235
ARFGAP1	0.380466	0.00010696	0.000294421
ARFGEF1	-0.345063	1.08671e-12	1.42563e-11
ARFGEF2	-0.473008	4.10216e-17	1.32981e-15
ARFIP1	-0.123937	0.000900431	0.00204928
ARFIP2	0.207377	0.000108069	0.000297006
ARFRP1	0.443556	0.000603796	0.00142717
ARGLU1	0.251976	4.86362e-06	1.74105e-05
ARHGAP1	-0.423217	1.10294e-14	2.16855e-13
ARHGAP11B	0.554174	5.70054e-07	2.46062e-06
ARHGAP15	-0.222152	9.82088e-05	0.00027287
ARHGAP17	-0.246684	9.59493e-10	7.03808e-09
ARHGAP18	-0.38278	3.1479e-09	2.10083e-08
ARHGAP19	0.264579	0.00012415	0.000337417
ARHGAP20	-0.807702	1.26864e-12	1.63289e-11
ARHGAP21	-0.292158	4.79845e-08	2.53153e-07
ARHGAP23	-0.247438	8.41602e-06	2.8756e-05
ARHGAP24	-0.137786	0.00128757	0.00283338
ARHGAP25	-0.475219	2.09518e-11	2.11677e-10
ARHGAP26	-0.28502	1.91503e-05	6.08235e-05
ARHGAP27	-0.0456409	0.0269289	0.0437839
ARHGAP28	-0.412214	8.59028e-06	2.93067e-05
ARHGAP29	-0.337792	7.80707e-07	3.27346e-06
ARHGAP30	-0.384742	9.61892e-07	3.95495e-06
ARHGAP31	-0.820652	1.41856e-15	3.33191e-14
ARHGAP32	-0.497678	6.14254e-11	5.69937e-10
ARHGAP33	0.250195	0.0178042	0.0303441
ARHGAP35	-0.263714	1.69896e-09	1.19806e-08
ARHGAP39	0.185491	0.00557319	0.0106366
ARHGAP4	0.567101	0.0186378	0.0316069
ARHGAP42	-0.403517	2.40987e-12	2.94707e-11
ARHGAP5	-0.682255	8.18908e-19	3.87008e-17
ARHGAP6	-0.490875	8.86184e-08	4.41965e-07
ARHGAP8	0.304353	0.0267774	0.0435782
ARHGAP9	-0.00166976	0.00957283	0.017384
ARHGDIB	-0.15137	0.00349795	0.0069728
ARHGEF10	0.230917	0.00959903	0.0174255
ARHGEF10L	-0.473947	4.91931e-12	5.64623e-11
ARHGEF11	-0.329598	1.66726e-11	1.71424e-10
ARHGEF12	-0.5186	1.50793e-15	3.526e-14
ARHGEF15	-0.405272	4.28245e-05	0.000127426
ARHGEF16	0.229541	0.000605196	0.00143005
ARHGEF17	-0.332847	1.82527e-05	5.82557e-05
ARHGEF18	0.153299	0.00840107	0.0154438
ARHGEF19	0.323905	0.000100007	0.000277178
ARHGEF3	-0.23641	1.82798e-07	8.60002e-07
ARHGEF37	-0.460335	0.000156061	0.000417564
ARHGEF39	0.286377	0.000130658	0.000353392
ARHGEF4	-0.199096	0.0119937	0.0213285
ARHGEF40	-0.14312	0.000856846	0.00195833
ARHGEF6	-0.790539	2.22485e-14	4.12136e-13
ARHGEF7	-0.116683	0.000663737	0.00155503
ARID1A	-0.348201	1.18154e-13	1.88207e-12
ARID1B	-0.364513	1.4832e-16	4.26997e-15
ARID2	-0.251002	1.06465e-07	5.24633e-07
ARID4A	-0.262889	3.112e-09	2.07952e-08
ARID4B	-0.158872	4.70755e-05	0.000139073
ARID5B	-0.478979	1.50396e-14	2.86026e-13
ARIH1	-0.150013	0.0002928	0.000739422
ARL11	-0.137374	0.0264127	0.0430249
ARL13B	-0.22752	0.000387159	0.000952121
ARL14	-0.52692	0.00039176	0.000962188
ARL14EP	0.202011	0.000378927	0.000934217
ARL15	-0.184858	0.000223068	0.000577356
ARL16	0.784325	2.54533e-23	2.68028e-21
ARL2	0.676569	1.64767e-06	6.4808e-06
ARL2BP	-0.348401	0.00017168	0.000454933
ARL3	0.638894	9.8937e-15	1.96745e-13
ARL4A	0.379766	4.9815e-05	0.000146339
ARL5A	-0.156188	0.0109274	0.0195945
ARL5B	-0.0954276	0.00088435	0.00201532
ARL6	-0.101943	0.00235398	0.00488738
ARL6IP1	0.140898	0.00645947	0.0121522
ARL6IP4	1.06727	2.86774e-15	6.31064e-14
ARL6IP5	-0.159441	0.00113067	0.00252386
ARL9	0.800404	0.0011975	0.0026549
ARMC10	0.314268	5.37452e-12	6.11503e-11
ARMC12	0.927913	4.29487e-08	2.28352e-07
ARMC6	0.373055	1.23252e-10	1.07734e-09
ARMC7	0.358963	8.86184e-08	4.41965e-07
ARMCX1	-0.187174	0.00726314	0.0135118
ARMCX4	-0.212939	0.00193962	0.00409977
ARMCX5	0.151859	0.000131998	0.000356708
ARMH3	-0.118587	0.00297327	0.00601555
ARMT1	-0.0968184	0.00589322	0.0111875
ARNT	-0.20859	3.55693e-09	2.34685e-08
ARPC1A	0.805809	2.54183e-15	5.66495e-14
ARPC1B	0.297278	0.000595459	0.00140874
ARPC3	0.414929	4.53425e-11	4.30384e-10
ARPC4	0.527306	1.23831e-05	4.08004e-05
ARPC5	0.154819	0.00296719	0.0060048
ARPC5L	0.475664	1.62303e-07	7.71207e-07
ARPIN	-0.259654	8.99331e-07	3.71623e-06
ARPP19	-0.177914	6.51353e-06	2.27358e-05
ARPP21	-1.47062	0.0289475	0.046727
ARRB1	-0.379787	1.36365e-07	6.58126e-07
ARRDC1	0.455677	2.40633e-08	1.34937e-07
ARRDC2	0.467126	5.18636e-05	0.000151732
ARRDC3	-0.359198	7.99993e-09	4.92231e-08
ARRDC4	-0.580428	1.28482e-06	5.16232e-06
ARSB	-0.391921	1.93097e-09	1.34534e-08
ARSD	-0.194828	0.00589322	0.0111875
ARSF	-0.786924	0.0103051	0.0185783
ARSI	-0.210398	0.000345107	0.000857846
ARSJ	-0.116233	0.00658343	0.0123572
ART3	0.332752	0.02688	0.0437179
ARTN	0.550472	4.99662e-06	1.7854e-05
ARV1	0.190405	0.00030292	0.000762403
ARVCF	0.29694	0.00431426	0.00844235
ASAH1	-0.164916	0.000868535	0.00198215
ASAH2B	0.224776	8.99022e-05	0.000251842
ASAP1	-0.339792	2.90185e-11	2.84385e-10
ASAP2	-0.403767	5.46835e-08	2.85044e-07
ASAP3	-0.0900377	0.006735	0.0126221
ASB1	0.21304	5.37034e-05	0.000156735
ASB13	0.294299	0.000348441	0.000864627
ASB2	-0.132953	0.00167044	0.00358981
ASB3	0.0939101	0.0152831	0.0264175
ASB5	-1.34708	0.0229307	0.03804
ASB6	0.256143	4.35164e-06	1.57793e-05
ASB7	-0.11849	0.0001232	0.000335068
ASB8	-0.179121	4.66346e-06	1.67743e-05
ASCC1	0.158435	0.0105023	0.0188969
ASCC3	-0.437069	4.95048e-14	8.39708e-13
ASF1B	0.275296	2.24767e-05	7.04332e-05
ASGR1	0.689685	0.00282468	0.00575051
ASGR2	0.0786324	0.0261156	0.042594
ASH1L	-0.362131	7.29517e-11	6.67801e-10
ASIC1	0.537869	0.0036125	0.00717652
ASIC3	0.626507	2.56102e-07	1.17355e-06
ASL	0.142731	0.0130588	0.0229854
ASNS	0.467612	0.000122884	0.00033427
ASNSD1	0.23588	1.06875e-06	4.35888e-06
ASPA	-0.595541	6.72311e-06	2.34152e-05
ASPH	-0.198172	3.17981e-05	9.6989e-05
ASPHD1	0.988084	6.15553e-10	4.71353e-09
ASPN	-0.327717	0.0254473	0.0416165
ASPSCR1	0.739989	2.37047e-14	4.37047e-13
ASXL2	-0.341476	1.21498e-11	1.28111e-10
ATAD2B	-0.132585	0.000520214	0.00124613
ATAD3A	0.608243	1.41596e-07	6.81066e-07
ATAD3B	0.713314	4.50203e-08	2.38236e-07
ATAD3C	0.504747	0.0121225	0.0215355
ATAT1	0.339037	9.68221e-06	3.26908e-05
ATE1	-0.19051	3.27273e-06	1.21969e-05
ATF4	0.485994	2.64014e-17	9.00517e-16
ATF6	-0.162182	1.22911e-06	4.9537e-06
ATF6B	-0.177373	0.000129662	0.000351
ATF7	-0.134384	0.000261092	0.000666104
ATF7IP	-0.35533	2.02772e-14	3.7785e-13
ATF7IP2	0.37669	0.00180041	0.00383914
ATG101	0.389717	4.00381e-13	5.73697e-12
ATG12	0.218413	7.79791e-06	2.68427e-05
ATG14	-0.177066	0.000277534	0.000705068
ATG16L2	0.294262	7.24468e-06	2.51091e-05
ATG2A	-0.261398	6.94332e-08	3.53933e-07
ATG2B	-0.449425	1.84558e-19	9.78282e-18
ATG3	0.0935007	0.0137903	0.0241457
ATG4A	-0.126651	0.00105785	0.00237552
ATG4B	0.389409	9.55719e-10	7.01367e-09
ATG4D	0.206566	0.00129039	0.0028376
ATG5	0.148099	0.0025371	0.00522815
ATG7	-0.019099	0.0247535	0.0406598
ATG9A	-0.539806	8.12196e-18	3.10814e-16
ATIC	0.319727	6.45075e-07	2.75033e-06
ATL1	-0.260467	6.15355e-05	0.000177578
ATL3	-0.166397	0.000666798	0.0015601
ATM	-0.313896	1.33591e-07	6.46928e-07
ATMIN	-0.166077	2.37028e-05	7.39209e-05
ATN1	-0.0415494	0.0106552	0.01915
ATOX1	0.645395	4.10049e-05	0.000122523
ATP10A	-0.464723	1.02321e-05	3.43845e-05
ATP10B	-1.04658	7.84369e-10	5.87715e-09
ATP10D	-0.584208	5.58915e-15	1.15539e-13
ATP11A	-0.484866	6.85379e-10	5.19748e-09
ATP11B	-0.400139	9.31829e-09	5.67122e-08
ATP12A	-0.669437	0.00161727	0.00348734
ATP13A2	-0.140754	0.00224811	0.00468618
ATP13A3	-0.27894	1.75437e-05	5.62447e-05
ATP13A5	0.396037	0.0152038	0.0262951
ATP1A1	-0.307458	9.16794e-07	3.7844e-06
ATP1A2	-1.65747	0.000128341	0.000347783
ATP1B2	-0.233536	0.00109856	0.0024613
ATP1B4	-1.51868	0.000566727	0.00134584
ATP23	0.284501	3.41211e-07	1.53091e-06
ATP2A2	-0.443173	9.27757e-15	1.85197e-13
ATP2A3	-0.205415	0.00446159	0.00870352
ATP2B2	-0.459406	0.0277989	0.045035
ATP2B4	-0.299953	3.55963e-08	1.92655e-07
ATP2C1	-0.236607	2.63484e-05	8.16203e-05
ATP5F1A	0.211239	2.72407e-05	8.40689e-05
ATP5F1B	0.240224	4.64015e-09	2.99851e-08
ATP5F1C	0.399951	3.13888e-12	3.71691e-11
ATP5F1D	0.937937	3.57255e-12	4.18621e-11
ATP5F1E	0.892712	2.78744e-18	1.1419e-16
ATP5IF1	0.523301	8.06416e-10	6.01935e-09
ATP5MC1	0.762811	6.3849e-21	4.51257e-19
ATP5MC2	0.560196	2.23455e-28	5.94238e-26
ATP5MC3	0.499191	8.60667e-17	2.61703e-15
ATP5MD	0.786184	7.67981e-21	5.3082e-19
ATP5ME	1.46642	3.5209e-19	1.75933e-17
ATP5MF	0.858795	5.83928e-22	4.74706e-20
ATP5MG	0.873736	8.77286e-16	2.1814e-14
ATP5MPL	0.854885	3.5103e-21	2.57367e-19
ATP5PB	0.292835	4.01831e-08	2.14885e-07
ATP5PD	0.565541	1.17747e-17	4.28644e-16
ATP5PF	0.645819	8.39313e-18	3.19632e-16
ATP5PO	1.11951	1.80193e-20	1.13543e-18
ATP6AP1L	0.351283	0.0104455	0.0188098
ATP6V0A1	-0.157006	5.14476e-05	0.000150656
ATP6V0A2	-0.0518092	0.0250779	0.0411067
ATP6V0A4	-0.310127	0.000373515	0.000921925
ATP6V0B	0.49582	1.4781e-10	1.27285e-09
ATP6V0D1	0.00180087	0.0221396	0.0368446
ATP6V0D2	-0.505316	0.00855791	0.0157027
ATP6V0E1	0.252892	4.64446e-05	0.000137364
ATP6V1A	-0.360385	3.50941e-12	4.12146e-11
ATP6V1B2	-0.194217	8.69139e-06	2.96194e-05
ATP6V1E1	0.167973	0.00654602	0.0122958
ATP6V1E2	0.408992	1.3345e-06	5.3496e-06
ATP6V1F	0.32076	1.4089e-08	8.21468e-08
ATP7A	-0.599118	1.5624e-19	8.45311e-18
ATP7B	-0.457871	0.000712682	0.00165659
ATP8A1	-0.59385	1.57836e-08	9.12809e-08
ATP8B2	-0.353529	6.04484e-07	2.59277e-06
ATP8B4	-0.460325	8.06416e-10	6.01935e-09
ATP9A	-0.651231	1.46766e-16	4.23302e-15
ATP9B	-0.194255	5.92336e-06	2.08474e-05
ATPAF1	0.16345	9.47043e-05	0.000263927
ATPAF2	0.252201	0.00156259	0.00337886
ATPSCKMT	0.370407	3.14544e-06	1.17617e-05
ATR	-0.190072	2.83964e-05	8.7498e-05
ATRAID	0.496094	5.19815e-22	4.2701e-20
ATRIP	0.500337	2.71004e-11	2.67089e-10
ATRN	-0.159181	0.000204029	0.000532207
ATRX	-0.33862	4.94115e-12	5.66301e-11
ATXN1	-0.489909	5.26377e-18	2.09085e-16
ATXN10	0.19635	1.41307e-05	4.61896e-05
ATXN1L	-0.433852	1.26385e-17	4.55858e-16
ATXN2	-0.100277	0.00124588	0.00275051
ATXN2L	-0.180779	1.23831e-05	4.08004e-05
ATXN7	-0.339365	4.89757e-12	5.62539e-11
ATXN7L1	-0.15418	5.42818e-05	0.000158276
ATXN7L2	0.300806	1.86712e-06	7.26026e-06
ATXN7L3	-0.154751	4.95477e-05	0.000145663
ATXN7L3B	-0.0518117	0.0213116	0.0356176
AUNIP	0.346926	8.84598e-09	5.39632e-08
AUP1	0.388354	2.10574e-19	1.0904e-17
AURKA	0.170428	0.0269289	0.0437839
AURKAIP1	0.81574	2.24582e-10	1.86438e-09
AURKB	0.536237	3.02219e-10	2.46456e-09
AURKC	0.85047	1.59296e-05	5.14588e-05
AUTS2	-0.0976213	0.018109	0.0307901
AVEN	0.28323	0.000384397	0.000946068
AVL9	-0.0616735	0.0244726	0.0402743
AVPI1	0.269286	0.00696824	0.0130312
AVPR1A	-0.909154	3.2357e-14	5.75602e-13
AXDND1	0.451385	0.000986546	0.00222911
AXIN1	0.184317	3.10197e-05	9.48178e-05
AXIN2	-0.171049	7.47205e-08	3.78793e-07
AXL	-0.320505	0.000137488	0.000370713
AZI2	-0.104547	0.00146436	0.00318136
B2M	-0.158421	0.0041056	0.0080733
B3GALNT2	0.12207	0.0015193	0.00328979
B3GALT2	-0.00513881	3.41863e-05	0.000103649
B3GALT6	0.479442	1.48341e-05	4.82278e-05
B3GAT3	0.507893	2.14351e-09	1.47962e-08
B3GNT10	-0.15297	0.000906531	0.00206197
B3GNT2	-0.12363	0.00323246	0.00649639
B3GNT4	0.501781	0.000248602	0.00063693
B3GNT5	-0.335855	1.2312e-05	4.06173e-05
B3GNT7	-0.328545	0.00172135	0.00368962
B3GNT9	-0.469219	7.95881e-14	1.30621e-12
B3GNTL1	0.468142	1.58739e-14	3.008e-13
B4GALNT4	1.32089	3.86983e-07	1.71956e-06
B4GALT1	-0.226655	1.8882e-05	6.00687e-05
B4GALT2	0.369684	8.82189e-07	3.65502e-06
B4GALT3	0.195881	1.76434e-05	5.65179e-05
B4GALT5	-0.176965	0.00255294	0.00525664
B4GALT7	0.339407	0.000780796	0.00180051
B9D1	0.502027	4.44464e-07	1.95176e-06
B9D2	0.521617	1.02535e-06	4.19938e-06
BABAM1	0.992826	2.32851e-25	3.60552e-23
BABAM2	0.24881	2.39689e-05	7.47211e-05
BACE1	-0.239961	1.62499e-05	5.24287e-05
BACH1	-0.385366	8.95211e-11	8.01247e-10
BAD	0.586117	4.56036e-10	3.59016e-09
BAG1	0.581096	9.34961e-06	3.16768e-05
BAG3	-0.14445	0.00727681	0.0135324
BAG5	-0.134649	0.000564484	0.00134132
BAIAP2L1	0.256118	8.94918e-06	3.04121e-05
BAIAP3	0.307802	0.0125606	0.0222308
BANF1	0.514075	2.38205e-14	4.38667e-13
BANK1	-0.013863	0.0177437	0.0302542
BANP	0.120014	0.000373529	0.000921925
BATF2	-0.41541	0.000240194	0.0006169
BAX	0.525967	1.25145e-12	1.61607e-11
BAZ1A	-0.176942	0.00040221	0.000985272
BAZ1B	-0.12011	0.00175484	0.00375165
BAZ2A	-0.342966	2.37762e-12	2.91444e-11
BAZ2B	-0.350997	6.40605e-11	5.92985e-10
BBC3	0.575663	2.8826e-09	1.94028e-08
BBIP1	0.180098	0.000820787	0.00188387
BBOX1	-0.795685	3.81899e-07	1.69986e-06
BBS1	0.153626	0.0254061	0.0415533
BBS10	-0.12945	0.000164132	0.000436998
BBS12	-0.156596	4.12282e-05	0.000123096
BBS5	0.322363	1.58392e-05	5.11879e-05
BBS9	-0.136077	9.54452e-05	0.000265756
BBX	-0.424084	5.41002e-13	7.55188e-12
BCAN	0.940598	0.00381356	0.00754251
BCAP31	0.317327	0.000123516	0.000335753
BCAS1	-0.193357	0.000321812	0.000805172
BCAS2	0.234963	1.03192e-06	4.21965e-06
BCAS4	0.745958	4.22521e-10	3.35663e-09
BCAT2	0.429131	1.44026e-08	8.37882e-08
BCCIP	0.394891	4.71457e-18	1.88223e-16
BCDIN3D	0.297471	9.82411e-06	3.312e-05
BCKDHA	0.394025	0.000559898	0.00133103
BCL11A	0.478888	2.04893e-05	6.47096e-05
BCL11B	-0.373217	1.58479e-07	7.54638e-07
BCL2	-0.0326768	0.0128076	0.0226092
BCL2L1	0.202811	0.00384419	0.00759544
BCL2L11	-0.0507194	0.0271902	0.044163
BCL2L12	0.518812	5.47677e-14	9.20028e-13
BCL2L13	-0.126103	0.00237371	0.00492444
BCL2L14	-0.0989298	0.0239975	0.0395506
BCL2L2	-0.169998	0.00247466	0.00511359
BCL7B	0.225435	1.24874e-06	5.02892e-06
BCL7C	0.787927	5.35122e-16	1.38321e-14
BCL9	-0.161171	0.000151017	0.000404758
BCL9L	-0.603012	2.29093e-14	4.2288e-13
BCLAF1	-0.0583858	0.0184497	0.0313251
BCLAF3	-0.115209	0.0187642	0.0317937
BCOR	-0.395466	2.73239e-13	4.07134e-12
BCORL1	-0.172983	0.000967506	0.00218955
BCS1L	0.461396	1.06548e-14	2.10546e-13
BDH2	0.22731	0.000657654	0.00154216
BDKRB2	-0.262004	0.000807861	0.00185692
BDP1	-0.357096	1.25798e-11	1.3229e-10
BEAN1	-0.10891	0.000490598	0.00118241
BECN1	-0.215717	4.06142e-08	2.16895e-07
BEND3	-0.0598467	0.016801	0.0287781
BEND6	-0.248299	0.00580332	0.0110275
BEST1	-0.145478	0.00172505	0.00369602
BEST3	-0.953357	0.00559602	0.010675
BEST4	0.850439	9.70905e-10	7.11181e-09
BET1	0.371486	3.33059e-10	2.69643e-09
BET1L	0.106214	0.0200025	0.0336232
BEX2	0.631053	0.00123633	0.00273212
BEX3	0.322175	0.00027217	0.000692002
BEX5	0.663757	0.00440023	0.00859373
BFAR	0.125037	0.0148133	0.0256931
BGN	-0.101888	0.0234919	0.0388478
BHLHA15	-0.444451	0.013326	0.0234112
BHLHE22	-0.58385	2.0884e-06	8.05285e-06
BHLHE40	-0.186389	7.76505e-05	0.000220075
BHLHE41	-0.290655	0.0100919	0.018238
BHMT2	-0.391652	0.00304398	0.00614356
BICC1	-0.622135	3.20359e-06	1.1962e-05
BICD2	-0.282764	0.000230912	0.000595498
BICRAL	-0.394267	8.38798e-14	1.36806e-12
BID	0.478141	3.51025e-10	2.82585e-09
BIK	0.623239	4.7e-07	2.05469e-06
BIN2	-0.384319	3.01691e-07	1.36571e-06
BIN3	0.159374	0.00352628	0.0070248
BIRC5	0.658215	5.13442e-16	1.33597e-14
BIRC6	-0.330546	9.35269e-12	1.01063e-10
BIVM	0.352174	2.94963e-09	1.98115e-08
BLCAP	0.151396	0.00878196	0.0160743
BLMH	0.310002	3.24162e-05	9.87593e-05
BLNK	-0.428285	2.89608e-06	1.09203e-05
BLOC1S1	1.10403	9.6959e-19	4.46125e-17
BLOC1S2	0.137784	0.0113271	0.0202464
BLOC1S4	0.28877	1.57195e-06	6.21412e-06
BLVRA	0.292322	8.89704e-06	3.0248e-05
BLVRB	0.372784	0.0121657	0.0216025
BLZF1	-0.283902	5.11811e-07	2.22077e-06
BMF	-0.195116	0.000400299	0.000981511
BMI1	0.202399	0.0189232	0.0320286
BMP2	-0.197009	0.0105213	0.0189268
BMP2K	-0.758979	4.51463e-22	3.72813e-20
BMP4	0.0473852	1.20214e-06	4.85621e-06
BMP6	-0.389381	1.56211e-06	6.18457e-06
BMPR2	-0.480898	2.33207e-17	8.02415e-16
BMS1	0.122824	0.00319329	0.00642342
BMX	-0.116023	0.000107236	0.000295078
BNC1	-0.244107	0.00082265	0.00188759
BNC2	-0.282031	3.83079e-05	0.000115078
BNIP1	0.513726	1.88134e-12	2.34458e-11
BNIPL	-0.342209	0.0145324	0.0252591
BOC	-0.470297	8.34658e-12	9.08798e-11
BOD1	0.50262	2.98448e-19	1.52034e-17
BOD1L1	-0.373291	1.10469e-15	2.66245e-14
BOLA1	0.704536	7.76764e-11	7.04883e-10
BOLA2B	0.913247	4.58245e-11	4.34171e-10
BOLA3	0.551357	8.2819e-19	3.90219e-17
BOP1	0.597742	5.11775e-06	1.82494e-05
BORCS7	0.224177	7.74468e-05	0.000219577
BORCS8	0.507547	2.50098e-14	4.55753e-13
BPGM	-0.164042	0.0247939	0.0407091
BPHL	0.118531	0.0111657	0.0199852
BPIFC	-1.17304	9.06279e-06	3.07383e-05
BPNT1	0.118352	0.00159666	0.00344778
BPNT2	-0.0967319	0.0308403	0.0495378
BPTF	-0.323389	1.92237e-11	1.95349e-10
BRAP	0.138419	9.27551e-05	0.000258817
BRAT1	0.369943	3.32588e-08	1.8094e-07
BRCC3	-0.0761528	0.00873352	0.0159931
BRD1	-0.169458	3.72769e-05	0.000112303
BRD3	-0.247888	2.19787e-05	6.89691e-05
BRD7	0.114542	0.00573671	0.0109181
BRD9	0.375729	4.10168e-14	7.0876e-13
BRF1	0.148695	0.000854912	0.00195476
BRI3	0.554113	2.27313e-12	2.79072e-11
BRICD5	0.860516	6.93753e-11	6.37294e-10
BRINP1	-0.472757	0.00290861	0.00590071
BRIX1	0.584591	2.01753e-21	1.53665e-19
BRK1	0.359384	4.11961e-08	2.19629e-07
BRMS1	0.454734	0.00404079	0.00795483
BROX	-0.103204	7.00698e-05	0.000200291
BRPF1	-0.0708324	0.00228131	0.00474845
BRPF3	-0.356827	3.02811e-13	4.46533e-12
BRSK2	0.883194	1.46227e-05	4.7633e-05
BRWD1	-0.161523	0.000285766	0.000723755
BRWD3	-0.191654	3.31366e-05	0.000100817
BSCL2	-0.164208	0.0279873	0.0452936
BSG	0.27664	0.000146127	0.000392254
BTAF1	-0.234466	4.74826e-06	1.70403e-05
BTBD16	1.34382	1.28548e-05	4.22567e-05
BTBD2	0.309212	8.74784e-09	5.34061e-08
BTBD3	-0.0994914	0.00373794	0.00740508
BTBD6	0.242665	9.61915e-05	0.000267691
BTBD7	-0.36028	1.04777e-12	1.378e-11
BTBD8	-0.180101	0.00265533	0.00544604
BTBD9	-0.330467	5.25627e-09	3.36891e-08
BTD	-0.15797	0.000259182	0.000662009
BTF3	0.429476	3.82207e-13	5.49664e-12
BTF3L4	0.196882	2.51432e-06	9.57981e-06
BTG2	-0.221171	5.44273e-05	0.00015867
BTG3	0.153544	0.00204935	0.00430793
BTK	-0.396467	2.02339e-07	9.44288e-07
BTLA	-0.475566	7.30715e-07	3.08197e-06
BTN2A2	-0.0955449	0.00493136	0.00952986
BTN3A1	-0.452061	1.22518e-08	7.23215e-08
BTN3A2	-0.317734	4.88854e-05	0.000143878
BTN3A3	-0.487374	3.5343e-08	1.91416e-07
BTRC	-0.172891	0.000140312	0.000377616
BUB1	0.17204	0.0242341	0.0399236
BUB3	0.251517	5.23648e-09	3.35759e-08
BUD13	0.242455	6.15553e-10	4.71353e-09
BUD23	0.542006	3.63899e-21	2.65562e-19
BUD31	0.516155	5.44923e-23	5.31046e-21
BVES	-0.494578	1.82679e-06	7.11048e-06
BX255925.3	0.359479	0.000391805	0.000962188
BYSL	0.334312	1.19695e-07	5.84323e-07
BZW1	-0.170384	0.00106021	0.00237944
BZW2	0.401953	8.18515e-13	1.10047e-11
C10orf71	-1.94918	0.000753798	0.00174312
C10orf88	0.103052	0.00542437	0.0103879
C10orf99	-0.694678	0.000131662	0.000355923
C11orf1	0.621363	7.53651e-13	1.01938e-11
C11orf16	1.0712	0.000129277	0.000350018
C11orf21	-0.0482126	0.000573742	0.00136148
C11orf45	-0.195829	0.0273656	0.044402
C11orf49	0.215783	0.000815224	0.00187275
C11orf65	0.23268	0.00173988	0.00372425
C11orf68	0.200995	0.00802009	0.0147954
C12orf43	0.167985	0.000272835	0.000693468
C12orf45	0.626647	1.1294e-24	1.4891e-22
C12orf56	0.381304	0.0109865	0.019687
C12orf57	1.28776	3.16963e-21	2.35694e-19
C12orf60	0.466825	3.82289e-08	2.05274e-07
C12orf65	0.242509	1.15499e-08	6.86429e-08
C12orf73	0.640329	1.02763e-23	1.15997e-21
C12orf76	0.473885	6.74966e-16	1.71363e-14
C14orf119	0.262712	8.09796e-05	0.00022889
C14orf132	-0.0997183	0.0150988	0.0261393
C14orf28	0.261541	5.35597e-05	0.000156403
C14orf93	0.346248	7.36547e-13	9.97103e-12
C15orf39	-0.166987	0.000159243	0.000425064
C15orf40	0.252318	1.71076e-06	6.70374e-06
C15orf61	0.650605	3.11971e-17	1.05265e-15
C16orf54	-0.648492	5.73202e-09	3.65888e-08
C16orf70	-0.224101	1.87188e-07	8.79598e-07
C16orf72	-0.132742	0.00191101	0.00404639
C16orf74	0.701261	7.18839e-10	5.4224e-09
C16orf86	0.726778	8.78171e-05	0.000246617
C16orf91	0.490316	9.48961e-11	8.45977e-10
C16orf95	0.526056	9.83361e-05	0.000273127
C17orf100	0.226108	0.00055149	0.00131323
C17orf113	0.32979	0.00883064	0.0161521
C17orf49	0.374158	0.00135993	0.0029784
C17orf58	0.322267	4.08446e-06	1.49105e-05
C17orf67	0.349421	2.56102e-07	1.17355e-06
C17orf75	0.329635	1.66545e-10	1.41939e-09
C17orf97	0.460853	0.0195054	0.0328934
C17orf99	0.573369	0.0231853	0.0384056
C18orf21	0.510422	3.35461e-11	3.25503e-10
C18orf25	-0.132369	0.00737313	0.0137018
C19orf18	1.08658	1.35663e-09	9.70167e-09
C19orf25	0.53686	1.06168e-10	9.40053e-10
C19orf44	0.284997	7.18087e-06	2.49155e-05
C19orf53	0.618206	3.95638e-23	3.92884e-21
C19orf54	0.122016	0.0307916	0.0494697
C19orf73	0.619531	1.44026e-08	8.37882e-08
C1D	0.357923	1.45993e-10	1.25859e-09
C1GALT1	-0.106756	0.0006823	0.00159305
C1GALT1C1	0.162742	0.00325882	0.00654518
C1GALT1C1L	0.924122	0.00010621	0.000292666
C1orf116	-0.247155	0.00426332	0.00835413
C1orf122	0.633203	1.79724e-07	8.46809e-07
C1orf127	-0.427877	0.0173654	0.0296736
C1orf131	0.198719	1.39299e-05	4.55713e-05
C1orf159	0.359402	1.62961e-05	5.25563e-05
C1orf174	0.149414	0.000119164	0.000325445
C1orf198	-0.156587	5.88119e-05	0.000170313
C1orf216	0.177299	0.00868532	0.0159197
C1orf35	0.580768	4.21353e-17	1.36029e-15
C1orf43	0.23532	7.98388e-08	4.02012e-07
C1orf50	-0.235176	1.5426e-06	6.11508e-06
C1orf52	0.304841	1.28072e-13	2.02361e-12
C1orf53	0.582994	5.25659e-11	4.93868e-10
C1orf54	0.376591	0.00597291	0.0113292
C1orf56	0.364553	0.000106684	0.000293817
C1orf68	-0.954874	0.000184489	0.00048535
C1QB	-0.295006	0.00113067	0.00252386
C1QBP	0.382605	3.4008e-07	1.52671e-06
C1QC	-0.510584	1.14225e-05	3.80024e-05
C1QL1	0.488491	0.0288966	0.0466592
C1QL3	-0.40454	0.000327649	0.00081834
C1QL4	1.19589	0.00141538	0.00308607
C1QTNF12	0.963265	2.59128e-05	8.03502e-05
C1QTNF2	-0.0728148	6.02393e-05	0.000174126
C1QTNF7	-0.762591	6.60995e-06	2.30467e-05
C1R	-0.0665372	0.0260734	0.0425296
C1RL	-0.101418	0.00117137	0.00260287
C1S	-0.443942	2.89851e-07	1.31591e-06
C20orf194	-0.153876	0.000504612	0.00121246
C20orf204	1.11745	3.1294e-08	1.71619e-07
C20orf27	0.733391	3.75988e-14	6.57665e-13
C20orf96	0.645549	1.19279e-05	3.9458e-05
C21orf58	0.404596	4.45776e-06	1.61343e-05
C21orf91	-0.16726	0.0294075	0.047406
C22orf23	-0.162416	0.00844786	0.0155207
C22orf39	0.351464	3.35914e-09	2.22665e-08
C2CD2	-0.164101	0.02203	0.0366817
C2CD3	-0.264223	1.2527e-06	5.04099e-06
C2CD4C	0.46626	0.00417964	0.00820655
C2CD4D	0.513051	0.000380742	0.000937956
C2orf15	0.565185	3.20616e-05	9.77358e-05
C2orf49	0.151861	0.000167469	0.000444825
C2orf50	0.495586	1.21313e-05	4.00956e-05
C2orf66	0.572573	0.0008982	0.0020451
C2orf68	0.292612	2.10374e-10	1.75293e-09
C2orf69	-0.0967205	0.000920914	0.00209044
C2orf72	0.58911	0.0195652	0.0329694
C2orf76	0.499847	1.67673e-13	2.59703e-12
C2orf81	0.645261	5.72635e-05	0.000166105
C2orf92	0.0704708	0.011046	0.0197822
C3	-0.291148	0.00394531	0.00778053
C3AR1	-0.588353	1.7138e-07	8.11393e-07
C3orf33	0.827847	1.90867e-09	1.33098e-08
C3orf38	-0.0797632	0.00340045	0.00679051
C3orf62	0.291323	0.018109	0.0307901
C3orf70	-0.399718	0.00737313	0.0137018
C4A	-0.963576	1.20499e-08	7.12104e-08
C4B	-0.920896	2.33904e-07	1.08067e-06
C4orf47	0.496677	0.000957802	0.00216884
C4orf48	1.22849	9.94271e-12	1.06558e-10
C4orf50	-0.370143	0.00220456	0.00460581
C4orf54	-1.66674	1.05459e-05	3.53709e-05
C5AR1	-0.451424	0.000272835	0.000693468
C5orf24	-0.109439	0.00116879	0.00259787
C5orf34	0.435072	1.69477e-06	6.6544e-06
C5orf38	1.02345	1.16784e-08	6.9302e-08
C5orf51	-0.13455	0.000311855	0.00078238
C5orf63	0.339865	6.95147e-06	2.41676e-05
C6orf120	-0.207172	4.5332e-07	1.98676e-06
C6orf132	-0.45459	2.56122e-06	9.73253e-06
C6orf136	0.348966	1.86063e-10	1.56532e-09
C6orf163	0.51725	6.51287e-09	4.11546e-08
C6orf226	0.356692	0.000941828	0.00213545
C6orf52	0.886437	2.56912e-06	9.7578e-06
C6orf62	-0.156017	0.000207607	0.00054082
C6orf89	-0.171577	5.0046e-09	3.22076e-08
C7	-0.164163	0.00710935	0.0132666
C7orf25	0.284072	1.57493e-05	5.09708e-05
C7orf26	0.329487	1.17853e-11	1.24436e-10
C7orf50	0.731309	1.3443e-10	1.16789e-09
C7orf61	0.867708	1.908e-06	7.40821e-06
C8G	1.33233	7.31713e-08	3.7166e-07
C8orf33	0.29656	5.13862e-09	3.29889e-08
C8orf37	-0.181663	0.00788677	0.0145683
C8orf58	0.461661	3.43469e-08	1.86342e-07
C8orf76	0.805868	1.10469e-15	2.66245e-14
C8orf82	0.485282	1.29523e-10	1.12901e-09
C9orf116	0.764729	1.0073e-08	6.07169e-08
C9orf16	0.732018	8.76728e-13	1.17071e-11
C9orf24	0.513027	1.33301e-08	7.8128e-08
C9orf40	0.305612	2.83964e-05	8.7498e-05
C9orf43	0.368108	3.06949e-06	1.15078e-05
C9orf78	0.344952	1.39711e-14	2.66674e-13
C9orf85	0.166906	0.00206238	0.00433298
CA12	-0.291646	0.000648627	0.00152281
CA14	0.462388	0.000433963	0.00105777
CA2	-0.335496	0.000440172	0.00107091
CA5B	-0.157288	0.00161395	0.0034808
CAB39	-0.28424	1.96255e-06	7.5993e-06
CABIN1	-0.0829587	0.00337305	0.00674352
CABP4	-0.348982	0.00603042	0.0114314
CABYR	0.437012	6.63028e-06	2.31073e-05
CACHD1	-0.0923702	0.000717593	0.00166677
CACNA1A	0.348357	0.0127398	0.0225098
CACNA1B	0.548316	0.0069808	0.0130531
CACNA1C	-0.50327	5.42993e-08	2.83324e-07
CACNA1F	0.469945	0.0274979	0.0445934
CACNA1G	-0.0298792	4.31493e-07	1.90065e-06
CACNA1H	0.0169685	0.010147	0.0183313
CACNA1S	-1.69671	0.0058142	0.0110468
CACNA2D1	-0.131846	0.00572567	0.0109011
CACNB3	0.198821	0.00331885	0.00664532
CACNG6	-1.06765	0.0063976	0.0120515
CACTIN	0.126018	0.000620796	0.00146317
CACUL1	-0.124455	0.003598	0.00715133
CACYBP	0.404182	3.13653e-17	1.05606e-15
CADM3	-0.554349	0.00218302	0.00456627
CADM4	0.324046	0.00190695	0.00403889
CADPS	0.269167	0.0304755	0.0490069
CAGE1	0.301196	0.0310604	0.0498606
CALB1	0.809082	0.0306457	0.0492557
CALCOCO1	-0.348165	2.30656e-09	1.57759e-08
CALCOCO2	-0.157018	0.000206579	0.000538231
CALCRL	-0.400374	1.63116e-08	9.41955e-08
CALD1	-0.313565	1.92044e-05	6.09829e-05
CALHM5	-0.61931	1.67953e-08	9.6704e-08
CALHM6	-0.587277	3.23267e-06	1.20602e-05
CALM1	-0.223052	3.74123e-06	1.37761e-05
CALM2	0.387478	1.45229e-16	4.19639e-15
CALML6	0.551321	3.18665e-06	1.19101e-05
CALU	-0.136414	0.000818929	0.00188016
CAMK1	-0.162333	0.00293096	0.00593761
CAMK1D	-0.0862298	0.00268844	0.00550243
CAMK2A	-0.917773	3.17981e-05	9.6989e-05
CAMK2D	-0.257051	1.37318e-05	4.49796e-05
CAMK2N2	0.441298	0.000133351	0.000359992
CAMK4	-0.224267	0.0013132	0.00288411
CAMKMT	0.449795	4.45463e-13	6.30805e-12
CAMLG	0.332978	2.40539e-14	4.41409e-13
CAMSAP1	-0.23164	7.30903e-06	2.53098e-05
CAMSAP2	-0.222658	2.29899e-06	8.82799e-06
CAMTA1	0.397665	8.07336e-13	1.0873e-11
CAMTA2	-0.332036	6.78451e-16	1.71692e-14
CAND1	-0.170015	7.56361e-05	0.000215026
CAND2	-0.810472	0.000213349	0.000554672
CANX	-0.16438	0.000186526	0.000490134
CAP1	-0.178675	0.000401253	0.000983635
CAP2	-0.740439	1.16354e-08	6.9099e-08
CAPN1	-0.126898	0.00931379	0.0169548
CAPN10	0.434998	6.20478e-10	4.7443e-09
CAPN11	0.229812	0.0016455	0.00354253
CAPN2	-0.160505	9.34815e-05	0.000260798
CAPN3	-0.438578	0.0141571	0.0246997
CAPN5	-0.359608	0.000305131	0.000767598
CAPN6	0.555388	2.34234e-05	7.31368e-05
CAPN7	-0.119815	0.000475827	0.00114946
CAPN8	0.720318	0.00278481	0.00567966
CAPRIN1	-0.210659	1.45405e-05	4.73911e-05
CAPRIN2	0.248933	0.00452358	0.008808
CAPS	1.07743	4.45438e-08	2.35794e-07
CAPS2	-0.291851	9.20339e-05	0.000257262
CAPZA1	-0.114245	0.00641048	0.0120701
CAPZA2	-0.0467078	0.0161786	0.0278306
CARD11	-0.137648	0.00433994	0.00848624
CARD14	-0.224512	0.0292208	0.0471148
CARD17	0.00561589	0.0190027	0.0321492
CARD19	0.272292	0.000154883	0.000414554
CARD6	-0.647314	1.1382e-11	1.2042e-10
CARD8	-0.177831	0.000345937	0.000859502
CARM1	-0.122261	0.00116364	0.00258788
CARMIL1	-0.289606	7.09877e-09	4.4251e-08
CARNMT1	-0.12112	0.0276306	0.0447902
CARS1	0.254052	4.60699e-05	0.000136359
CARS2	0.403495	3.39773e-11	3.29483e-10
CASD1	-0.104646	0.00286558	0.00582095
CASK	-0.158206	0.000511758	0.00122831
CASKIN2	-0.221723	8.61863e-09	5.26993e-08
CASP10	-0.422614	1.38837e-08	8.107e-08
CASP14	-0.041553	0.000265596	0.000676617
CASP2	-0.121477	0.00964299	0.0174972
CASP5	-0.606348	3.19377e-06	1.19284e-05
CASP6	0.186562	0.00017876	0.000471148
CASP7	-0.225205	1.1065e-05	3.69146e-05
CASP8	-0.102505	0.00647177	0.0121724
CASP8AP2	-0.258596	5.8359e-06	2.05626e-05
CASQ1	-1.675	0.000696534	0.00162219
CASQ2	-1.10825	0.000745991	0.00172615
CASS4	-1.09573	2.12269e-18	8.95295e-17
CAST	-0.147981	0.000310349	0.000779349
CASZ1	-0.482853	4.02318e-14	6.96729e-13
CAT	-0.394497	1.16795e-09	8.44476e-09
CATSPER2	0.325187	0.00123226	0.00272428
CATSPER3	1.31014	9.61691e-09	5.8326e-08
CATSPERB	-0.343033	0.00304088	0.00613809
CATSPERE	0.309721	0.00022445	0.000580646
CATSPERG	0.413946	0.000599614	0.00141771
CAV3	-0.885537	0.0130328	0.02295
CAVIN2	0.555754	0.002694	0.00551093
CAVIN4	-1.29448	0.0237241	0.0391781
CBL	-0.350559	2.69754e-10	2.21246e-09
CBLB	-0.211501	1.15219e-05	3.82926e-05
CBLC	0.502073	0.000281621	0.000714181
CBR1	0.379148	4.32912e-05	0.000128741
CBR3	0.524491	0.0114701	0.0204762
CBS	0.516339	0.00186373	0.00395696
CBWD1	0.227975	0.000663737	0.00155503
CBWD2	0.190429	4.98167e-06	1.78046e-05
CBWD3	0.455014	2.41687e-10	1.99372e-09
CBWD5	0.325421	7.66157e-06	2.64256e-05
CBWD6	0.547409	1.06433e-13	1.70751e-12
CBX1	0.147657	0.0179865	0.0306117
CBX3	0.426751	2.09371e-19	1.08776e-17
CBX5	-0.253402	0.000100787	0.000279093
CBX8	0.553597	2.71418e-15	6.01491e-14
CBY1	0.503977	2.78047e-11	2.73343e-10
CC2D1B	-0.105523	0.00495066	0.00956245
CCAR2	0.261553	0.000167048	0.000443783
CCDC106	0.621313	4.80921e-07	2.09718e-06
CCDC107	0.51142	0.0176835	0.030158
CCDC112	0.19471	0.0143312	0.0249674
CCDC114	0.450865	2.03171e-05	6.42048e-05
CCDC115	0.121772	0.0104644	0.0188395
CCDC116	0.233856	0.0166002	0.0284786
CCDC12	0.698691	1.25145e-12	1.61607e-11
CCDC120	-0.408624	2.57715e-08	1.43694e-07
CCDC124	0.587778	6.08187e-12	6.84537e-11
CCDC127	0.302127	8.99331e-07	3.71623e-06
CCDC130	0.407041	9.29412e-11	8.29964e-10
CCDC134	-0.181614	0.00106968	0.00239933
CCDC137	0.434019	3.19852e-10	2.59756e-09
CCDC138	0.289998	2.10731e-05	6.63531e-05
CCDC141	-0.992723	7.91144e-11	7.16689e-10
CCDC144A	-0.40411	0.0112963	0.0202029
CCDC146	0.272501	0.00676056	0.0126655
CCDC148	0.33902	0.00232948	0.00484302
CCDC150	0.676317	3.22415e-12	3.80925e-11
CCDC151	0.0841863	7.36919e-09	4.58093e-08
CCDC153	0.626894	4.12282e-05	0.000123096
CCDC154	1.45402	3.11194e-09	2.07952e-08
CCDC157	0.57293	2.61458e-08	1.45574e-07
CCDC159	0.437973	0.000106684	0.000293817
CCDC167	0.793171	1.22332e-12	1.58365e-11
CCDC169	0.943991	0.000163368	0.000435261
CCDC17	0.140418	0.000314887	0.000789357
CCDC170	-0.765702	1.15249e-07	5.64906e-07
CCDC171	-0.268015	0.000298543	0.000752352
CCDC174	0.186429	0.00112817	0.00251971
CCDC183	0.676643	1.38944e-10	1.20377e-09
CCDC186	-0.423321	2.06259e-13	3.16035e-12
CCDC187	0.998872	1.52091e-05	4.93241e-05
CCDC189	0.580781	0.000107091	0.000294731
CCDC192	0.307576	0.00166864	0.0035889
CCDC24	0.530325	8.19284e-10	6.10089e-09
CCDC25	0.18051	0.00921193	0.016785
CCDC28A	0.265154	2.33119e-07	1.07768e-06
CCDC28B	1.03722	1.01426e-10	8.99589e-10
CCDC3	-0.00676133	0.0184185	0.0312857
CCDC34	0.617208	4.30458e-14	7.40558e-13
CCDC43	0.164309	2.93747e-07	1.33205e-06
CCDC50	-0.102292	0.0289427	0.0467241
CCDC51	0.309223	5.99241e-08	3.09279e-07
CCDC57	0.560937	6.7807e-13	9.25928e-12
CCDC58	0.568818	7.03213e-19	3.35362e-17
CCDC59	0.450129	2.13017e-21	1.60684e-19
CCDC6	-0.114545	0.0102953	0.0185628
CCDC61	0.54054	4.51802e-08	2.39001e-07
CCDC66	0.157801	0.0136459	0.0239143
CCDC69	-0.561115	1.16784e-08	6.9302e-08
CCDC7	0.204935	0.0109866	0.019687
CCDC71L	-0.167708	0.0176234	0.0300719
CCDC74A	0.773985	1.95037e-06	7.55773e-06
CCDC74B	0.598675	0.00071595	0.00166369
CCDC77	0.430159	4.0648e-12	4.73121e-11
CCDC78	0.842774	2.68176e-13	4.01114e-12
CCDC80	-0.506144	1.05639e-05	3.54086e-05
CCDC85A	-0.420989	8.16724e-09	5.01542e-08
CCDC85B	0.821141	3.93892e-06	1.44094e-05
CCDC85C	-0.341895	4.23049e-07	1.86713e-06
CCDC86	0.106845	0.0118661	0.0211232
CCDC88A	-0.154365	0.00471423	0.00914631
CCDC88B	0.61933	0.00899465	0.0164253
CCDC88C	-0.211657	0.00108163	0.00242509
CCDC9	0.163864	0.0054771	0.0104774
CCDC90B	0.191952	0.000862672	0.00196935
CCDC92	-0.274441	0.00174734	0.00373818
CCDC97	-0.099718	0.00108403	0.00243013
CCHCR1	0.502565	1.82192e-09	1.27616e-08
CCKAR	-1.27799	1.04049e-08	6.24054e-08
CCL11	-0.543515	0.0193259	0.0326186
CCL13	-0.212231	0.00501875	0.00968445
CCL18	-0.507916	0.00031565	0.000791015
CCL2	-0.182221	0.0140339	0.0245065
CCL22	-0.498717	2.12852e-07	9.89523e-07
CCL24	-0.396838	0.00148998	0.00323344
CCL26	0.206299	0.00186684	0.00396302
CCL4	-0.187729	0.00876579	0.0160503
CCL5	-0.0665406	0.00507779	0.00978514
CCL8	-0.249324	0.00181972	0.00387242
CCN2	-0.142995	0.0102581	0.0185062
CCN4	-0.230538	0.000206067	0.000537075
CCN5	-0.673202	0.00621784	0.0117483
CCNB1	0.357553	4.64947e-06	1.67317e-05
CCNB1IP1	0.660197	5.26221e-22	4.30021e-20
CCNB2	0.448719	2.56907e-10	2.11262e-09
CCNC	0.147384	0.00730422	0.0135786
CCND1	-0.275146	0.000525105	0.0012565
CCNE1	0.5533	0.000128673	0.000348623
CCNE2	-0.386337	2.94078e-06	1.10782e-05
CCNG2	-0.18871	0.00157274	0.00339893
CCNH	0.312395	1.3383e-08	7.82919e-08
CCNI2	0.498136	0.000449104	0.00109044
CCNJL	-0.302471	0.000929228	0.0021084
CCNK	-0.457468	5.64223e-12	6.3872e-11
CCNL1	0.161355	0.00112568	0.00251486
CCNL2	0.338327	1.12458e-06	4.56997e-06
CCNO	0.664885	8.00056e-10	5.98611e-09
CCNP	0.63549	0.012944	0.0228168
CCNQ	0.569781	1.30413e-14	2.51683e-13
CCNYL1	-0.291115	6.56189e-09	4.14477e-08
CCP110	-0.194009	0.000260454	0.000664583
CCPG1	-0.0659881	0.00340045	0.00679051
CCR1	-0.888764	6.64218e-12	7.39644e-11
CCR10	1.11868	0.000669871	0.00156566
CCR2	-1.07738	1.70366e-11	1.75052e-10
CCR3	-0.597262	9.55296e-07	3.93298e-06
CCR4	-1.09037	3.46287e-14	6.11163e-13
CCR5	-0.717968	1.87931e-09	1.31284e-08
CCR7	-0.236028	2.07793e-05	6.5533e-05
CCR8	-1.1495	1.63331e-19	8.77623e-18
CCRL2	-0.331818	0.000112327	0.00030806
CCS	0.713995	1.61751e-07	7.69285e-07
CCSER2	-0.346479	1.77348e-16	5.05926e-15
CCT2	-0.0592498	3.80639e-07	1.69473e-06
CCT3	0.33047	4.21192e-12	4.89156e-11
CCT4	0.479702	3.30575e-21	2.44657e-19
CCT5	0.216337	0.00343498	0.00685424
CCT6A	0.201687	5.2003e-05	0.000152112
CCT6B	0.37587	0.000461471	0.00111788
CCT7	0.48557	1.78608e-23	1.93266e-21
CCT8	0.247592	1.03564e-07	5.11302e-07
CCZ1	0.276779	1.78443e-05	5.70567e-05
CD101	-0.245727	3.41521e-05	0.000103565
CD109	-0.153973	0.00037712	0.0009302
CD14	-0.198709	0.00121343	0.00268642
CD160	-0.400792	9.42031e-05	0.000262717
CD163	-0.746502	1.18698e-06	4.79991e-06
CD163L1	-0.610522	4.49819e-06	1.62581e-05
CD164	-0.126426	0.000328087	0.000819173
CD177	0.190091	0.0155766	0.0269012
CD180	-0.521184	3.54694e-08	1.92034e-07
CD1A	-0.292166	0.000898406	0.00204527
CD1B	-0.589756	2.32994e-07	1.07742e-06
CD1C	-0.301895	4.95932e-06	1.77288e-05
CD1E	-0.490999	4.49135e-06	1.62446e-05
CD2	-0.32075	1.96423e-05	6.22855e-05
CD200	0.0849768	0.0106552	0.01915
CD200R1	-0.604353	6.26729e-06	2.19299e-05
CD207	-0.458543	0.00553564	0.0105726
CD209	-0.658806	1.65651e-07	7.86165e-07
CD22	0.373929	0.00135105	0.00295978
CD226	-0.754421	1.07975e-09	7.83228e-09
CD24	0.0782213	0.00285971	0.00581202
CD244	-0.515918	1.74909e-07	8.26854e-07
CD247	-0.262132	0.000331267	0.000826324
CD27	-0.589631	1.78048e-08	1.01955e-07
CD274	-0.463465	5.60526e-05	0.000162924
CD28	-0.722018	6.88108e-10	5.21314e-09
CD2AP	-0.193663	9.46627e-07	3.90139e-06
CD2BP2	0.344787	1.54975e-08	8.96923e-08
CD300C	-0.317029	0.000236673	0.000608654
CD300LB	-0.238182	0.0237241	0.0391781
CD300LF	-0.274496	0.00252136	0.00519912
CD302	-0.581816	7.91093e-09	4.87711e-08
CD320	0.824142	6.32803e-12	7.0818e-11
CD33	-0.191029	5.60526e-05	0.000162924
CD34	-0.305788	0.00022142	0.000573563
CD36	-0.955961	2.40806e-06	9.19951e-06
CD37	-0.183499	1.48765e-05	4.83457e-05
CD38	-0.19498	0.00909436	0.0165958
CD3D	0.187502	0.031134	0.0499532
CD3E	-0.424266	5.30561e-07	2.29768e-06
CD3G	-0.681894	1.18084e-08	6.99409e-08
CD4	-0.656697	2.69027e-09	1.8202e-08
CD40LG	-0.5144	1.46623e-08	8.5236e-08
CD44	-0.274858	0.000860726	0.00196605
CD47	-0.120196	0.0197029	0.0331623
CD48	-0.288209	1.18252e-05	3.91428e-05
CD5	-0.65776	1.32362e-08	7.7607e-08
CD53	-0.499553	3.43469e-08	1.86342e-07
CD58	0.283529	6.45493e-05	0.000185729
CD6	-0.260532	0.00151602	0.00328313
CD63	0.392781	1.49403e-08	8.67555e-08
CD69	-0.215354	3.49231e-07	1.56466e-06
CD7	0.0422986	0.0145324	0.0252591
CD74	-0.349013	1.11614e-05	3.71731e-05
CD79A	-0.232893	0.000786141	0.00181124
CD80	-0.575447	5.49826e-06	1.94779e-05
CD81	0.259623	0.00796059	0.0146926
CD82	-0.150315	0.0310849	0.0498897
CD84	-0.952491	4.16609e-11	3.98816e-10
CD86	-0.322511	8.69052e-05	0.000244406
CD8A	-0.617255	2.54391e-07	1.1681e-06
CD8B	-0.12869	0.00072253	0.00167749
CD9	0.371367	0.00233928	0.00486136
CD93	-0.637861	4.39849e-10	3.48019e-09
CD96	-0.561797	2.30611e-06	8.85317e-06
CDA	-0.341189	0.00557319	0.0106366
CDADC1	0.3019	1.81487e-09	1.27179e-08
CDC123	0.333325	2.04438e-10	1.70528e-09
CDC14B	-0.185293	0.00374544	0.00741713
CDC16	0.155465	0.000221968	0.000574698
CDC20	0.452322	3.15192e-08	1.72553e-07
CDC25A	0.353285	5.18554e-07	2.24692e-06
CDC25C	0.444021	2.4435e-07	1.12496e-06
CDC26	0.46886	4.45246e-14	7.63487e-13
CDC27	-0.135381	0.000165376	0.000439862
CDC34	0.57474	1.10208e-10	9.73082e-10
CDC37	0.397057	6.20478e-10	4.7443e-09
CDC40	-0.239475	1.27582e-08	7.51695e-08
CDC42BPA	-0.193109	0.00187081	0.00396931
CDC42BPB	-0.558879	8.7447e-17	2.64363e-15
CDC42BPG	-0.134868	0.0309869	0.0497528
CDC42EP3	-0.0739237	0.0213116	0.0356176
CDC42EP5	0.74178	1.7297e-05	5.55443e-05
CDC42SE1	-0.229339	2.05786e-07	9.5952e-07
CDC42SE2	-0.195319	0.000104503	0.000288519
CDC45	0.561296	6.26797e-15	1.2822e-13
CDC5L	-0.0559098	0.0152567	0.0263747
CDC6	0.311816	1.04118e-05	3.49735e-05
CDC7	0.179889	0.00333908	0.00668498
CDC73	-0.145136	3.57798e-05	0.000108104
CDCA3	0.577979	1.8857e-15	4.31921e-14
CDCA5	0.476996	4.04677e-12	4.71722e-11
CDCA7	0.377938	9.00161e-06	3.05572e-05
CDCP1	-0.222957	0.00133055	0.00291935
CDH1	-0.229423	0.000559252	0.0013297
CDH11	-0.332359	0.000249825	0.000639751
CDH13	-0.540832	1.74195e-08	9.99315e-08
CDH17	-0.406027	0.000950285	0.00215275
CDH19	-0.289524	0.00291128	0.00590537
CDH20	-0.462253	0.00361127	0.0071759
CDH22	-0.539191	0.00381971	0.00755372
CDH23	-0.121528	0.013936	0.0243736
CDH24	0.265068	7.64359e-05	0.000217025
CDH3	-0.345696	4.69486e-05	0.000138724
CDH4	0.568888	0.0280772	0.0454202
CDH5	-0.620335	2.58543e-11	2.56095e-10
CDH6	-0.0520578	2.74761e-07	1.25211e-06
CDHR1	-0.138908	0.0130357	0.02295
CDHR3	0.303835	2.31251e-08	1.30234e-07
CDIPT	0.218951	0.000270183	0.000687731
CDK1	0.43079	3.27054e-09	2.1762e-08
CDK10	0.500148	2.1025e-09	1.45259e-08
CDK11A	0.560582	2.33774e-08	1.31561e-07
CDK12	-0.295324	2.0418e-11	2.0695e-10
CDK13	-0.233347	2.92573e-10	2.38963e-09
CDK14	-0.0625119	0.000537519	0.00128347
CDK15	-0.348964	7.11747e-06	2.47064e-05
CDK17	-0.198543	3.3028e-06	1.22944e-05
CDK19	-0.224365	1.1065e-05	3.69146e-05
CDK2	0.177422	0.000247992	0.000635679
CDK2AP2	0.239946	0.00442652	0.00864155
CDK4	0.292669	1.81541e-10	1.53221e-09
CDK5	0.368459	1.30118e-06	5.22136e-06
CDK5R1	-0.198571	0.00294902	0.00597035
CDK5RAP1	0.337188	1.46019e-07	7.00197e-07
CDK5RAP3	0.401157	0.000142105	0.000381852
CDK7	0.219525	0.000176534	0.000465987
CDK9	0.173879	0.00906102	0.0165388
CDKL2	0.648159	0.00297898	0.00602632
CDKL3	0.415591	6.48927e-05	0.000186546
CDKL5	-0.423027	1.80798e-10	1.52676e-09
CDKN1A	-0.170519	0.00272754	0.00557301
CDKN2AIP	-0.130223	0.0143562	0.0250026
CDKN2AIPNL	0.601037	2.39232e-15	5.39303e-14
CDKN2B	-0.517041	0.00367842	0.00729824
CDKN2D	0.427905	9.99868e-09	6.04079e-08
CDKN3	0.464796	6.26729e-06	2.19299e-05
CDO1	0.00180711	0.0197019	0.0331623
CDON	-0.328117	1.60686e-06	6.33616e-06
CDPF1	0.573719	2.95826e-13	4.36643e-12
CDS1	-0.220091	0.00175484	0.00375165
CDT1	0.453411	1.3405e-07	6.48948e-07
CDV3	-0.110161	0.000706183	0.00164294
CDYL	-0.134027	0.000669872	0.00156566
CDYL2	-0.36093	1.891e-07	8.88317e-07
CEACAM1	-0.321762	0.023841	0.0393338
CEACAM19	-0.423983	0.000168313	0.00044669
CEACAM21	-0.285012	9.89755e-05	0.00027466
CEACAM6	-0.506814	0.000183749	0.000483567
CEBPD	0.396305	0.000338528	0.000842961
CEBPZOS	0.469438	1.9594e-16	5.54927e-15
CECR2	-0.204244	0.0233765	0.0386815
CEL	0.221476	2.64217e-05	8.17989e-05
CELF2	-0.568162	4.55347e-11	4.31947e-10
CELF5	1.16265	5.1083e-05	0.0001497
CELSR1	-0.378607	8.89266e-08	4.43221e-07
CELSR2	-0.50669	1.59672e-11	1.64819e-10
CEMIP	-0.628364	8.95461e-08	4.46166e-07
CEMIP2	-0.417861	4.45181e-10	3.51353e-09
CENATAC	0.387963	4.26907e-09	2.76899e-08
CENPA	0.553311	1.93005e-17	6.71453e-16
CENPB	0.279292	0.00437439	0.00854721
CENPH	0.584613	4.64994e-14	7.95611e-13
CENPJ	0.229702	0.00082826	0.00189936
CENPK	0.355381	4.01228e-05	0.000120185
CENPM	0.75946	1.10401e-11	1.17198e-10
CENPO	0.235348	1.45312e-06	5.78227e-06
CENPS	0.897716	2.79624e-16	7.71055e-15
CENPT	0.308689	2.42297e-06	9.25198e-06
CENPU	0.221766	0.00335263	0.00670697
CENPV	0.737298	1.21011e-05	4.00055e-05
CENPW	0.634165	4.00988e-10	3.20668e-09
CENPX	0.777538	1.62655e-19	8.76993e-18
CEP104	-0.258161	6.90657e-13	9.39845e-12
CEP112	-0.11679	0.000610826	0.00144183
CEP128	-0.212879	0.000211769	0.000550746
CEP131	0.549004	3.73427e-13	5.39012e-12
CEP135	-0.077216	0.0202044	0.0339263
CEP170	-0.249109	1.23475e-05	4.07087e-05
CEP170B	-0.291779	2.684e-07	1.22525e-06
CEP19	-0.249061	0.00574776	0.0109378
CEP20	0.144491	0.0189551	0.0320757
CEP295	-0.268465	9.59755e-08	4.76536e-07
CEP350	-0.297907	1.57613e-11	1.62909e-10
CEP43	0.272003	9.97479e-05	0.000276607
CEP55	0.285712	0.00225755	0.00470524
CEP57	0.227657	1.55266e-05	5.03021e-05
CEP63	0.118506	0.00507779	0.00978514
CEP70	0.182321	0.000712682	0.00165659
CEP72	0.372326	1.12968e-08	6.72921e-08
CEP78	0.0911303	0.00704758	0.0131623
CEP83	0.279463	5.79432e-07	2.49761e-06
CEP85L	-0.259093	4.55265e-06	1.64285e-05
CEP89	0.253241	1.80985e-05	5.78106e-05
CEP95	0.391132	1.16443e-14	2.27805e-13
CEP97	-0.278027	1.01433e-05	3.41154e-05
CEPT1	-0.157373	0.00102082	0.00230091
CERK	0.146514	0.00983828	0.0178248
CERS1	1.09404	2.92993e-05	8.99795e-05
CERS2	-0.169733	0.00543488	0.010403
CERS3	-0.292458	0.0100919	0.018238
CERS5	0.369265	1.36885e-15	3.23941e-14
CERS6	-0.0794287	0.00644719	0.0121349
CERT1	-0.286305	1.19575e-09	8.62989e-09
CES2	-0.331659	0.000374424	0.000923987
CES3	0.394765	0.0291743	0.0470495
CES4A	-0.34944	0.001101	0.00246501
CETN2	0.373476	4.10499e-08	2.18998e-07
CETN3	0.394812	8.3046e-11	7.48416e-10
CFAP126	-0.336145	1.31392e-08	7.70672e-08
CFAP157	-0.153132	0.00379073	0.00750019
CFAP161	-0.115454	0.015943	0.0274703
CFAP20	0.173587	3.65152e-06	1.34869e-05
CFAP20DC	0.37936	0.00120014	0.00266001
CFAP251	0.490787	2.17337e-05	6.82821e-05
CFAP298	0.702535	5.74487e-17	1.80998e-15
CFAP36	0.594033	3.08411e-22	2.65877e-20
CFAP410	0.374582	0.00030885	0.000775957
CFAP43	0.0748692	0.000795124	0.00183033
CFAP45	0.335205	4.38814e-05	0.000130373
CFAP52	0.0134208	0.0185122	0.0314211
CFAP53	0.59122	1.78443e-05	5.70567e-05
CFAP54	-0.224515	0.00440038	0.00859373
CFAP74	0.00327669	0.0143559	0.0250026
CFAP97	-0.0690697	0.00379073	0.00750019
CFB	-0.518767	5.46833e-08	2.85044e-07
CFD	0.425065	1.25265e-05	4.12381e-05
CFDP1	0.655099	2.51628e-15	5.64007e-14
CFH	-0.431255	2.72026e-08	1.51083e-07
CFL1	0.204631	0.00857377	0.0157299
CFL2	-0.320084	0.00150295	0.00325842
CFLAR	-0.191517	1.49617e-05	4.86023e-05
CFP	-0.22985	0.0216634	0.0361441
CGB7	0.450463	0.00327539	0.0065734
CGGBP1	-0.0981721	0.000798744	0.00183758
CGNL1	-0.178571	0.000221968	0.000574698
CGREF1	1.06546	3.10197e-05	9.48178e-05
CGRRF1	0.299661	0.00558396	0.0106532
CH25H	-0.552301	6.87856e-05	0.000196907
CHAC2	0.392336	3.44341e-05	0.00010436
CHADL	0.633096	0.00624163	0.0117904
CHAF1A	0.298168	2.78461e-07	1.26713e-06
CHAF1B	0.300697	6.96765e-08	3.55058e-07
CHAMP1	-0.18108	0.000231482	0.000596772
CHCHD1	0.650997	8.93214e-17	2.6951e-15
CHCHD10	0.804061	2.27126e-09	1.55616e-08
CHCHD2	0.625775	4.39795e-17	1.40537e-15
CHCHD3	0.1578	0.000139956	0.000376851
CHCHD4	0.395235	3.05436e-11	2.98214e-10
CHCHD5	0.750025	1.58793e-17	5.62409e-16
CHCHD6	0.774634	4.43103e-14	7.60644e-13
CHCHD7	0.637141	9.68184e-20	5.44473e-18
CHD1	-0.263426	3.82289e-08	2.05274e-07
CHD2	-0.191885	7.68222e-07	3.2237e-06
CHD3	-0.134949	0.0011059	0.0024749
CHD4	0.87519	1.8474e-22	1.66585e-20
CHD5	0.697126	0.00472196	0.00916019
CHD6	-0.290173	1.06465e-07	5.24633e-07
CHD8	-0.352712	3.05651e-13	4.49874e-12
CHD9	-0.397927	3.04776e-15	6.67867e-14
CHEK1	0.207447	0.000104773	0.000289112
CHEK2	0.584614	1.89896e-17	6.63579e-16
CHERP	-0.163076	0.000170869	0.000452938
CHGA	0.396354	0.00371446	0.00736414
CHI3L1	-0.720009	0.000129002	0.000349333
CHI3L2	-0.437466	4.63151e-08	2.44593e-07
CHIC1	-0.190398	0.00102538	0.00230987
CHID1	0.197358	0.00261177	0.00536581
CHKA	0.275279	7.62352e-05	0.000216612
CHKB	0.300764	0.0150711	0.0260941
CHL1	-0.270935	0.0216502	0.036126
CHM	-0.367173	3.40242e-13	4.95214e-12
CHMP1B	-0.0828509	0.0107517	0.0193058
CHMP2A	0.513385	3.05303e-09	2.04622e-08
CHMP2B	-0.100774	0.00782816	0.0144686
CHMP4A	0.32448	2.71652e-05	8.38856e-05
CHMP4B	0.252774	2.5555e-05	7.93034e-05
CHMP6	0.21087	0.0041056	0.0080733
CHN1	-0.183222	0.0148133	0.0256931
CHP1	-0.20948	2.07793e-05	6.5533e-05
CHPF2	-0.215485	7.05486e-06	2.45054e-05
CHRAC1	0.165528	2.52019e-05	7.82851e-05
CHRDL1	-0.960802	6.48253e-05	0.000186386
CHRDL2	-1.06446	0.00657093	0.0123382
CHRM4	-0.131636	0.00766676	0.0141944
CHRNA1	-0.937972	0.0270372	0.0439463
CHRNA10	0.135033	0.00407308	0.00801336
CHRNA5	0.81399	1.59472e-15	3.70685e-14
CHRNA6	-0.373838	2.54908e-07	1.17013e-06
CHRNA9	0.128344	0.00406009	0.00798982
CHRNB1	-0.333928	0.00218762	0.00457346
CHRND	-1.34805	0.0200305	0.0336654
CHRNG	-1.51865	0.00189032	0.00400687
CHST10	0.431443	0.0122961	0.0218143
CHST11	-0.409586	3.0371e-07	1.37405e-06
CHST15	-0.361203	3.3378e-08	1.81525e-07
CHST2	-0.380068	0.00373794	0.00740508
CHST3	-0.336852	3.314e-08	1.80418e-07
CHST8	0.788516	0.023891	0.0394039
CHSY1	-0.268361	3.49947e-06	1.29436e-05
CHSY3	-0.399927	0.000164545	0.000437876
CHTF18	0.5807	4.34491e-12	5.03112e-11
CHTF8	-0.462861	2.82773e-09	1.90672e-08
CHTOP	0.39913	3.75514e-22	3.18477e-20
CIAO1	0.257656	5.74458e-13	7.97632e-12
CIAO2A	0.325843	5.63835e-10	4.34934e-09
CIAO2B	0.539652	3.25143e-14	5.77091e-13
CIAO3	0.546081	1.31392e-08	7.70672e-08
CIAPIN1	0.156714	0.00509761	0.0098161
CIART	0.426112	0.00411377	0.00808733
CIB1	0.653566	2.42451e-11	2.42142e-10
CIBAR1	0.463949	5.56197e-09	3.55758e-08
CIC	-0.287458	1.45376e-12	1.84692e-11
CIITA	-0.549873	2.43531e-07	1.12184e-06
CILK1	-0.0738167	0.00277287	0.00566046
CILP	-1.19787	0.000369971	0.000914005
CINP	0.387838	3.78923e-05	0.00011396
CIPC	-0.281804	6.68102e-08	3.41117e-07
CIR1	0.144556	0.000122885	0.00033427
CIRBP	0.489986	8.62505e-10	6.39541e-09
CISD1	0.46771	2.9022e-08	1.6028e-07
CISD2	0.354171	9.88813e-09	5.9786e-08
CISD3	0.717633	2.17586e-16	6.14015e-15
CITED2	-0.158636	0.00016167	0.000431102
CIZ1	0.0903076	0.00820099	0.0151061
CKAP5	-0.206093	8.44071e-06	2.8834e-05
CKB	0.582187	0.00139597	0.00304841
CKMT1A	0.650021	0.000593391	0.00140469
CKMT1B	0.619844	0.000900431	0.00204928
CKMT2	-1.2809	0.00991016	0.0179364
CKS1B	0.720778	1.43784e-21	1.11682e-19
CKS2	0.699	2.14225e-19	1.10565e-17
CLASP1	-0.19369	7.49818e-08	3.7975e-07
CLASP2	-0.273241	3.42385e-09	2.26572e-08
CLASRP	0.40252	9.65107e-13	1.2757e-11
CLBA1	0.547164	4.62338e-12	5.32214e-11
CLCA2	-0.604134	2.40641e-09	1.64159e-08
CLCA4	-0.757477	0.00129039	0.0028376
CLCN3	-0.485025	2.498e-12	3.03591e-11
CLCN4	-0.385547	1.8211e-06	7.09008e-06
CLCN6	-0.115244	0.00379073	0.00750019
CLCN7	-0.281066	1.75021e-12	2.18986e-11
CLDN11	-0.147789	0.00453249	0.00882427
CLDN15	0.320172	1.16558e-05	3.868e-05
CLDN17	-0.922376	0.0054212	0.0103857
CLDN23	-0.340162	4.01228e-05	0.000120185
CLDN24	-0.426725	0.00257839	0.00530626
CLDN3	1.24321	5.15541e-05	0.000150939
CLDN7	0.583111	5.95869e-06	2.09529e-05
CLDN9	0.985025	0.0263541	0.0429472
CLDND2	1.00172	3.08831e-06	1.15701e-05
CLEC10A	-0.553096	3.09592e-08	1.69961e-07
CLEC12A	-0.0611689	0.0273217	0.0443444
CLEC14A	-0.265688	0.0015525	0.00335843
CLEC16A	-0.23072	1.40374e-08	8.18763e-08
CLEC18B	0.474613	0.0123331	0.0218774
CLEC1A	0.561074	3.14544e-06	1.17617e-05
CLEC2D	-0.0902311	0.022732	0.0377424
CLEC2L	1.12332	0.00385441	0.00761276
CLEC4D	-0.458754	0.000120015	0.000327429
CLEC5A	-0.41417	4.04514e-05	0.000121123
CLEC7A	-0.36499	4.3097e-11	4.1156e-10
CLEC9A	-0.391017	1.49903e-05	4.86851e-05
CLECL1	-0.121218	0.00162079	0.0034939
CLHC1	0.360702	4.18433e-06	1.5229e-05
CLIC1	0.344276	1.7541e-06	6.85646e-06
CLIC2	-0.240084	0.00044964	0.00109158
CLIC4	-0.225729	1.09693e-05	3.66423e-05
CLIC5	-1.0873	2.48583e-08	1.38849e-07
CLIC6	-0.272021	0.00261718	0.00537481
CLINT1	-0.210552	1.48765e-05	4.83457e-05
CLIP1	-0.542592	1.47754e-15	3.46009e-14
CLIP2	-0.208716	0.00695509	0.0130113
CLIP3	-0.0877381	0.00914459	0.0166758
CLIP4	-0.132239	0.00894517	0.0163425
CLK1	0.191133	0.000310349	0.000779349
CLK2	0.26489	6.4642e-09	4.08965e-08
CLK3	0.178279	6.95147e-06	2.41676e-05
CLK4	0.192717	0.00570366	0.0108644
CLMP	-0.481723	0.000102629	0.000283794
CLN5	0.253164	1.56702e-06	6.19933e-06
CLNK	-0.570325	4.97564e-09	3.20475e-08
CLNS1A	0.370866	4.37606e-08	2.32196e-07
CLOCK	-0.413947	1.18662e-15	2.8468e-14
CLP1	0.0921505	0.00755504	0.0140083
CLPP	0.520258	1.69262e-13	2.61905e-12
CLPTM1L	0.375096	3.15991e-10	2.56753e-09
CLPX	-0.182786	0.00452358	0.008808
CLSTN1	-0.366082	1.42588e-09	1.01507e-08
CLSTN2	-0.754395	7.70409e-05	0.000218585
CLTA	0.562831	1.77855e-10	1.50596e-09
CLTC	-0.237426	1.2297e-08	7.25611e-08
CLTRN	0.782663	0.000391805	0.000962188
CLUAP1	0.377412	8.16713e-07	3.40532e-06
CLYBL	0.351899	0.000299996	0.00075577
CMA1	-0.824042	0.000682537	0.00159336
CMBL	0.524478	0.000768456	0.00177414
CMC1	0.417508	6.29934e-11	5.83451e-10
CMC2	0.704642	3.85811e-23	3.85565e-21
CMIP	-0.316794	5.70445e-08	2.95682e-07
CMKLR1	-0.565079	3.98687e-06	1.45814e-05
CMPK2	-0.539134	1.46691e-06	5.83418e-06
CMSS1	0.438438	3.18743e-11	3.10819e-10
CMTM1	-0.720267	4.41828e-16	1.16902e-14
CMTM2	0.231294	0.00416696	0.00818473
CMTM6	-0.165465	0.00029782	0.000751011
CMTR1	-0.154056	0.000230343	0.000594227
CMTR2	-0.241074	3.91942e-08	2.10242e-07
CMYA5	-1.70847	3.29036e-08	1.79443e-07
CNDP2	-0.189358	0.00172135	0.00368962
CNEP1R1	-0.172232	2.36367e-05	7.37588e-05
CNFN	-0.316734	0.0205792	0.0344892
CNGB1	-0.88098	1.2261e-07	5.96326e-07
CNIH2	0.680006	0.0247132	0.0406064
CNIH3	0.347733	0.0023344	0.0048525
CNIH4	0.312001	5.46021e-13	7.61518e-12
CNN2	-0.15559	0.00140512	0.00306625
CNN3	-0.0654328	0.00413836	0.00813466
CNNM4	-0.224259	5.91263e-05	0.000171192
CNOT1	-0.551443	6.77651e-17	2.09298e-15
CNOT10	0.170271	0.000428852	0.00104629
CNOT11	0.10358	0.000725847	0.00168469
CNOT3	-0.0621346	0.0187959	0.0318406
CNOT4	-0.194034	1.09822e-07	5.4016e-07
CNOT6	-0.242416	6.409e-07	2.73328e-06
CNOT6L	-0.262125	3.42243e-08	1.8587e-07
CNP	-0.110077	0.00357634	0.00711279
CNPY2	0.732412	5.73027e-15	1.183e-13
CNPY3	0.495003	9.94127e-10	7.26833e-09
CNPY4	0.270661	0.0150466	0.0260546
CNR1	-0.365877	6.2235e-05	0.000179465
CNR2	0.0934879	9.19613e-07	3.79504e-06
CNST	-0.107616	0.00224341	0.00467761
CNTD1	0.289085	0.000666798	0.0015601
CNTF	-0.329821	1.96423e-05	6.22855e-05
CNTN3	-0.845219	7.2566e-06	2.51449e-05
CNTN4	-0.639138	0.00032531	0.000813145
CNTNAP1	-0.161254	0.000474708	0.00114781
CNTNAP3	-0.251873	0.0279425	0.0452351
CNTROB	0.156384	0.0245927	0.0404337
COA1	0.45298	1.07741e-20	7.10279e-19
COA3	0.565758	2.26294e-12	2.78038e-11
COA4	0.448212	1.96241e-10	1.6439e-09
COA5	0.488989	1.05842e-20	7.0367e-19
COA6	0.694908	5.86873e-17	1.83793e-15
COA8	0.726269	1.20494e-15	2.88634e-14
COASY	0.252346	6.49275e-07	2.76524e-06
COBL	-0.849534	2.52986e-06	9.62968e-06
COBLL1	-0.344985	1.62521e-08	9.38864e-08
COG1	-0.129257	0.000280253	0.000711285
COG2	-0.109723	0.00545596	0.0104421
COG5	-0.126031	0.000648627	0.00152281
COG6	-0.17377	0.000146869	0.000394045
COIL	0.162623	0.00197698	0.00416863
COL10A1	-0.371089	0.0113069	0.020217
COL11A1	-0.560091	0.0117188	0.0208823
COL12A1	-0.618092	3.57237e-08	1.93211e-07
COL14A1	-0.694743	8.8669e-10	6.54998e-09
COL15A1	-0.694963	1.11312e-08	6.64314e-08
COL17A1	-0.27528	0.00976686	0.0177036
COL18A1	-0.373741	1.70008e-06	6.67025e-06
COL19A1	-0.408159	0.000851376	0.00194753
COL1A1	-0.450627	9.54452e-05	0.000265756
COL1A2	-0.499012	7.15654e-05	0.000204119
COL24A1	-0.581357	4.58011e-06	1.65086e-05
COL25A1	-0.61343	0.000947694	0.00214781
COL3A1	-0.750537	2.03172e-05	6.42048e-05
COL4A1	-0.483953	1.77904e-07	8.39745e-07
COL4A2	-0.284198	0.000178313	0.000470048
COL4A3	-0.584852	0.00433967	0.00848624
COL4A4	-0.569395	0.000237256	0.000609954
COL4A5	-0.264431	0.00195614	0.00412969
COL5A1	-0.566746	3.55306e-06	1.31263e-05
COL5A2	-0.551208	5.01161e-06	1.78994e-05
COL5A3	-0.302848	0.00634971	0.0119715
COL6A1	-0.438008	0.001101	0.00246501
COL6A2	-0.26711	0.0232235	0.0384647
COL6A3	-0.720708	2.2846e-07	1.05707e-06
COL6A5	-1.50626	6.19538e-10	4.74173e-09
COL6A6	-1.04349	2.37071e-07	1.09337e-06
COL8A1	-0.701069	9.57011e-06	3.2361e-05
COL8A2	-0.154545	0.00280154	0.00571008
COL9A2	1.0593	0.000557952	0.00132701
COL9A3	1.30873	0.000672959	0.00157218
COLEC11	1.25471	5.61419e-06	1.98617e-05
COLEC12	-0.663451	4.20192e-05	0.000125243
COLGALT1	0.141277	0.00466819	0.00907044
COMMD1	0.602063	3.56455e-13	5.1594e-12
COMMD3	0.902249	3.59793e-15	7.75433e-14
COMMD4	0.705918	2.95068e-14	5.27893e-13
COMMD5	0.327444	1.55271e-07	7.40712e-07
COMMD6	0.931006	5.6492e-28	1.42961e-25
COMMD7	0.609772	4.9809e-10	3.87843e-09
COMP	-0.809445	0.00741476	0.013771
COMTD1	0.85442	1.70219e-07	8.06626e-07
COP1	0.2858	9.81329e-12	1.05459e-10
COPA	-0.324779	2.25766e-14	4.17228e-13
COPB1	-0.137661	0.000380742	0.000937956
COPB2	-0.214649	2.24646e-07	1.04035e-06
COPE	0.61105	1.18762e-14	2.31476e-13
COPG1	-0.256933	1.12137e-08	6.68731e-08
COPRS	0.6316	3.76495e-17	1.23324e-15
COPS3	0.210239	0.0127849	0.0225794
COPS4	0.174269	0.00637396	0.0120086
COPS5	0.193125	7.63906e-06	2.63596e-05
COPS6	0.397627	4.50854e-15	9.52074e-14
COPS7A	0.0901802	0.0295951	0.0476939
COPS7B	0.290182	7.05479e-11	6.47308e-10
COPS8	0.167794	0.000546371	0.00130183
COPS9	1.04281	6.75954e-19	3.23345e-17
COPZ1	0.315027	2.92216e-14	5.23387e-13
COPZ2	0.408692	0.00837001	0.0153957
COQ10A	0.321131	3.61084e-08	1.95157e-07
COQ2	0.232962	0.00010696	0.000294421
COQ3	0.496704	1.57189e-14	2.98223e-13
COQ4	0.509583	4.65278e-10	3.64828e-09
COQ5	0.346393	9.72792e-12	1.04685e-10
COQ6	0.296213	4.7586e-05	0.000140449
COQ7	0.191247	2.99274e-05	9.17469e-05
COQ8B	0.186944	0.00065917	0.00154548
CORIN	-0.438028	0.0128984	0.0227516
CORO1A	0.00964646	0.00541388	0.0103729
CORO2B	-0.419597	5.54563e-05	0.000161311
CORO7	0.557748	0.000140669	0.000378446
COX11	0.160772	0.000454982	0.00110369
COX14	0.817754	2.19755e-17	7.57791e-16
COX15	0.207377	8.73959e-08	4.36701e-07
COX16	0.221971	0.000184209	0.000484696
COX17	0.532233	2.61122e-10	2.14503e-09
COX19	0.517723	3.14168e-19	1.59524e-17
COX4I1	0.808564	1.41513e-22	1.31381e-20
COX5A	0.550274	7.63691e-16	1.91717e-14
COX5B	0.614692	7.236e-21	5.0459e-19
COX6A1	0.773161	5.25807e-26	9.37491e-24
COX6A2	-0.858682	0.0150178	0.0260152
COX6B1	0.811321	2.09371e-19	1.08776e-17
COX6B2	0.742306	0.000826386	0.00189534
COX6C	1.06034	2.11007e-26	4.08728e-24
COX7A2	0.665308	1.78332e-15	4.10871e-14
COX7A2L	0.451891	2.43377e-29	7.20487e-27
COX7B	0.676669	9.21719e-19	4.26601e-17
COX7C	0.633364	4.19876e-18	1.70229e-16
COX8A	0.56067	1.11604e-15	2.68158e-14
CP	0.457752	0.0126948	0.022443
CPA3	-0.831449	9.67058e-09	5.86288e-08
CPA4	-0.359065	7.64359e-05	0.000217025
CPD	-0.238785	2.70704e-06	1.02543e-05
CPE	-0.0347855	0.00325221	0.00653358
CPEB2	-0.722287	1.22332e-12	1.58365e-11
CPEB3	-0.434084	4.97122e-08	2.61039e-07
CPEB4	-0.871487	1.57254e-22	1.44287e-20
CPED1	-0.0299397	7.49818e-08	3.7975e-07
CPLANE1	-0.213695	0.000203523	0.000531239
CPLANE2	-0.11124	0.00354052	0.00704958
CPLX1	0.39099	0.000278211	0.000706675
CPM	-0.454182	1.19732e-10	1.05126e-09
CPNE1	0.326469	2.06906e-06	7.98612e-06
CPNE3	-0.209528	4.23514e-06	1.53961e-05
CPNE5	-0.200751	0.00202354	0.00425879
CPNE7	1.00192	4.84086e-07	2.10805e-06
CPNE8	-0.142589	0.0166007	0.0284786
CPOX	0.204743	1.84602e-05	5.88581e-05
CPPED1	-0.190066	0.000156851	0.000419106
CPQ	-0.204676	0.00471423	0.00914631
CPSF1	0.230224	0.0011975	0.0026549
CPSF2	-0.180565	7.84388e-06	2.69773e-05
CPSF3	0.328876	1.52045e-17	5.44655e-16
CPSF4	0.559277	8.81895e-23	8.38602e-21
CPSF6	0.0840974	0.0010231	0.00230571
CPT1A	0.00917167	0.026541	0.0432158
CPT1C	0.335541	0.00151602	0.00328313
CPVL	-0.481816	4.46774e-09	2.89306e-08
CPXM2	-0.244193	0.000706183	0.00164294
CR1	-0.630573	2.03172e-05	6.42048e-05
CRABP2	-0.369451	0.00390614	0.00770715
CRACD	-0.623137	4.62261e-09	2.98841e-08
CRACR2B	0.664645	2.72372e-06	1.03125e-05
CRADD	0.228555	0.000506984	0.00121779
CRAMP1	0.119444	0.0114701	0.0204762
CRB3	0.445604	0.000127365	0.000345318
CRCP	0.222781	7.49818e-08	3.7975e-07
CRCT1	0.0853451	0.010258	0.0185062
CREB1	-0.204541	1.05307e-08	6.31116e-08
CREB3L2	-0.390911	4.09784e-13	5.86099e-12
CREB3L4	0.510236	1.07944e-07	5.31424e-07
CREBBP	-0.361196	2.61976e-13	3.93341e-12
CREBL2	-0.211573	6.20416e-07	2.65457e-06
CREBRF	-0.264768	2.58499e-06	9.81571e-06
CREBZF	0.15757	0.00160701	0.00346727
CREG2	-0.295583	0.0148133	0.0256931
CRIM1	-0.239084	1.61578e-05	5.21422e-05
CRIP1	0.651714	0.00440908	0.00860964
CRIPT	0.425893	2.40467e-23	2.58419e-21
CRISPLD2	-0.636938	4.30158e-09	2.78776e-08
CRK	-0.124343	0.000155275	0.000415531
CRKL	-0.127611	0.00316741	0.00637546
CRLS1	0.170111	0.000761486	0.00175883
CRNKL1	0.227251	0.00080238	0.0018454
CROCC	0.430062	6.66343e-07	2.82642e-06
CROT	-0.157181	0.00271072	0.00554297
CRTAM	-0.633163	1.18466e-07	5.79046e-07
CRTAP	0.159851	0.0125162	0.0221597
CRTC2	0.205036	1.51091e-07	7.23412e-07
CRTC3	-0.166437	1.43342e-05	4.67964e-05
CRY2	-0.225846	2.98614e-06	1.12195e-05
CRYBB2	1.05797	3.93983e-05	0.000118172
CRYBB3	0.990083	5.64443e-08	2.93059e-07
CRYBG1	-0.639737	3.78177e-16	1.01429e-14
CRYBG2	-0.360372	3.7481e-05	0.000112875
CRYBG3	-0.856011	1.37811e-21	1.08656e-19
CRYGS	0.572182	4.77685e-06	1.71351e-05
CRYZL1	0.273967	7.20577e-09	4.48645e-08
CSAD	0.386068	1.71019e-05	5.49855e-05
CSDE1	-0.125492	0.00234907	0.00487783
CSE1L	0.129082	0.00613521	0.0116104
CSF1	-0.462005	1.79387e-09	1.25819e-08
CSF1R	-0.760926	1.44199e-10	1.24586e-09
CSF2RA	-0.229323	2.34395e-05	7.31725e-05
CSF2RB	-0.413636	8.15114e-14	1.33498e-12
CSF3R	-0.580389	9.65407e-06	3.26168e-05
CSGALNACT1	-0.411982	1.02142e-07	5.04919e-07
CSGALNACT2	-0.252548	1.74941e-05	5.612e-05
CSKMT	0.684698	2.82592e-15	6.22733e-14
CSMD2	-0.679681	1.8788e-06	7.30387e-06
CSNK1A1	-0.49631	1.88433e-14	3.52385e-13
CSNK1E	0.334556	9.81509e-09	5.94131e-08
CSNK1G1	-0.18352	1.17233e-05	3.88546e-05
CSNK1G2	0.186401	0.000845303	0.00193448
CSNK1G3	-0.0860109	0.00379832	0.00751427
CSNK2B	0.830853	9.27757e-15	1.85197e-13
CSPG4	-0.585646	8.81939e-06	3.00035e-05
CSPG5	0.720319	0.00293096	0.00593761
CSRNP1	-0.287561	2.32042e-06	8.90156e-06
CSRNP2	-0.125159	0.000252289	0.000645744
CSRP1	0.179495	0.00180426	0.0038463
CST6	0.0373574	0.0192772	0.0325469
[truncated: 7,781 more rows]

## Sheet: cluster_C_diffSig
cluster_C_diffSig
	log2foldChange	pValues	FDR
A2ML1	-1.27506	4.53377e-06	0.00103118
AACS	-0.228088	0.0029197	0.0410412
AARS1	0.14238	0.0013608	0.0259726
ABCD4	0.128798	0.00258939	0.0379623
ABCG4	-1.10372	0.00304063	0.0420908
ABHD17C	-0.291651	0.00051122	0.0149763
ABHD5	-0.317577	0.000562477	0.0158812
ABI1	-0.204793	0.00381017	0.0480704
ABI2	0.211246	0.000440499	0.0135086
ABLIM1	-0.616671	1.97484e-07	0.000248769
ABTB1	-0.380212	1.33302e-05	0.00182561
AC004706.3	0.624531	3.50309e-07	0.000324802
ACAA2	-0.418845	0.00246585	0.0367098
ACER1	-1.52151	0.00100207	0.0215567
ACOT2	0.272584	0.000752761	0.0183661
ACP1	-0.188053	0.000701259	0.0178828
ACP2	0.212507	0.000560856	0.0158628
ACSS2	-0.279527	6.22967e-05	0.0042295
ACTRT3	0.439143	0.000432807	0.0133368
ADAM15	-0.232662	0.00173204	0.0295766
ADAMDEC1	0.664062	0.000776517	0.0186182
ADAMTSL5	-0.526056	5.67921e-05	0.00397448
ADGRD2	-0.272734	0.00365701	0.0470441
ADGRL1	-0.351083	0.00328804	0.044099
ADORA2B	0.506666	3.27975e-07	0.000324802
ADRA1B	0.208365	0.00307924	0.0422695
AFAP1	0.279609	0.00232955	0.0354542
AGAP3	-0.256889	0.00187021	0.0310614
AGPAT1	0.167121	0.00120082	0.0241284
AGPAT2	-0.404167	0.00211579	0.0332516
AHRR	-0.668424	0.00145174	0.0268326
AIDA	0.197607	0.00160332	0.0281414
AIF1L	-0.686235	0.00230552	0.0352195
AKAP10	0.289221	5.26722e-12	4.3128e-08
AKT1	0.160571	0.00375382	0.0476902
AKT1S1	-0.166771	0.00158627	0.027932
AKTIP	-0.21592	0.000572296	0.0159116
AL136531.2	-0.634391	0.00208328	0.0330259
AL358113.1	-0.600002	0.000693329	0.0177405
AL590560.2	-2.24617	0.0009003	0.0201687
ALDH1B1	0.325712	0.000671949	0.0174942
ALDH3B2	-0.57715	0.00102671	0.0218149
ALKBH5	0.258034	8.08451e-06	0.00137908
ALOX12B	-1.33038	0.00133887	0.0258832
ALOXE3	-0.949986	0.000810034	0.0189502
ALS2CL	-0.511996	0.00024439	0.00939466
ANKFY1	0.284109	3.11317e-06	0.000844364
ANKMY2	0.190643	0.00269779	0.0390274
ANKRD13A	-0.202407	5.56741e-05	0.00397448
ANKRD22	-0.730416	1.02287e-05	0.00158024
ANKRD35	-0.894613	5.24437e-05	0.00383401
ANKRD40	0.193519	0.000861626	0.0197342
ANKRD49	-0.194792	0.0039349	0.0490022
ANO9	-0.39037	0.00362528	0.046783
ANXA1	-0.70938	0.000172563	0.00749573
ANXA11	-0.219395	0.00256292	0.0377432
ANXA2	-0.256849	0.00268402	0.0389659
ANXA9	-0.820785	0.000251179	0.00954363
AOAH	0.378303	0.00349202	0.0456751
AP2B1	0.183758	0.00361626	0.0467402
APEX1	0.193595	0.000485132	0.0144709
APOBEC3D	0.510885	0.00148927	0.0269813
APOBEC3F	0.285461	0.00185057	0.0307977
APOBEC3G	0.396777	0.000113132	0.00595687
APRT	-0.366729	0.00316612	0.0430993
ARF5	-0.262535	0.000237773	0.00918342
ARHGEF10L	-0.366901	0.000611432	0.0164684
ARHGEF25	0.281236	0.00173204	0.0295766
ARHGEF4	-0.38537	0.00060619	0.0164012
ARL2BP	0.253852	0.00196575	0.0319422
ARL4C	0.39886	4.74511e-05	0.00366566
ARMC2	0.17169	0.00229955	0.035161
ARPC1A	-0.550382	0.000125649	0.00629244
ARPC3	-0.27303	0.00100981	0.0215601
ARPC5L	-0.325306	0.0012578	0.0249973
ARRDC1	-0.411596	1.88373e-05	0.0021878
ARRDC4	-0.617714	0.00107602	0.0223332
ARSA	-0.293171	0.000538612	0.0155014
ASAP1	0.218715	0.000787543	0.0187167
ASPG	-0.983996	8.2511e-07	0.000415209
ASPH	0.312723	0.00127503	0.0250659
ASPM	0.219148	0.000689395	0.0176675
ASPRV1	-1.17124	0.00103525	0.0218189
ASTL	-0.505009	0.00205892	0.0328405
ATAD2	0.313473	2.48782e-05	0.00249277
ATAD5	0.225515	0.00306381	0.0421976
ATF2	0.194937	7.93776e-05	0.0048868
ATG16L2	-0.257845	0.000548043	0.0156627
ATG9B	-1.33848	2.20004e-06	0.000725587
ATP5MC2	-0.239199	0.00377252	0.0478164
ATP6V0A1	-0.266003	0.000729682	0.0181528
ATP6V1C1	0.172986	0.00084964	0.0195417
ATP6V1F	-0.348791	3.36382e-05	0.00291862
ATP8B2	0.343811	0.00372594	0.0475202
ATP8B4	0.262793	0.00312641	0.042665
ATXN2L	0.155529	0.00101541	0.0216234
AURKB	0.200061	0.00203971	0.0327153
AZIN1	0.194429	0.000733829	0.0181528
B3GALNT1	0.365887	0.00367072	0.0471096
B3GALT4	-0.26059	0.00372594	0.0475202
B3GNT4	-0.458616	0.00404332	0.0495609
B3GNT7	0.452422	0.00350076	0.04568
B3GNT8	-0.654969	7.57132e-06	0.0013332
B4GALNT3	-0.384237	0.00149144	0.0269877
B4GALT5	0.23657	0.00103812	0.0218231
BAG2	0.385411	8.36707e-07	0.000415209
BAIAP3	-0.425921	0.00130305	0.0254966
BARX2	-0.528111	0.000147589	0.00686625
BBS12	0.243424	0.00249783	0.0371184
BBX	0.289547	6.02752e-05	0.00414734
BCL2L1	-0.333904	0.000170959	0.00746566
BDH1	-0.351229	0.00329631	0.0441377
BEND6	0.294349	0.00344859	0.0453244
BFAR	0.0956994	0.0013498	0.0258832
BICD2	-0.333911	0.000186492	0.0079531
BICDL2	-0.756169	3.88894e-06	0.000950527
BLNK	-0.508463	0.000687436	0.0176449
BNIPL	-0.673727	1.16816e-05	0.00166346
BPIFC	-1.29003	0.000568307	0.0159116
BRAP	-0.109271	0.00382912	0.0481611
BRCA1	0.246811	0.00147153	0.0268649
BRD9	-0.198444	0.00104675	0.0219202
BRIP1	0.295954	0.000744291	0.0182706
BRPF3	0.223946	0.000759172	0.0183908
BSN	0.709967	0.00277116	0.0398075
BSPRY	-0.830922	1.09518e-05	0.00163322
BTBD11	-0.404801	0.000746401	0.0182706
BTBD16	-1.59269	0.00318212	0.0432811
BTN2A1	0.222986	7.53462e-05	0.00474292
BTN2A2	0.314723	5.0222e-05	0.00373386
BTN3A1	0.352522	0.000468435	0.0141947
BTN3A3	0.315273	0.0024595	0.0366819
BUB1	0.205877	0.00103812	0.0218231
BUB1B	0.235145	0.00126811	0.025058
BVES	0.274169	0.00404332	0.0495609
BX255925.3	-0.568827	2.01305e-05	0.00223574
C10orf99	-1.04616	3.14216e-05	0.0028118
C12orf29	-0.342513	1.50389e-05	0.00196845
C15orf62	-0.629528	0.0039349	0.0490022
C17orf80	0.168935	0.00210477	0.0332378
C1orf112	0.226021	0.000130104	0.00637897
C1orf116	-0.533335	4.01173e-05	0.00330131
C1orf21	-0.258853	0.000108532	0.00586572
C1orf210	-0.254018	0.00254978	0.0376852
C1QA	0.482331	0.00262283	0.0383154
C1QB	0.606019	0.00107602	0.0223332
C1QC	0.647318	0.000198389	0.00822484
C1RL	0.189334	0.00100701	0.0215567
C2CD2L	-0.220229	0.00337167	0.0447081
C2CD4C	-0.528992	0.00175517	0.0297544
C2orf76	-0.269062	0.000434081	0.0133368
C3AR1	0.501856	0.000269341	0.0098674
C4orf3	-0.360446	0.000585636	0.0160643
C5orf15	0.216633	0.00075703	0.0183661
C6orf132	-0.506966	0.000197168	0.00822484
C7orf57	-0.844887	0.00367529	0.0471312
C8orf37	0.324064	9.27925e-06	0.00148777
C8orf74	-1.3648	0.00193654	0.0318082
C9orf16	-0.500893	0.000443091	0.0135627
CADM4	-0.477963	2.9749e-05	0.00273095
CALHM6	0.708738	0.000201457	0.00830997
CAMK1	0.24428	0.000796469	0.018821
CAMKMT	-0.226964	0.00306381	0.0421976
CAMSAP3	-0.37804	0.00173665	0.0295935
CAPNS2	-0.927624	1.17866e-05	0.00166394
CARD14	-0.485876	0.00082613	0.0192717
CARHSP1	-0.455418	0.000139024	0.0066375
CASS4	0.421111	0.00300998	0.0418433
CAT	0.234997	0.00134615	0.0258832
CBFA2T3	-0.561508	2.13589e-05	0.00224214
CBLC	-0.699614	0.000341537	0.0114846
CBX1	0.209028	0.000113493	0.00595687
CBX5	0.190491	0.00319822	0.043464
CCDC102A	0.194813	0.00258939	0.0379623
CCDC120	-0.362381	0.00146758	0.0268526
CCDC171	0.450849	0.000101146	0.00565177
CCDC88A	0.315763	0.000266904	0.0098674
CCDC88B	-0.781083	9.08e-06	0.00148777
CCL4	0.383011	0.000479505	0.0143554
CCL4L2	0.442358	0.000771055	0.0185678
CCNA2	0.225176	0.00228172	0.034921
CCNE2	0.236041	0.000416571	0.0131478
CCNK	0.236292	0.00394464	0.0490215
CCP110	0.194512	0.00391547	0.0488718
CCR1	0.450321	0.000227813	0.00894317
CCSAP	0.17515	0.0013498	0.0258832
CD163	0.597468	0.000260506	0.00971766
CD164L2	-0.873486	5.33934e-06	0.00113772
CD300A	0.411854	0.00189004	0.0312325
CD300C	0.453265	0.00343136	0.0452432
CD53	0.346075	0.00264987	0.0385384
CD55	-0.456301	0.00142474	0.0264831
CD58	-0.254406	0.00155267	0.0274585
CD72	0.435807	0.000556018	0.0158079
CD80	0.555315	0.000807758	0.0189502
CD84	0.353711	0.00338014	0.0447841
CDC40	0.152115	0.00294951	0.0412478
CDC42EP1	-0.305453	0.000944751	0.0208507
CDC5L	0.115671	0.000529333	0.0153422
CDCA7L	0.2587	0.00175053	0.0297371
CDH1	-0.349872	8.01559e-05	0.0049115
CDKN1A	-0.285199	0.00141708	0.0264306
CDKN2D	-0.268748	0.00147947	0.0269197
CDS1	-0.351994	6.78571e-05	0.00444491
CEACAM19	-0.624189	0.00018534	0.0079246
CEBPA	-0.407659	8.41565e-05	0.00504606
CELF5	-1.06517	0.00263572	0.0384096
CELSR2	-0.35906	0.000746401	0.0182706
CENPB	-0.248905	0.00198171	0.0320676
CENPF	0.186203	0.00304063	0.0420908
CENPI	0.264189	0.000278456	0.00995632
CENPN	0.166734	0.00293457	0.0411443
CENPQ	0.179406	0.00218876	0.0339745
CENPV	0.324542	0.00235381	0.0356907
CEP128	0.274521	5.1407e-05	0.00379208
CEP162	0.17738	0.0023783	0.0358298
CEP170	0.376386	3.17268e-06	0.000844364
CERS2	0.199574	0.00381017	0.0480704
CERS3	-0.641619	6.83444e-06	0.00130066
CERS4	-0.3827	0.000713312	0.0180265
CES2	-0.486808	0.000478108	0.0143397
CFAP46	-0.976444	0.00223766	0.0344397
CFAP92	-0.798117	0.0031028	0.0424845
CFB	0.495349	0.00291969	0.0410412
CFD	-0.315516	0.00166876	0.0290102
CHERP	0.197915	0.00386728	0.0484921
CHIC2	-0.16101	0.0013498	0.0258832
CHKA	0.271968	0.00221743	0.0341927
CHMP2A	-0.365387	0.000356085	0.0118281
CHMP4B	-0.230762	0.0009137	0.0203022
CHP1	-0.175289	0.00400358	0.0492953
CHST8	-0.640998	0.00344211	0.0453244
CHTF8	0.30324	0.000119803	0.00613105
CIBAR1	0.142825	0.0039642	0.0491057
CIP2A	0.268681	0.00146758	0.0268526
CITED4	-0.725435	0.00221743	0.0341927
CKAP5	0.258819	0.000526274	0.0152806
CKMT1A	-0.547272	0.00192775	0.0317275
CKMT1B	-0.591275	0.000544882	0.0155996
CLDN17	-1.84058	0.00081453	0.0190282
CLIC3	-1.38512	7.48887e-06	0.0013332
CLPX	-0.213987	0.0034659	0.0454061
CLSPN	0.281516	0.00383863	0.0482066
CMTM1	0.358609	0.0030329	0.0420549
CMTR1	0.147427	0.000422747	0.0131614
CMYA5	0.0705523	0.00152382	0.027183
CNFN	-1.58186	8.44298e-05	0.00504606
CNGA1	-0.558513	0.00071129	0.0180265
CNKSR1	-0.220239	0.00083546	0.0194059
CNKSR3	-0.364249	0.000673867	0.0175163
CNOT11	-0.124434	0.0034659	0.0454061
CNTLN	0.44432	0.000116795	0.00607185
CNTROB	0.136577	0.00284636	0.0404969
COG1	0.216511	2.09174e-05	0.00223885
COMMD1	-0.372224	0.00145578	0.0268526
COPS3	0.174941	1.5525e-05	0.00200187
COX10	0.240849	2.49661e-06	0.000757119
COX6A1	-0.356322	0.00382912	0.0481611
COX6B1	-0.461639	0.00232352	0.0353954
CPT1C	-0.364351	0.000109928	0.00592164
CPVL	0.429448	0.00137933	0.0261443
CRADD	-0.199862	0.000587323	0.0160836
CRB3	-0.510653	2.64713e-05	0.00254997
CRCT1	-1.58659	0.00110908	0.0228456
CREBL2	0.16108	0.0037819	0.0478982
CRLF1	-0.6293	0.00218306	0.0339505
CRYBG2	-0.656085	3.7719e-07	0.000324802
CSF1	0.439332	0.000324621	0.011075
CSF1R	0.524876	0.00185057	0.0307977
CSNK1E	-0.286754	0.000599265	0.0163016
CSTA	-1.07316	3.18471e-06	0.000844364
CSTB	-0.867884	1.15568e-05	0.00166346
CTNNBIP1	-0.377259	0.000158622	0.0071559
CTNND1	-0.272363	0.00246585	0.0367098
CTSO	0.3533	0.00306381	0.0421976
CTSS	0.43471	0.00126811	0.025058
CWH43	-0.866105	0.00361971	0.0467479
CX3CL1	0.322346	0.00314224	0.0428454
CXorf21	0.399465	0.00369824	0.0472774
CYB5R2	-0.468096	0.00166876	0.0290102
CYBB	0.427879	0.0026909	0.0389966
CYP2C18	-0.75615	0.000810006	0.0189502
CYP2C19	-0.719022	0.00205955	0.0328405
CYP2C9	-0.674375	0.0011874	0.0240133
CYP4F22	-1.23297	0.000198389	0.00822484
CYP8B1	-0.837472	0.00136392	0.0259824
CYRIB	0.142645	0.00341421	0.0450533
CYSLTR2	0.441065	0.00354478	0.0460709
CYSRT1	-1.60485	1.99052e-06	0.000708626
DAB2	0.298527	0.00166432	0.0289946
DAGLA	0.343636	0.00211027	0.0332516
DBF4B	0.281679	0.000129693	0.00637792
DBI	-0.34259	0.00190003	0.0313028
DBNL	-0.235395	0.00235991	0.0357171
DCAF7	0.169379	0.00150351	0.0270863
DCSTAMP	-0.244696	0.00147567	0.0268805
DCTN2	-0.164855	0.000896026	0.0201004
DCUN1D3	-0.402089	0.00124757	0.024824
DDX24	0.161286	0.00166432	0.0289946
DEFB4A	-1.82738	0.000537147	0.0154865
DEFB4B	-0.860969	0.00143591	0.0266604
DEK	0.167465	0.00217738	0.0338943
DENND10	-0.181905	0.000984939	0.021307
DENND2C	-0.518438	1.94397e-05	0.00219548
DENND5A	0.369113	2.90768e-06	0.000844364
DERL2	0.114056	0.000742188	0.0182706
DGKD	0.186612	0.00175517	0.0297544
DHCR24	-0.332564	0.00168662	0.0291981
DHRS1	-0.543437	0.00244054	0.0365005
DHX16	0.240789	0.00133164	0.025807
DHX32	-0.168544	0.000893528	0.0200995
DHX33	0.271673	2.43677e-05	0.00248033
DHX9	0.137245	0.000335475	0.0113273
DIAPH3	0.312295	0.000721454	0.0180887
DLGAP2	-0.952674	0.000138529	0.00663318
DLL1	0.441679	0.000156159	0.00708384
DLX5	-0.453054	8.3884e-05	0.00504606
DMKN	-1.0678	0.00032365	0.0110649
DNAJA1	0.357785	0.000149455	0.00689427
DNAJC10	0.259943	0.00260272	0.0380895
DNAL1	0.255152	0.000107495	0.00582896
DNMT1	0.222457	0.000643782	0.0169495
DOCK3	-0.465018	0.000301162	0.0104933
DOK4	-0.448927	0.000143021	0.00674962
DPH1	0.287891	3.96206e-07	0.000324802
DPY19L4	0.224876	6.22967e-05	0.0042295
DRG2	0.210302	3.80229e-06	0.000950527
DSC1	-1.29164	0.00395431	0.0490215
DSC2	-0.639856	8.04169e-05	0.0049115
DSC3	-0.303219	0.000998684	0.0215474
DSG1	-0.78028	0.00146758	0.0268526
DSG3	-0.571525	4.85741e-05	0.00366566
DSTN	-0.317898	6.73494e-06	0.00130066
DTD1	-0.391113	0.000335475	0.0113273
DTL	0.28422	0.000411691	0.0131296
DUOX1	-0.518316	0.000709273	0.0180078
DUOXA1	-0.529228	0.000376756	0.0122659
DUSP22	-0.24518	0.00047118	0.01421
DVL2	0.261869	2.08447e-05	0.00223885
DYNLL1	-0.367078	0.000202094	0.00831532
DYNLT3	-0.372506	0.00134615	0.0258832
DZIP1	0.238683	0.00219446	0.0339986
DZIP1L	0.410314	0.000421505	0.0131478
DZIP3	0.273945	0.00169111	0.0291981
E2F5	0.241886	0.00315018	0.0429179
EBP	-0.526273	0.00217738	0.0338943
EBPL	-0.35387	0.000299356	0.0104749
ECM1	-0.81116	0.000798715	0.0188469
EDDM13	-0.532541	0.00109394	0.0226192
EFCAB2	0.272249	0.00179278	0.0302042
EFNA3	-0.774806	2.33039e-06	0.000725587
EFNA4	-0.273274	0.00180229	0.0303022
EFR3A	0.216105	0.000982212	0.0213042
EIF2AK2	0.218686	0.00200788	0.0323952
EIF2B4	-0.224398	0.00116204	0.0236747
ELAC2	0.232077	5.64171e-05	0.00397448
ELK1	0.324182	0.00116523	0.0236747
ELOF1	-0.236792	0.00400358	0.0492953
ELOVL1	-0.322985	4.77694e-05	0.00366566
ELOVL5	0.22441	0.00196099	0.0319422
ELP5	0.0564162	0.000903562	0.0202141
EMC6	0.294343	0.00107602	0.0223332
EML3	-0.194603	0.00153612	0.0273133
EML4	0.153688	0.00309497	0.0424127
ENDOU	-1.44859	0.000204601	0.00839735
ENKUR	-0.733252	4.52029e-05	0.00359341
ENSA	-0.223166	0.00176451	0.0298817
ENTPD2	-0.71839	0.000102782	0.00568634
ENY2	0.0721036	0.00369824	0.0472774
EPB41L2	0.340342	0.0013868	0.0261443
EPB41L4B	-0.485313	0.000116053	0.00605252
EPHA1	-0.375244	0.00151566	0.0271559
EPHB2	0.434979	0.00150351	0.0270863
EPHB3	-0.408087	0.00329631	0.0441377
EPN1	-0.228777	0.00104387	0.0219158
EPS8	0.242021	0.0028175	0.0402964
EPS8L1	-0.790515	3.78803e-06	0.000950527
ERBB2	-0.339188	0.00262957	0.0383795
ERBB3	-0.448599	2.21914e-05	0.00231469
ERCC6L	0.190082	0.00298717	0.0416323
ERMAP	0.164684	0.00407336	0.0498173
ESRP2	-0.453115	3.62477e-05	0.00309163
ESYT3	-0.553787	0.00207743	0.0329971
ETHE1	-0.45804	0.000210348	0.0085688
ETV1	0.493532	0.00137189	0.0260627
ETV2	-0.49428	0.00123068	0.0245776
EVPL	-0.754556	1.1625e-06	0.000500975
EXD2	0.251241	0.00158627	0.027932
EXO1	0.309751	5.85091e-05	0.00407721
EXOC3	-0.295401	8.55314e-05	0.00507486
EXOC6B	-0.236924	0.000931696	0.0206461
EXOSC10	0.150846	0.00114309	0.0233991
EXPH5	-0.382063	0.00331293	0.0442155
F11R	-0.155935	0.00373521	0.0476014
FAAH2	-0.228977	0.00267031	0.0388013
FADD	0.622037	0.000143924	0.00677271
FAM110A	-0.335386	0.000670036	0.0174722
FAM160B2	-0.182053	0.00331293	0.0442155
FAM161A	0.286458	0.00183112	0.0305672
FAM161B	0.233071	0.00333799	0.0444414
FAM169A	0.387268	0.000247385	0.00944332
FAM171B	0.501919	0.00233559	0.0355132
FAM25A	-1.1901	0.000268437	0.0098674
FAM25C	-1.45109	0.00118358	0.023988
FAM83C	-0.808164	0.00035187	0.0117357
FAM89A	-0.332914	0.00136449	0.0259824
FAM98C	-0.283174	0.00345724	0.0454016
FANCA	0.209631	0.00322249	0.0436128
FANCM	0.285835	0.00118776	0.0240133
FAP	0.4961	0.00146364	0.0268526
FBRS	-0.138214	0.00312641	0.042665
FBXL14	0.333789	5.28033e-06	0.00113772
FBXL22	-0.402604	0.000142124	0.00672665
FBXO25	-0.200194	0.00305607	0.0421976
FBXO39	0.4314	0.00225229	0.0345999
FBXO5	0.255725	0.000687436	0.0176449
FCER1G	0.374823	0.00206659	0.0328887
FCGR1A	0.41864	0.000854415	0.0195965
FCGR2A	0.523274	0.00176919	0.0298991
FCGR3A	0.647344	3.07841e-05	0.0027699
FCHSD1	-0.461441	0.00111827	0.0230059
FDXR	-0.510962	5.98784e-05	0.00414734
FEM1B	-0.190853	0.000721454	0.0180887
FFAR2	-0.631711	0.00122399	0.0244738
FGF22	-0.703735	0.000725352	0.0181073
FKBP1A	-0.252976	0.000947382	0.0208526
FKRP	0.196034	0.000871327	0.0199008
FLCN	0.230367	5.03897e-05	0.00373386
FLII	0.208104	0.000386934	0.0124979
FNDC10	-0.5103	0.0012074	0.0242308
FNDC11	-0.553824	0.000145288	0.00681731
FNDC3A	0.269494	0.000412906	0.0131296
FOXM1	0.387713	1.1935e-05	0.00167049
FOXN1	-0.599434	0.000686458	0.0176449
FOXO3B	0.332642	0.000113856	0.00595687
FPR3	0.51032	0.00127157	0.025058
FTH1	0.344764	0.00211027	0.0332516
FUBP1	0.14107	0.00225229	0.0345999
FUT1	-0.466303	6.90522e-07	0.000389931
FUT2	-0.395781	0.000205865	0.00842812
FUT3	-0.625778	0.00346157	0.0454061
FUT8	0.22399	0.00169111	0.0291981
FXR2	0.126907	0.00186037	0.0309293
GALK1	-0.444256	0.0025367	0.0375937
GALM	0.274414	0.00105545	0.022018
GATA4	-0.982043	0.00344335	0.0453244
GATA6	0.439157	0.000668129	0.0174502
GCNT1	0.652124	0.00161621	0.0283071
GCOM1	-1.2426	0.00019656	0.00822484
GDPD3	-1.10284	1.76855e-05	0.00211399
GEM	0.413396	0.000339505	0.0114398
GEMIN4	0.180061	0.00304834	0.0421619
GEMIN5	0.205638	0.00287549	0.0407344
GFM2	0.162778	0.00179278	0.0302042
GFOD2	-0.301837	0.000421505	0.0131478
GGACT	-0.317627	0.000597545	0.0162819
GGT6	-0.468245	0.000250416	0.00953676
GID8	-0.208961	7.01183e-05	0.00455658
GIMAP2	0.396616	0.0023783	0.0358298
GIMAP6	0.356109	0.00352711	0.0459141
GINS4	0.231754	0.00255635	0.0377142
GIPC1	-0.44897	1.86996e-07	0.000248769
GIPR	-0.528295	0.000158127	0.00715326
GJB2	-0.703329	0.00221167	0.0341682
GJB3	-0.242546	0.002138	0.0334722
GJB5	-0.287227	0.000476715	0.0143242
GJB6	-0.682852	0.000774329	0.018593
GJD3	0.56745	0.000695303	0.0177633
GLB1L2	-0.745371	0.00387688	0.048501
GLOD4	0.152858	0.00154025	0.0273273
GLRX3	-0.21303	0.00127157	0.025058
GLTP	-0.82529	7.90063e-09	4.31269e-05
GNA15	-0.318646	0.00234772	0.0356314
GNB2	-0.253344	0.000131344	0.00642057
GNE	0.267169	0.00153201	0.0272995
GNRHR	-1.11504	2.54864e-05	0.00251424
GNS	0.272009	0.00132444	0.0257283
GOLGA7B	-0.609827	0.00198171	0.0320676
GPC4	0.674229	8.92063e-05	0.0051787
GPR135	0.282515	0.000583953	0.0160643
GPR137C	0.36281	0.00395441	0.0490215
GPR161	0.360479	0.00116523	0.0236747
GPR34	0.647325	0.000569005	0.0159116
GRHL1	-0.754293	1.15983e-05	0.00166346
GRHL3	-0.696853	7.41267e-05	0.00472334
GRIN1	-0.900096	0.00052323	0.0152192
GTF2B	-0.151064	0.00376316	0.0477717
GTF2H2C	0.211172	0.000638282	0.0169283
GTSE1	0.229112	0.000246633	0.00944332
H2BC8	-0.19523	0.00075703	0.0183661
HAGH	-0.175837	0.00395441	0.0490215
HAL	-1.41893	0.000785326	0.0186926
HASPIN	0.402253	3.19679e-06	0.000844364
HAVCR2	0.40674	0.000785327	0.0186926
HDAC5	-0.218554	0.00110301	0.0227778
HEBP2	-0.351329	0.000416571	0.0131478
HELB	0.274802	0.000169369	0.00743588
HES5	-0.963349	3.06368e-07	0.000324802
HIGD1A	-0.455843	0.000111697	0.00593827
HIP1R	-0.341264	1.32828e-05	0.00182561
HK3	0.228549	0.00168662	0.0291981
HLTF	0.277623	0.00154438	0.0273709
HMGCR	-0.382772	0.00104675	0.0219202
HMGCS1	-0.397748	0.00242171	0.0363501
HMGN2	0.170179	0.00381964	0.0481157
HNRNPA2B1	0.097319	0.00176919	0.0298991
HNRNPU	0.113044	0.000281841	0.0100554
HOMER2	-0.558149	3.83097e-06	0.000950527
HOPX	-0.90224	7.24506e-05	0.00467107
HOXB3	0.526746	0.00387688	0.048501
HPS3	0.226577	0.000369013	0.0121101
HPS5	0.198075	0.00144018	0.0266793
HPS6	-0.162948	0.00140187	0.0262665
HSD17B1	-0.782804	0.000152294	0.0069664
HSP90AA1	0.360519	4.41687e-06	0.00103118
HSPD1	0.23796	0.000537055	0.0154865
HTR3A	-0.239717	0.00074251	0.0182706
HVCN1	0.337819	0.000169897	0.00743914
HYAL1	-0.805854	1.40929e-07	0.000230786
ICAM1	0.415661	0.00261611	0.0382513
ID1	-0.656477	2.44521e-05	0.00248033
IDI1	-0.329691	0.000277615	0.00994799
IER2	-0.590558	0.000214922	0.00873342
IFIT2	0.712831	0.00300236	0.0417728
IGFBP2	-0.617684	0.00341421	0.0450533
IGSF22	-0.830527	0.00208287	0.0330259
IGSF8	-0.285584	9.66964e-05	0.00549689
IL1F10	-1.31309	0.00204494	0.032737
IL1RN	-1.05794	6.71378e-07	0.000389931
IL2RA	0.473044	0.00289016	0.040801
IL2RB	0.291211	0.00289016	0.040801
IL36A	-1.07487	0.00321855	0.0436128
IL36B	-0.413443	0.00064537	0.016964
IL36G	-0.757217	5.58589e-05	0.00397448
IL36RN	-0.910671	1.66595e-05	0.00209501
IL4I1	0.198137	0.00344859	0.0453244
ILK	0.383294	0.00162463	0.0284241
ILVBL	-0.346488	7.78425e-05	0.00481038
IMPA2	-0.397663	0.00216042	0.0337587
INCA1	0.3124	0.000129283	0.00637792
INKA1	-0.524691	8.66222e-06	0.00144747
INO80C	-0.35851	1.93719e-05	0.00219548
INTS7	0.188136	0.000893528	0.0200995
IPO9	0.180967	0.000119046	0.00613105
IQCJ-SCHIP1	0.326868	2.9851e-05	0.00273095
IQGAP2	0.566259	0.00131014	0.025572
IRF5	-0.386124	0.0024914	0.0370565
ITGA4	0.695649	0.000607932	0.0164012
ITPKC	-0.375678	0.00049657	0.0147049
ITSN2	-0.286123	0.000984939	0.021307
IVL	-1.02164	2.53988e-05	0.00251424
IZUMO1	-0.753405	0.00171372	0.0293862
JUNB	-0.338734	0.00179753	0.0302532
JUP	-0.463386	1.38125e-05	0.00185404
KAT5	0.145432	0.000767799	0.0185678
KATNBL1	-0.250765	0.000430272	0.0133197
KAZALD1	-0.842504	1.48275e-05	0.00196845
KAZN	-0.329947	0.00146758	0.0268526
KCMF1	-0.230399	7.84946e-07	0.000414654
KCNE3	0.64607	0.000585636	0.0160643
KCNJ5	0.801344	0.00114623	0.0234048
KCNK10	-0.656204	0.00287549	0.0407344
KCNK6	-0.663183	7.69414e-07	0.000414654
KCNK7	-0.68367	4.65083e-05	0.00366566
KCNQ5	0.381927	0.00212687	0.0333617
KCP	-0.522318	0.000483719	0.0144551
KCTD15	-0.255022	0.0009137	0.0203022
KCTD21	-0.294707	0.000284406	0.0101029
KIAA0753	0.302488	4.95851e-07	0.000324802
KIF14	0.216331	0.00269779	0.0390274
KIF18A	0.258397	0.0013608	0.0259726
KIF18B	0.303015	0.000613189	0.0164886
KIF20A	0.287528	0.000469806	0.0141947
KIF24	0.42984	1.85753e-05	0.00217278
KIF4A	0.191804	0.00139432	0.026185
KLC2	0.191265	0.00256292	0.0377432
KLF8	-0.575929	4.85741e-05	0.00366566
KLHL5	0.248958	0.00119754	0.0241217
KLK1	-0.607823	7.46122e-05	0.00473585
KLK11	-0.887634	2.88457e-05	0.00266879
KLK12	-1.3344	0.00019562	0.00822484
KLK13	-1.135	0.000229212	0.00894317
KLK14	-0.296895	0.00198171	0.0320676
KMT5A	-0.192506	0.000247385	0.00944332
KNDC1	-0.796916	2.12107e-05	0.00224095
KPNB1	0.135038	0.00276763	0.0397917
KPRP	-2.24982	0.000256177	0.00966627
KRT16	-1.03336	0.000607932	0.0164012
KRT17	-0.779605	0.000125251	0.00629176
KRT6A	-0.546132	0.00242171	0.0363501
KRT6B	-0.853689	0.00284636	0.0404969
KRT78	-1.32876	8.83452e-05	0.00516522
KRT80	-0.897942	1.33777e-05	0.00182561
L3MBTL3	0.225568	0.000604451	0.0163882
LAD1	-0.380545	0.000159119	0.0071586
LAIR1	0.484401	0.000434081	0.0133368
LANCL3	-0.500851	0.000123672	0.00623154
LAP3	0.421672	0.000906086	0.0202429
LARS2	0.222535	0.000947382	0.0208526
LASP1	0.213608	0.00228172	0.034921
LBH	0.214825	0.00285362	0.0405649
LCA5	0.266328	0.00381017	0.0480704
LCE1F	-1.50447	0.00392513	0.048955
LCE2B	-1.73391	0.00393933	0.0490201
LCE3A	-1.49277	0.00306739	0.0422113
LCE3D	-1.54569	0.000926516	0.0205591
LCE3E	-1.55719	0.000683421	0.0176449
LCMT1	-0.282891	0.00183112	0.0305672
LCP2	0.344234	0.00189004	0.0312325
LENG9	-0.331108	0.000105789	0.00575549
LEXM	-1.3899	5.45769e-05	0.00395465
LGALS7B	-0.791765	0.000488679	0.0145238
LGALS9	0.482944	0.000794229	0.0187952
LGALSL	-0.776564	1.26255e-06	0.000516888
LILRB4	0.368697	0.00190003	0.0313028
LIN52	0.186702	0.000944751	0.0208507
LIN7B	-0.442662	0.00149948	0.0270863
LIPG	-0.33833	0.00311065	0.0425564
LIPM	-0.740992	0.00290782	0.0409797
LIPN	-0.816794	7.29686e-06	0.0013332
LLGL2	-0.478746	6.25023e-05	0.0042295
LMAN2L	0.165744	0.00141326	0.0263895
LMNA	-0.298591	0.000573948	0.0159305
LMNB1	0.248594	0.000570648	0.0159116
LMTK3	-0.478964	1.85104e-05	0.00217278
LRFN2	-0.839792	0.00087346	0.0199217
LRIG1	0.295293	0.000963313	0.0210336
LRRC1	-0.383631	2.03423e-05	0.00223574
LRRC25	0.445293	0.000888549	0.0200702
LRRC28	-0.17279	0.00407336	0.0498173
LRRC56	-0.387406	0.00194559	0.0318928
LRRC75A	0.196301	0.00331293	0.0442155
LRRCC1	0.295529	0.000465705	0.0141491
LSS	-0.260959	0.00159904	0.0280964
LTA4H	-0.333437	6.74133e-05	0.00444491
LTBP2	0.390577	0.000944751	0.0208507
LY6G6C	-1.24534	9.6076e-05	0.00548202
LYPD3	-0.800851	1.73854e-06	0.000632675
LYSMD4	-0.36245	1.75001e-05	0.00211399
M6PR	0.21495	0.00148345	0.0269622
MAB21L4	-0.932446	0.000955317	0.0209148
MACO1	-0.153311	0.00375382	0.0476902
MAGIX	-0.619605	1.78727e-05	0.00212089
MAL	-1.19966	0.00340566	0.045013
MAL2	-0.374038	0.00076997	0.0185678
MAP1S	0.173728	0.00324693	0.0436908
MAP3K6	-0.283883	0.000227117	0.00894056
MAPK13	-0.293222	0.00380073	0.0480623
MAPK3	-0.300454	0.000412906	0.0131296
MAPKAP1	-0.177545	0.000552815	0.0157442
MASP1	-0.0797869	0.00147153	0.0268649
MAST4	-0.33936	0.00155684	0.0275025
MAZ	0.163824	0.00402341	0.0494279
MBD2	-0.262258	5.64171e-05	0.00397448
MBOAT2	-0.458194	0.00259605	0.0380259
MCEE	-0.226386	0.000640111	0.0169283
MCM2	0.367599	0.000229914	0.00894317
MCM4	0.302826	0.00067579	0.0175384
MDC1	0.221424	0.00071941	0.0180887
MDK	0.397135	0.000366828	0.0121101
MED18	-0.293827	7.60871e-05	0.00475573
MED8	-0.226179	0.000641944	0.0169283
MED9	0.180672	0.00037121	0.0121579
MELK	0.408374	0.000461637	0.0140516
MEMO1	-0.232119	0.000965992	0.021064
MERTK	0.375102	0.000216246	0.00874382
METRNL	-0.62394	8.17321e-06	0.00137984
METTL16	0.0832629	0.00182146	0.0304993
METTL4	0.195433	0.000512708	0.014993
MFSD14A	0.307723	0.000111339	0.00593827
MFSD2B	-0.541999	0.00258275	0.0379623
MFSD5	-0.298207	0.000117915	0.00611071
MGAT2	0.556646	4.3049e-07	0.000324802
MILR1	0.392675	0.00212687	0.0333617
MINDY1	-0.247241	0.00189503	0.0312833
MIOS	-0.155828	0.00237215	0.0358298
MIS12	0.199122	1.75617e-05	0.00211399
MIS18BP1	0.25074	0.00193538	0.0318082
MISP3	-0.518014	0.000352919	0.0117468
MITF	0.319704	0.00288282	0.0407677
MMAB	-0.460314	0.000300258	0.0104841
MMP17	-0.601081	0.000286992	0.0101507
MMS22L	0.195222	0.00360725	0.0466828
MOB2	-0.311442	0.00271163	0.0391584
MOSPD3	-0.234311	0.000783115	0.0186926
MPDZ	0.442376	0.000567367	0.0159116
MPHOSPH9	0.295049	8.86314e-05	0.00516522
MPZL2	-0.449308	7.70856e-05	0.00479724
MPZL3	-0.573765	2.30547e-05	0.00237449
MREG	-0.4091	0.000641944	0.0169283
MRPS28	0.31185	7.03766e-06	0.00130964
MS4A4A	0.628828	0.000258144	0.00971766
MS4A6A	0.548932	0.00112442	0.0231036
MS4A7	0.569648	0.000274277	0.00992329
MSH6	0.20596	0.00051122	0.0149763
MSI2	0.346559	0.00113372	0.0232363
MSMO1	-0.525901	9.51524e-05	0.00544831
MSR1	0.507321	0.000150868	0.00692049
MT-ND1	-0.274433	0.00399371	0.0492953
MTA1	0.207683	0.00139055	0.0261443
MTBP	0.266517	0.000275942	0.00993148
MTFP1	0.351893	0.000386934	0.0124979
MTHFD1	0.314932	5.27937e-05	0.00384244
MTHFS	0.372297	9.35296e-07	0.000437612
MTR	0.254525	0.000179122	0.00773958
MTSS2	0.183551	0.00202905	0.0326402
MTTP	0.505447	0.00134458	0.0258832
MUC15	-0.64718	0.00244677	0.0365587
MVB12B	0.23166	0.00108495	0.0224615
MVD	-0.590759	2.49642e-05	0.00249277
MVK	-0.462404	1.08285e-06	0.000492577
MXD1	-0.45486	0.000744291	0.0182706
MXI1	-0.204761	0.0036616	0.0470662
MYBBP1A	0.252487	1.67771e-05	0.00209501
MYBL1	0.249065	0.00196615	0.0319422
MYCL	-0.423933	0.00201316	0.0324483
MYH3	0.64387	0.00337167	0.0447081
MYO1H	-0.802473	5.19227e-05	0.00381294
MYO5B	-0.588622	0.000752761	0.0183661
MYZAP	-1.01092	9.34659e-06	0.00148777
N4BP3	-0.47978	0.0001225	0.0062107
NAA20	-0.297999	0.00119754	0.0241217
NAA80	-0.313275	0.00306381	0.0421976
NACA	-0.338719	0.000127252	0.00633397
NAIF1	-0.167972	8.28024e-05	0.00500359
NAIP	0.519529	0.00053086	0.0153593
NBEAL2	-0.415271	0.000837808	0.0194059
NBN	0.271331	9.17911e-06	0.00148777
NBPF9	0.306805	0.000789766	0.0187167
NCAPD2	0.149776	0.000293997	0.0103538
NCAPG	0.319592	8.49789e-05	0.00506042
NCAPH	0.348371	3.74964e-05	0.00313286
NCBP3	0.192375	3.38678e-05	0.00291862
NCCRP1	-1.10421	2.66542e-05	0.00255257
NCKAP5L	0.227079	0.000306643	0.0106165
NCOR1	0.233466	0.00019656	0.00822484
NDUFA4L2	-0.72349	0.000842522	0.0194875
NECAP1	0.169031	0.00148744	0.0269813
NECTIN1	-0.423234	4.66505e-07	0.000324802
NECTIN4	-0.518355	1.64659e-06	0.000612832
NEDD9	0.428725	3.82651e-05	0.00318086
NEIL3	0.379126	0.000137716	0.00661358
NEK1	0.179268	0.00350076	0.04568
NEK2	0.168163	0.00196099	0.0319422
NEK4	0.22882	0.000148053	0.00686834
NEK8	0.200926	0.000807758	0.0189502
NEK9	0.230245	0.000717372	0.0180734
NEMP1	0.381228	0.000952665	0.0209127
NEURL4	0.305993	2.61231e-08	8.55583e-05
NEXN	0.362357	0.000685482	0.0176449
NFIB	0.339214	0.00294203	0.0412136
NFYA	0.139054	0.00174589	0.02972
NGRN	0.242872	1.99905e-05	0.00223574
NHEJ1	0.248333	0.00100701	0.0215567
NHLRC3	0.180921	0.000830783	0.0193526
NIBAN2	-0.385566	7.54374e-06	0.0013332
NKPD1	-0.865485	7.0579e-05	0.00456839
NLN	0.233484	0.000408066	0.0130517
NLRX1	-0.582851	2.68383e-05	0.00255526
NOL3	-0.380914	0.0013137	0.0255805
NONO	0.137412	0.000888549	0.0200702
NOP10	-0.351704	0.00367072	0.0471096
NOP2	0.234281	0.000849637	0.0195417
NPC1L1	-0.910154	0.00140849	0.0263305
NR1H3	0.224924	0.00169561	0.0291981
NR2F6	-0.308012	0.0020558	0.0328405
NR5A1	-1.23509	0.00244065	0.0365005
NRK	0.972958	0.000403841	0.0129419
NRP1	0.291654	0.00264987	0.0385384
NRTN	-0.808241	0.000321718	0.0110219
NSD2	0.232797	0.000656787	0.0172089
NSDHL	-0.301032	0.000883597	0.020069
NSL1	0.111986	0.000270977	0.00990518
NTN1	0.479448	0.000618487	0.0166038
NTSR1	-1.39	0.00104906	0.0219247
NUAK1	0.407682	0.000400905	0.012873
NUDCD1	0.29217	0.0001225	0.0062107
NUDT18	-0.36606	0.000160117	0.00718376
NUDT3	0.35124	0.000299356	0.0104749
NUDT8	-0.644976	4.03888e-05	0.00330703
NUP133	0.127996	0.00231151	0.035278
NUP153	0.196417	0.00387688	0.048501
NUP160	0.258024	0.00063464	0.016899
NUP43	0.150094	0.00118128	0.0239711
NUP88	0.213436	0.000104778	0.00571946
NVL	0.243362	4.87705e-08	9.98331e-05
OLFML3	0.327487	0.00407336	0.0498173
ORC3	0.134614	0.00139055	0.0261443
OSBPL2	-0.195946	0.00243425	0.0364714
OSTF1	-0.178837	0.00170465	0.0292615
OTOP2	-0.807029	0.000110336	0.00592413
OTOP3	-0.596742	0.00169481	0.0291981
OVOL1	-0.597183	0.000974071	0.0211838
P2RY2	-0.346116	0.000713312	0.0180265
PAIP2B	-0.362781	0.000273449	0.00992329
PARD6G	-0.35063	2.11371e-05	0.00224095
PARP1	0.187145	0.0015116	0.0271128
PARP11	0.261623	0.00119101	0.0240494
PARP3	0.297593	0.00311852	0.0426285
PATZ1	0.286551	3.6867e-05	0.00309608
PCBP4	-0.307436	0.000589016	0.016103
PCDH1	-0.580936	1.06416e-05	0.00162522
PCGF2	0.300415	5.399e-06	0.00113772
PCNX1	0.175969	0.00282469	0.0403288
PCNX4	0.212835	0.000103443	0.00570365
PDZK1IP1	-0.823116	3.64943e-05	0.00309608
PEG10	0.502844	0.000146205	0.00684071
PELP1	0.101481	0.0013868	0.0261443
PERP	-0.500169	2.34832e-06	0.000725587
PFAS	0.316978	1.47076e-06	0.00056012
PGLYRP2	-0.965884	0.00364325	0.0469409
PGLYRP3	-0.729039	0.000104778	0.00571946
PGLYRP4	-0.916809	2.81129e-05	0.00263072
PHF12	0.198035	2.06279e-05	0.00223711
PHGDH	0.324813	0.00375382	0.0476902
PHLDB3	-0.450846	4.20544e-05	0.00339253
PHLPP2	0.184472	0.00142091	0.0264719
PI3	-1.39091	1.64264e-05	0.00209501
PIGO	0.181991	0.00161621	0.0283071
PIK3AP1	0.211712	0.00325511	0.043765
PIK3C2B	-0.244032	0.00401348	0.04938
PIK3R1	0.413316	6.60981e-05	0.00441805
PIM1	-0.339058	0.0029197	0.0410412
PIMREG	0.299882	2.61091e-05	0.00253259
PIP5KL1	-0.543263	4.69775e-05	0.00366566
PITHD1	-0.219321	0.000723503	0.0180887
PKDCC	0.0613301	0.00076997	0.0185678
PKP1	-0.426586	0.000425242	0.013214
PLA2G4E	-1.19232	7.36441e-05	0.00471092
PLA2G4F	-0.670534	8.77755e-05	0.00515202
PLA2G7	0.520375	0.000369013	0.0121101
PLCD1	-0.577985	0.000264488	0.00984376
PLCXD1	-0.581026	6.48072e-05	0.00434952
PLD1	-0.331056	0.00198692	0.0321202
PLEKHA1	-0.232795	0.000153252	0.00697126
PLEKHM1	-0.311255	0.000517193	0.0150972
PLEKHN1	-0.405839	0.000653047	0.0171383
PLPPR2	-0.322002	0.000100822	0.00565177
PLSCR1	0.275938	0.00400358	0.0492953
PLXNC1	0.42042	0.0027889	0.0400272
PMS1	0.129324	0.00377252	0.0478164
PMVK	-0.42263	0.00116523	0.0236747
PNKD	0.114392	0.000164169	0.0072857
PNMA1	0.325999	0.000215583	0.00873859
POC5	0.177124	0.00225815	0.0346574
POF1B	-1.16	0.000277615	0.00994799
POFUT2	0.236394	9.2134e-05	0.00531263
POLA1	0.225278	0.00104965	0.0219247
POLK	0.248783	0.000183624	0.0078718
POLR1D	-0.167853	0.00333799	0.0444414
POLR2J	-0.368567	0.00156101	0.0275465
POLR2J3	-1.11167	0.00038012	0.0123509
POU2F3	-0.556171	0.000129693	0.00637792
PPBP	-0.741351	0.00360897	0.0466828
PPFIA3	-0.483531	1.49328e-05	0.00196845
PPIL4	0.14949	0.0014755	0.0268805
PPL	-0.789924	0.000150868	0.00692049
PPP1CB	-0.228149	1.70149e-05	0.00209501
PRADC1	-0.312517	0.00283189	0.0403964
PRDX3	0.139322	0.000283549	0.0100943
PRDX5	-0.363399	0.00290489	0.0409738
PRIM1	0.25244	0.00087867	0.0200127
PRIM2	0.187289	3.67424e-05	0.00309608
PRIMPOL	0.22013	0.000957975	0.020945
PRKD3	0.233368	0.000487968	0.0145238
PRKDC	0.271864	0.0014597	0.0268526
PRKRA	0.192617	1.68363e-05	0.00209501
PRMT5	0.270849	0.0010324	0.0218149
PRPF8	0.192639	0.000228512	0.00894317
PRPS1	0.140814	0.000133436	0.00648414
PRR5L	0.220994	0.00371668	0.0474761
PRR9	-0.804076	0.00042143	0.0131478
PRRG2	-0.32294	0.000383513	0.0124364
PRSS27	-1.33462	6.46842e-06	0.00127623
PRSS8	-0.364244	0.00110604	0.0228118
PRXL2A	-0.332645	0.000209058	0.00853749
PSD4	-0.198288	0.00218876	0.0339745
PSENEN	-0.231501	0.00239681	0.0360424
PSMA6	0.2218	0.00279603	0.0400593
PSMC1	0.24318	4.9063e-05	0.00366875
PSMC3IP	0.232955	0.00363433	0.0468628
PSORS1C2	-1.72452	6.22912e-05	0.0042295
PTGER1	-0.920875	0.00130317	0.0254966
PTGER2	0.865294	4.82507e-05	0.00366566
PTGER4	0.293586	0.00075703	0.0183661
PTGES	-0.521989	0.00408341	0.0498658
PTK6	-0.643096	8.63665e-05	0.00510405
PTPRJ	0.299675	0.00134251	0.0258832
PTPRO	0.361078	0.00369824	0.0472774
PTS	-0.271522	0.00196615	0.0319422
PYM1	-0.321042	0.000102453	0.00568634
QSOX1	-0.373633	0.000952665	0.0209127
QTRT2	0.204988	0.00175053	0.0297371
R3HDM4	-0.159992	0.0037913	0.0479802
RAB10	-0.290906	0.000294884	0.0103627
RAB11A	-0.353754	3.00874e-06	0.000844364
RAB22A	-0.212745	0.00320629	0.0435375
RAB23	0.285561	0.000687436	0.0176449
RAB25	-0.68905	4.81328e-08	9.98331e-05
RAB29	0.243563	0.000220941	0.00884627
RAB39A	0.773902	0.000223663	0.00891168
RAB42	0.337454	0.00409349	0.0499516
RAB43	0.331753	2.88457e-05	0.00266879
RAB44	-0.900534	0.000473247	0.0142461
RAB5B	-0.214251	0.000169369	0.00743588
RABEP1	0.23311	1.94397e-05	0.00219548
RABGEF1	-0.267448	0.000559239	0.0158445
RABGGTA	-0.342373	0.00135712	0.0259629
RAC1	-0.286051	5.81329e-06	0.00118998
RAD21	0.157137	0.000733829	0.0181528
RAD51AP1	0.308495	0.000104778	0.00571946
RAD54L	0.234617	0.00350076	0.04568
RAET1E	-0.836284	0.00124079	0.0247191
RAI1	0.228299	0.000457603	0.0139548
RALA	-0.136197	0.000979491	0.0212734
RAMAC	-0.181148	0.0018801	0.0311941
RAMACL	-0.669079	0.00219438	0.0339986
RAPGEFL1	-0.503442	0.000372313	0.0121696
RARG	-0.333582	2.84213e-06	0.000844364
RASAL1	-0.912296	4.12756e-07	0.000324802
RAVER1	0.277248	0.000236326	0.0091491
RBBP4	0.190973	0.000326569	0.0111183
RBBP8NL	-0.550731	0.000722477	0.0180887
RBM12B	0.237971	0.000572296	0.0159116
RBMX	0.0780151	0.00299476	0.0417025
RCAN3	-0.168235	0.000883597	0.020069
RCBTB1	0.323659	0.00127503	0.0250659
RDH13	-0.471318	4.74511e-05	0.00366566
RECQL	0.202473	0.000190577	0.00806432
REEP4	-0.296778	0.00152382	0.027183
REEP6	-0.432609	0.000582274	0.0160527
RELCH	-0.352962	0.000837808	0.0194059
REPS2	0.246315	0.00281032	0.0402289
REXO2	-0.291194	0.00211579	0.0332516
RFC1	0.197707	0.0002223	0.00887897
RGS12	-0.263538	0.00331293	0.0442155
RGS18	0.656414	0.00120082	0.0241284
RGS9BP	-0.459561	0.000736745	0.0181975
RHBDF1	-0.222291	0.00390579	0.0487881
RHBDL2	-0.342804	0.000995921	0.0215161
RHBG	-0.743217	4.72704e-05	0.00366566
RHCG	-1.15173	0.00100423	0.0215567
RHNO1	0.19962	0.00075703	0.0183661
RHOV	-0.510608	0.000564102	0.0158997
RIMS3	-0.580624	0.000328529	0.0111387
RIOK3	-0.244245	0.00131014	0.025572
RIOX1	0.201764	0.0014597	0.0268526
RMND5B	-0.28758	0.00101541	0.0216234
RNASE2	0.531911	0.000101467	0.00565177
RNF10	-0.160364	6.69721e-05	0.00444023
RNF103	-0.171085	0.000575604	0.0159494
RNF208	-0.842479	2.27739e-06	0.000725587
RNF222	-1.06362	0.00217738	0.0338943
RNF223	-0.846963	3.4041e-05	0.00291862
RNF224	-1.11204	6.77276e-05	0.00444491
RNF225	-1.02045	0.00294896	0.0412478
RNF39	-0.747472	0.000217578	0.00875444
RNPEPL1	-0.220356	0.0015116	0.0271128
RPA1	0.196695	0.000623828	0.0166925
RPGRIP1L	0.284168	0.000285266	0.0101115
RPL13A	-0.442173	0.00323877	0.0436908
RPL29	-0.480708	0.00243425	0.0364714
RPL3	-0.332316	0.00398385	0.0492603
RPL32	-0.510432	0.00128897	0.0252792
RPL35	-0.543474	0.000505312	0.0148564
RPL37	-0.498656	0.0022348	0.0344281
RPL4	-0.37866	7.55924e-05	0.00474292
RPL5	-0.338783	0.000218917	0.00878674
RPL6	-0.404681	2.21701e-06	0.000725587
RPL7A	-0.412035	0.000783115	0.0186926
RPLP0	-0.374686	3.32965e-05	0.00291862
RPLP1	-0.46988	0.000147589	0.00686625
RPS16	-0.434657	0.000500923	0.0147538
RPS24	-0.518169	0.000200233	0.00828036
RPS25	-0.336142	0.002138	0.0334722
RPS27A	-0.433024	0.00216042	0.0337587
RPS27AP5	-0.781879	0.00100423	0.0215567
RPS3	-0.51047	0.000119806	0.00613105
RPS6KB2	-0.259679	0.00302527	0.0419846
RPS7	-0.431811	2.99735e-06	0.000844364
RPS8	-0.446442	0.000567367	0.0159116
RPTN	-1.27174	0.00126799	0.025058
RRAGC	-0.23803	0.00140187	0.0262665
RTEL1	0.28321	0.000126447	0.0063131
RTL8C	-0.270091	0.000789766	0.0187167
RUFY3	-0.148397	0.00136818	0.0260225
RUNX1	0.218143	0.000577265	0.0159684
RXYLT1	0.291081	0.00184569	0.030779
S100A10	-0.382096	0.000417799	0.0131478
S100A11	-0.418786	2.24269e-06	0.000725587
S100A12	-1.21716	0.000164169	0.0072857
S100A14	-0.752664	1.40891e-06	0.00056012
S100A16	-0.580913	1.46503e-06	0.00056012
S100A3	-0.679861	0.000888549	0.0200702
S100A6	-0.582825	0.000188233	0.00800648
S100A7	-1.12289	0.000123672	0.00623154
S100A7A	-1.09912	0.00122065	0.0244369
S100A8	-1.0467	8.06787e-05	0.0049115
S100A9	-0.924094	3.39832e-05	0.00291862
S1PR3	0.40591	0.000100177	0.00563744
SAMD1	-0.214699	0.00338863	0.0448241
SAMD10	-0.475531	3.0056e-05	0.00273443
SBSN	-1.28768	0.000227117	0.00894056
SC5D	-0.369046	0.000544882	0.0155996
SCEL	-1.04645	6.69721e-05	0.00444023
SCNN1B	-0.720285	0.00388649	0.0485841
SCNN1D	-1.15057	0.00142474	0.0264831
SCO1	0.265561	8.39967e-08	0.000152837
SDC1	-0.505144	1.6212e-08	6.63718e-05
SDCBP	0.165061	0.00307935	0.0422695
SDCBP2	-0.912488	3.36701e-08	9.1897e-05
SDCCAG8	0.254446	1.69744e-07	0.000248769
SDR16C5	-0.568037	6.21201e-06	0.00124058
SDR9C7	-1.17419	0.000198388	0.00822484
SDS	0.376267	0.00123741	0.0246819
SEC11C	-0.277314	0.00357143	0.0463437
SEMA3F	-0.24415	0.00188507	0.0312325
SENP3	-0.00666558	0.00295701	0.0413174
SEPTIN11	0.228374	0.00239681	0.0360424
SERF2	-0.475996	0.000582274	0.0160527
SERPINB13	-0.817625	0.00275353	0.0396238
SERPINB2	-0.578564	0.000448317	0.0136971
SERPINB5	-0.466521	0.000376756	0.0122659
SERPINB7	-0.76611	0.00257613	0.0379036
SERPINB8	-0.488737	2.45367e-05	0.00248033
SERTAD1	-0.396309	0.00146364	0.0268526
SERTAD2	-0.140469	0.00284636	0.0404969
SFN	-0.662738	0.000225041	0.00894056
SFTA2	-2.20701	4.13843e-05	0.003355
SGCE	0.350952	0.00263632	0.0384096
SGTB	0.230493	0.00103525	0.0218189
SH2B3	0.34382	0.000636459	0.0169199
SH3BGRL3	-0.339958	0.000641944	0.0169283
SH3GL1	-0.280354	8.9495e-05	0.0051787
SH3GLB2	-0.43671	2.27371e-05	0.0023566
SH3PXD2A	-0.254491	0.00234772	0.0356314
SHCBP1	0.255727	0.00332126	0.0442907
SHMT1	0.214158	0.00114623	0.0234048
SHTN1	-0.178305	0.00395441	0.0490215
SIGLEC10	0.757948	0.000258929	0.00971766
SIGLEC7	0.56718	9.7008e-05	0.00549689
SIGLEC9	0.323891	0.00301762	0.0419139
SIRT2	-0.162972	0.000629213	0.0167817
SIRT7	-0.330975	0.000119425	0.00613105
SIX4	0.395831	0.000229914	0.00894317
SLAMF8	0.458188	0.00154025	0.0273273
SLAMF9	-0.964334	0.00211579	0.0332516
SLC10A6	-0.583395	0.00168214	0.0291981
SLC13A4	-0.93956	4.84121e-05	0.00366566
SLC16A9	-0.648623	0.00166432	0.0289946
SLC17A7	-0.701833	0.0013868	0.0261443
SLC22A14	-0.695244	0.00250691	0.0372195
SLC22A17	0.287075	0.00182146	0.0304993
SLC24A3	-0.407794	0.00386728	0.0484921
SLC25A3	-0.203283	0.002072	0.0329429
SLC26A9	-0.518663	0.00170465	0.0292615
SLC27A4	-0.445571	2.75868e-05	0.00261134
SLC34A3	-0.94705	0.00216598	0.0338132
SLC35B2	0.146131	0.00200788	0.0323952
SLC39A2	-0.838925	0.00127157	0.025058
SLC40A1	0.545472	4.48256e-05	0.0035808
SLC43A2	0.302455	4.9063e-05	0.00366875
SLC44A2	-0.241413	0.000703254	0.0178828
SLC52A3	-0.316278	0.0013868	0.0261443
SLC66A2	-0.28629	0.000183624	0.0078718
SLC7A6OS	0.117585	0.00237215	0.0358298
SLC7A7	0.445251	0.000600989	0.0163214
SLC8A1	0.690646	7.54374e-06	0.0013332
SLC8A2	-0.683258	0.00100949	0.0215601
SLC8B1	-0.254045	1.10703e-05	0.00163322
SLCO2B1	0.563668	0.000148986	0.00689208
SLCO4A1	-0.793489	9.38044e-06	0.00148777
SLF2	0.178077	0.00144018	0.0266793
SLFN11	0.400437	0.000908618	0.0202718
SLPI	-1.02179	0.000133859	0.00648541
SLURP1	-1.71542	0.00231748	0.0353361
SMARCA1	0.244206	0.0024595	0.0366819
SMARCA5	0.163657	0.000162131	0.00723448
SMARCAL1	0.126508	0.000715339	0.0180499
SMC4	0.261712	0.000731753	0.0181528
SMCHD1	0.217858	0.00324693	0.0436908
SMCO2	-0.290771	0.00220592	0.0341438
SMCR8	0.289709	5.03172e-06	0.00112876
SMIM10L2B	-0.426025	0.000318839	0.0109462
SMIM24	-0.946147	0.00336644	0.0447081
SMIM5	-0.855901	7.53462e-05	0.00474292
SMPDL3A	-0.37439	0.0009137	0.0203022
SMUG1	-0.233473	0.00327154	0.0439137
SMURF2	0.208684	0.000266096	0.0098674
SMYD4	0.233626	2.04846e-05	0.00223638
SNAP47	0.154241	0.000316934	0.0109265
SNRNP35	-0.363637	0.000139903	0.00666005
SNRNP48	0.230261	0.00360725	0.0466828
SNX24	-0.243466	0.000217578	0.00875444
SNX33	-0.294485	0.00049082	0.014561
SOAT1	0.317028	1.11318e-06	0.000492687
SOWAHB	-0.6454	0.00138306	0.0261443
SPAG5	0.171145	0.00272553	0.0393245
SPATA5	0.203948	0.00210477	0.0332378
SPATA9	0.349487	0.000557187	0.0158137
SPECC1	0.358299	0.000500923	0.0147538
SPHK2	0.143251	0.00282469	0.0403288
SPINK5	-1.26172	0.000345636	0.0115986
SPINK6	-2.21339	0.00172528	0.0295536
SPINK7	-2.50894	2.61363e-05	0.00253259
SPINT1	-0.305449	0.000164682	0.00728873
SPOP	0.120582	0.000866464	0.0198173
SPPL3	-0.276208	4.83905e-07	0.000324802
SPRING1	-0.170755	0.00107011	0.0222952
SPRR1A	-1.36654	3.24013e-05	0.00288372
SPRR1B	-1.0297	6.02752e-05	0.00414734
SPRR2A	-1.38745	3.85246e-05	0.00318626
SPRR2B	-1.48452	0.000141658	0.00672405
SPRR2D	-1.23189	1.51456e-05	0.00196845
SPRR2E	-1.3493	0.000137282	0.00661214
SPRR2F	-0.752958	1.73162e-05	0.00211399
SPRR2G	-1.30226	0.00148944	0.0269813
SPRR3	-1.24636	0.00309497	0.0424127
SPSB1	0.219643	0.00153612	0.0273133
SPTBN2	-0.349785	0.00307935	0.0422695
SQSTM1	0.257413	0.000703254	0.0178828
SRBD1	0.185411	0.000837808	0.0194059
SRCIN1	-0.291884	0.00402341	0.0494279
SREK1IP1	-0.271026	8.66466e-05	0.00510405
SRGAP2	0.124201	0.00368905	0.0472706
SRSF8	-0.207376	0.000432807	0.0133368
SSPN	0.394849	0.000273449	0.00992329
SST	-0.766717	0.0039857	0.0492603
ST14	-0.244965	0.00355364	0.0461495
STAC	0.743412	0.00298717	0.0416323
STAP2	-0.423688	0.000623828	0.0166925
STARD10	-0.492437	1.10703e-05	0.00163322
STAT1	0.365943	0.00203971	0.0327153
STIL	0.247281	0.00375382	0.0476902
STK40	-0.23259	0.00154852	0.0274147
STMP1	-0.304159	6.39599e-05	0.00431032
STPG1	-0.196161	0.00209379	0.0331605
STX19	-0.358746	0.00152382	0.027183
SUCLG1	-0.197208	0.00336322	0.0447046
SUCNR1	0.475782	0.00042775	0.0132667
SULT2B1	-1.09451	3.53993e-06	0.000920158
SYT6	0.074763	0.000552189	0.0157442
TACC1	0.280654	0.00196615	0.0319422
TACC2	-0.302313	0.000253481	0.0096088
TACSTD2	-0.455488	4.0662e-05	0.00331284
TAF1A	0.292906	7.36441e-05	0.00471092
TAF8	0.165373	0.000275108	0.00992329
TAGAP	0.250679	0.00400358	0.0492953
TAS1R3	-0.861322	0.00189004	0.0312325
TBC1D1	0.161156	0.00365249	0.0470229
TBC1D20	-0.155894	0.00121401	0.0243336
TBC1D31	0.180506	0.000416571	0.0131478
TBC1D9	0.317037	0.00383863	0.0482066
TBCCD1	0.289045	0.000305723	0.0106165
TBX15	0.401256	0.000259717	0.00971766
TCF12	0.183547	0.00324693	0.0436908
TEAD3	-0.166775	0.00324693	0.0436908
TECR	-0.42351	5.64405e-06	0.00116996
TEKT1	0.276541	9.82099e-05	0.00554581
TENT5B	-0.740827	0.000629213	0.0167817
TFAM	0.156302	0.00132085	0.0256891
TFEC	0.451883	0.00102955	0.0218149
TGFA	-0.358851	0.00150351	0.0270863
TGM1	-1.2467	0.000310348	0.0107221
TGM2	0.417939	0.00181665	0.0304993
TGM5	-1.07349	1.00643e-05	0.00156965
TGM7	-1.74088	0.00293059	0.0411237
THEG	-0.557372	4.7603e-05	0.00366566
THOC7	-0.254395	0.00150755	0.0270995
THTPA	0.181805	0.00292713	0.0411103
TIAM1	-0.435077	0.00102955	0.0218149
TIAM2	0.313647	6.87532e-05	0.00448567
TIMELESS	0.248302	0.000399723	0.0128602
TINCR	-0.358696	0.000731753	0.0181528
TLE3	-0.237553	0.00297961	0.0415976
TLN1	0.244563	0.00133164	0.025807
TLR1	0.426302	0.000896026	0.0201004
TLR3	0.343133	0.00144796	0.0267931
TLR4	0.42152	0.00204506	0.032737
TM4SF1	-0.394907	0.00226402	0.034715
TM7SF2	-0.949877	6.88471e-06	0.00130066
TMBIM1	-0.231652	0.00274651	0.0395575
TMED3	-0.337691	0.000120953	0.00617051
TMEM117	-0.364903	1.07183e-05	0.00162522
TMEM120A	-0.276291	0.000112054	0.00593827
TMEM125	-0.549868	0.00017691	0.00766423
TMEM134	-0.274089	0.000350824	0.0117247
TMEM159	-0.372817	8.95299e-07	0.000431218
TMEM176A	0.427443	0.0023783	0.0358298
TMEM182	0.35436	0.00196615	0.0319422
TMEM184A	-0.679207	2.61091e-05	0.00253259
TMEM191C	-0.420887	0.00274651	0.0395575
TMEM200A	0.54226	0.000807758	0.0189502
TMEM254	-0.239748	0.00183112	0.0305672
TMEM26	0.596782	0.0010324	0.0218149
TMEM268	0.271835	0.0013137	0.0255805
TMEM40	-0.865369	5.41903e-06	0.00113772
TMEM45B	-0.787688	5.67921e-05	0.00397448
TMEM54	-0.707332	4.55241e-07	0.000324802
TMEM59	-0.129174	0.00159904	0.0280964
TMEM67	0.293112	5.31961e-06	0.00113772
TMEM79	-0.598758	3.047e-05	0.00275678
TMEM94	0.148423	0.000498017	0.0147212
TMIE	-0.786266	3.31833e-05	0.00291862
TMPRSS11A	-0.848951	0.00151974	0.027183
TMPRSS11B	-1.206	0.00269077	0.0389966
TMPRSS11D	-0.920033	0.000974071	0.0211838
TMPRSS11E	-1.13059	0.000226423	0.00894056
TMPRSS11F	-0.713685	0.000892239	0.0200995
TMPRSS13	-0.700457	5.98738e-06	0.00121048
TNFSF13	0.39281	4.51689e-06	0.00103118
TNFSF4	-0.138617	0.00254323	0.0376564
TNNI3	-1.23166	0.00140836	0.0263305
TNRC18	0.184607	0.00288282	0.0407677
TNS1	0.364643	0.000255803	0.00966627
TOGARAM1	0.261015	0.00349202	0.0456751
TOLLIP	-0.351766	9.48464e-05	0.00544831
TOM1	-0.32185	0.00036574	0.0120997
TOP2A	0.2817	0.000112054	0.00593827
TOP3A	0.271262	1.19497e-06	0.000501765
TOX	0.26489	0.00206659	0.0328887
TOX2	0.462846	0.00170465	0.0292615
TP53BP1	0.294009	7.96767e-06	0.00137346
TP53INP2	-0.552715	0.000544882	0.0155996
TPCN1	-0.154863	0.00128897	0.0252792
TPPP3	-0.636796	0.000367919	0.0121101
TPRG1	-0.536984	0.0002385	0.00918982
TPRG1L	-0.199002	0.00251072	0.0372424
TPRN	-0.359893	0.00338863	0.0448241
TPST1	0.240916	0.00052323	0.0152192
TPX2	0.149844	0.00323062	0.0436507
TRANK1	0.281809	0.00100701	0.0215567
TRAPPC3	-0.200622	0.00336322	0.0447046
TRAPPC6B	0.185249	0.00408341	0.0498658
TREX2	-1.2287	0.000190577	0.00806432
TRIM13	-0.197232	0.000306643	0.0106165
TRIM29	-0.496257	4.48331e-06	0.00103118
TRIM37	0.222408	1.70149e-05	0.00209501
TRIM7	-0.356267	0.00182146	0.0304993
TRIP10	-0.302901	0.000772147	0.0185678
TRMT61B	0.140959	0.00135712	0.0259629
TRPT1	-0.279172	0.000134282	0.00648674
TSC22D4	-0.19274	0.00254978	0.0376852
TSPO	-0.421128	0.00059583	0.0162622
TSR1	0.253683	5.56741e-05	0.00397448
TTC19	0.251666	2.89747e-07	0.000324802
TTC21B	0.199158	0.000955317	0.0209148
TTC22	-0.571344	1.13111e-05	0.00165384
TTC39A	-0.774752	0.000392699	0.0126591
TTC9	-0.713986	0.000421505	0.0131478
TTYH1	-0.576374	0.000112412	0.00593827
TUB	0.498651	0.000683534	0.0176449
TUBA1B	0.250474	7.8811e-06	0.00137299
TUBA4A	-0.493893	0.00404332	0.0495609
TUBB2A	-0.621546	0.000729682	0.0181528
TUBB4B	-0.269233	0.000268526	0.0098674
TUT4	0.23448	0.000260506	0.00971766
TXNDC12	0.195256	0.000269341	0.0098674
TYMS	0.273009	0.000275108	0.00992329
TYRO3	-0.217065	0.00210477	0.0332378
UBA52	-0.411403	0.00166432	0.0289946
UBAC2	-0.155064	0.00258939	0.0379623
UBB	0.617082	2.14259e-23	3.5087e-19
UBFD1	0.135291	0.00196615	0.0319422
UBL5	-0.415978	0.00195071	0.0319422
UGCG	-0.35538	0.00381964	0.0481157
ULK2	0.257211	0.000269341	0.0098674
ULK3	-0.317741	0.000172027	0.00749231
UNC13D	-0.664734	3.94776e-06	0.000950713
UNC93A	-0.589726	0.00285657	0.0405717
UPP1	-0.770113	0.00360725	0.0466828
USH1G	-0.668815	4.37851e-05	0.00351482
USP11	0.471368	5.66812e-07	0.000357004
USP13	0.219732	0.00235991	0.0357171
USP18	0.433872	0.00169111	0.0291981
USP20	-0.183543	0.00323062	0.0436507
USP22	0.321494	6.6333e-07	0.000389931
USP3	-0.178065	0.000128874	0.00637792
VAMP8	-0.459457	0.000191168	0.00806846
VASN	-0.461317	0.000362495	0.0120166
VEZF1	0.177168	0.000888549	0.0200702
VGLL1	-0.24686	0.00352622	0.0459141
VNN1	-0.878848	0.00112752	0.0231381
VNN3	-0.706568	0.00194558	0.0318928
VPS26B	-0.160745	0.00178331	0.0301066
VPS33B	-0.413039	0.00287549	0.0407344
VPS35L	0.218739	0.00173665	0.0295935
VPS37B	-0.33544	1.91028e-05	0.00219548
VPS4A	-0.301206	0.00255635	0.0377142
VPS4B	-0.299838	0.000274277	0.00992329
VSIG10L	-1.2258	8.22666e-05	0.00498962
VSIG4	0.637504	0.000852024	0.0195691
VSIG8	-2.35178	0.00078298	0.0186926
VSNL1	-0.458916	2.03423e-05	0.00223574
WASF3	-0.511976	0.00279603	0.0400593
WDFY1	0.235568	0.00150755	0.0270995
WDFY2	-0.283882	0.000469806	0.0141947
WDHD1	0.267964	0.00126123	0.025035
WDR6	0.19177	0.00169561	0.0291981
WDR81	0.237325	0.00016727	0.00738334
WFDC1	-0.442671	0.00321438	0.0436112
WFDC12	-1.6869	0.00326612	0.0438769
WFDC5	-1.11538	0.000153252	0.00697126
WIPF1	0.328099	0.0010324	0.0218149
XAF1	0.381418	2.79685e-05	0.00263072
XK	-0.919051	0.000133436	0.00648414
XKR5	0.710739	0.00172766	0.0295634
YLPM1	0.173459	0.000226423	0.00894056
YOD1	-0.379843	0.00201844	0.0325015
YPEL3	-0.348352	0.000162131	0.00723448
ZBTB10	0.435617	5.62304e-05	0.00397448
ZBTB12	0.182733	0.00139055	0.0261443
ZBTB2	0.175205	0.000421505	0.0131478
ZBTB41	0.223583	0.00084964	0.0195417
ZBTB7A	-0.236722	1.36176e-05	0.00184299
ZBTB7B	-0.293117	0.000236326	0.0091491
ZDHHC1	-0.267769	0.000807758	0.0189502
ZDHHC12	-0.25146	0.00221167	0.0341682
ZDHHC18	-0.124317	0.00397402	0.0491901
ZHX2	0.311993	3.38678e-05	0.00291862
ZKSCAN8	0.187298	0.00350952	0.0457579
ZMYM3	0.254673	2.28614e-06	0.000725587
ZNF185	-0.716129	7.73371e-05	0.00479724
ZNF212	-0.173973	0.00133525	0.0258464
ZNF286A	0.337016	6.90998e-06	0.00130066
ZNF385A	-0.251195	0.000572296	0.0159116
ZNF394	-0.210656	0.000421505	0.0131478
ZNF41	0.369756	0.00271163	0.0391584
ZNF431	-0.283724	0.00354478	0.0460709
ZNF496	0.169599	0.000328529	0.0111387
ZNF524	-0.434631	0.00205042	0.0327908
ZNF600	-0.347712	0.00203438	0.0326937
ZNF618	0.392878	0.000347703	0.0116441
ZNF689	0.181884	0.000293997	0.0103538
ZNF704	0.36755	0.00322249	0.0436128
ZNF750	-0.622149	0.000317885	0.0109363
ZNF804A	0.12002	0.000843874	0.0194912
ZNF823	-0.261774	0.00197651	0.0320676
ZNF827	0.282775	0.00108495	0.0224615
ZNF878	-0.948565	0.0001832	0.0078718
ZRANB3	0.289565	9.44848e-06	0.00148777
ZSWIM7	0.0746652	0.000662435	0.0173291

## Sheet: intersectGenes
intersectGenes
A2ML1
ABCD4
ABCG4
ABI1
ABLIM1
ACER1
ACP1
AIDA
AL136531.2
ALDH3B2
ALOX12B
ALOXE3
ANKFY1
ANKRD22
APEX1
APRT
ARF5
ARHGEF10L
ARHGEF4
ARPC1A
ARPC3
ARPC5L
ARRDC4
ASAP1
ATP5MC2
ATP6V0A1
ATP6V1F
ATP8B2
ATP8B4
AURKB
BBX
BFAR
BICD2
BLNK
BNIPL
BPIFC
BRD9
BRPF3
BTN3A1
BTN3A3
BUB1
BVES
C10orf99
C1orf116
C2orf76
C3AR1
C6orf132
C9orf16
CAMKMT
CARD14
CASS4
CAT
CBX1
CCDC120
CCNK
CCR1
CD53
CD84
CDC40
CDH1
CDKN1A
CDKN2D
CDS1
CEACAM19
CELSR2
CENPV
CERS3
CES2
CFB
CHKA
CHMP2A
CHP1
CHTF8
CIBAR1
CLDN17
CLPX
CMTM1
CMYA5
CNFN
CNTROB
COMMD1
COPS3
COX6A1
COX6B1
CPVL
CRCT1
CREBL2
CRYBG2
CSF1
CSF1R
CSNK1E
CTSO
CTSS
CWH43
CXorf21
CYBB
CYP4F22
CYSLTR2
DAB2
DAGLA
DBF4B
DBI
DCUN1D3
DEFB4A
DENND2C
DERL2
DOK4
DSC1
DSC2
DSC3
DSG1
DSG3
DTD1
DUOX1
DUOXA1
DYNLT3
E2F5
EBP
EBPL
ECM1
EFNA4
EFR3A
EIF2AK2
EIF2B4
ELOF1
ELP5
EMC6
ENDOU
ENSA
ENY2
EPHB3
ESRP2
ETV2
EVPL
EXO1
EXOC6B
EXPH5
F11R
FAM161B
FAM83C
FAM98C
FBRS
FDXR
FEM1B
FLII
FNDC3A
FOXN1
FPR3
FTH1
FUT2
GCOM1
GFOD2
GIMAP2
GIMAP6
GJB2
GJB6
GJD3
GLB1L2
GLOD4
GLRX3
GNRHR
GNS
GPR34
GRHL1
GRHL3
HMGCR
HNRNPA2B1
HOMER2
HPS5
HSD17B1
HSPD1
ICAM1
IL2RA
IL2RB
IL36A
IL36B
IL36RN
ILVBL
IQGAP2
ITGA4
ITSN2
IVL
JUP
KAZN
KCMF1
KCNK10
KIF18B
KLF8
KPRP
KRT16
KRT6A
KRT6B
KRT80
LASP1
LCE1F
LCE2B
LCE3A
LCE3D
LCE3E
LCMT1
LCP2
LENG9
LIN7B
LIPG
LIPM
LIPN
LRRCC1
LTBP2
LYPD3
MAB21L4
MACO1
MASP1
MAST4
MBOAT2
MED9
MFSD14A
MFSD2B
MINDY1
MITF
MMAB
MOB2
MPZL2
MPZL3
MRPS28
MS4A7
MTA1
MTFP1
MTHFS
MTSS2
MUC15
MXD1
MYO5B
MYZAP
NAA80
NACA
NAIP
NBEAL2
NCCRP1
NCOR1
NEK1
NEK2
NEK4
NHEJ1
NLRX1
NOL3
NONO
NOP10
NR2F6
NRP1
NSL1
NUDCD1
NUP153
NUP43
OSBPL2
OVOL1
P2RY2
PATZ1
PCDH1
PCNX1
PDZK1IP1
PELP1
PGLYRP3
PGLYRP4
PHGDH
PHLPP2
PIK3C2B
PIK3R1
PIMREG
PKP1
PLA2G4E
PLA2G4F
PLCD1
PLD1
PLEKHM1
PLSCR1
PLXNC1
PMS1
PNKD
POF1B
POLK
POLR1D
POLR2J
POU2F3
PPL
PRADC1
PRDX5
PRKDC
PRPF8
PRSS8
PSD4
PSENEN
PSMC3IP
PTPRJ
PYM1
QSOX1
RAB10
RAB22A
RAB23
RAB39A
RAB43
RAB5B
RAD51AP1
RAD54L
RAET1E
RAI1
RASAL1
RAVER1
RBMX
RCAN3
RECQL
RELCH
RGS18
RHCG
RHNO1
RIMS3
RNF222
RNF223
RNF225
RPL13A
RPL29
RPL3
RPL32
RPL35
RPL37
RPL4
RPL5
RPL6
RPL7A
RPLP0
RPLP1
RPS16
RPS24
RPS25
RPS27A
RPS27AP5
RPS3
RPS7
RPS8
RXYLT1
S100A12
S100A6
S100A7
S100A7A
SAMD1
SBSN
SCNN1B
SDR9C7
SENP3
SERF2
SERPINB13
SERPINB5
SERPINB7
SERPINB8
SERTAD2
SH2B3
SH3PXD2A
SIGLEC9
SIRT7
SLAMF8
SLC10A6
SLC24A3
SLC25A3
SLC26A9
SLC35B2
SLC39A2
SLC40A1
SLC43A2
SLC8A1
SLCO2B1
SLURP1
SMCO2
SMCR8
SMIM24
SMPDL3A
SMUG1
SNAP47
SNRNP35
SNX33
SPAG5
SPINK5
SPRR1B
SPRR2B
SPRR2E
SPRR2G
SPTBN2
STAT1
SUCLG1
SUCNR1
TACC1
TACC2
TAF1A
TAGAP
TBC1D20
TBC1D31
TBC1D9
TCF12
TENT5B
TFEC
TGM1
TGM5
THOC7
TIAM1
TLE3
TLN1
TLR1
TLR3
TLR4
TMEM120A
TMEM191C
TMEM45B
TMEM79
TMPRSS11D
TMPRSS11F
TMPRSS13
TNFSF13
TNNI3
TNS1
TOGARAM1
TOM1
TOX
TP53BP1
TP53INP2
TPRN
TPX2
TRANK1
TRAPPC3
TRAPPC6B
TRIM29
TRPT1
TSPO
TTC19
TTC22
TTC9
TUBB2A
TYMS
UBA52
UBL5
UNC93A
USP18
USP22
VASN
VNN3
VPS33B
VPS35L
VPS4A
VPS4B
VSIG10L
WDFY1
WDR81
WFDC5
WIPF1
XAF1
YLPM1
ZBTB12
ZBTB7A
ZBTB7B
ZNF185
ZNF394
ZNF41
ZNF496
ZNF524
ZNF600
ZNF704
ZNF750
ZNF804A
ZNF827
ZRANB3
ZSWIM7
