# Supplementary material for: Multi omics analysis of mitophagy subtypes and integration of machine learning for predicting immunotherapy responses in head and neck squamous cell carcinoma
Source: Aging (Albany NY). 2024 Jun 21;16(12):10579–614. doi: 10.18632/aging.205964 (PMC11236326; doi:10.18632/aging.205964)
Supplement: Supplementary Table 4 [file aging-16-205964-s004.xlsx]

## Sheet: Uni_cox_gene_fc
Supplementary Table 4. Univariate COX regression analysis of subtype differential genes.
	gene	coef	HR	95% CI	p.value
1	CPEB4	-0.00309958	1	(0.98-1)	0.75
2	DSC2	-0.00113751	1	(1-1)	0.053
3	ZNF185	-0.0014103	1	(1-1)	0.064
4	S100A7A	-0.000527681	1	(1-1)	0.3
5	SASH1	-0.02731	0.97	(0.96-0.99)	0.0002
6	SAMD9	-9.22896e-05	1	(1-1)	0.92
7	DSP	-0.000271273	1	(1-1)	0.048
8	DSC1	-0.00182579	1	(1-1)	0.17
9	ZNF366	-0.0588416	0.94	(0.85-1)	0.25
10	STEAP4	0.000241802	1	(0.99-1)	0.95
11	RIMS3	-0.0231368	0.98	(0.96-1)	0.046
12	CRYBG3	-0.0173418	0.98	(0.96-1)	0.1
13	MS4A2	-0.29259	0.75	(0.65-0.86)	5.3e-05
14	SLC28A3	-0.00330697	1	(0.99-1)	0.57
15	FAM83B	-0.00122948	1	(1-1)	0.49
16	ZNF770	-0.00861244	0.99	(0.98-1)	0.038
17	LYPD3	-0.000475031	1	(1-1)	0.0083
18	TGM5	-0.036274	0.96	(0.95-0.98)	0.00018
19	SLC18A2	-0.283451	0.75	(0.61-0.93)	0.0091
20	ATP10B	-0.0418673	0.96	(0.94-0.98)	4.7e-05
21	EPPK1	-0.0022107	1	(0.99-1)	0.59
22	PPL	-0.001198	1	(1-1)	0.02
23	C10orf99	-0.000736452	1	(1-1)	0.0047
24	P2RX7	0.00197528	1	(0.96-1)	0.92
25	ABCA12	-0.00607747	0.99	(0.99-1)	0.1
26	LYPD5	-0.005043	0.99	(0.99-1)	0.029
27	AHNAK2	0.00180756	1	(1-1)	0.11
28	DSG3	-0.000293509	1	(1-1)	0.17
29	SDR9C7	-0.00507507	0.99	(0.99-1)	0.0051
30	KRT80	-0.00302074	1	(1-1)	0.00058
31	XCR1	-0.109307	0.9	(0.83-0.97)	0.0094
32	SLAMF7	-0.00384187	1	(0.99-1)	0.39
33	FLG	-0.0101705	0.99	(0.98-1)	0.039
34	DSG1	-0.000693915	1	(1-1)	0.019
35	MALL	-0.00834803	0.99	(0.98-1)	0.068
36	KRT6B	-3.64121e-05	1	(1-1)	0.087
37	A2ML1	-0.00220152	1	(1-1)	0.00013
38	ABCB11	0.155076	1.2	(0.72-1.9)	0.53
39	PCDHGC3	0.00926137	1	(1-1)	0.027
40	GPR1	-0.0125722	0.99	(0.97-1)	0.11
41	USP2	0.00529503	1	(0.99-1)	0.53
42	SIGLEC6	-0.264316	0.77	(0.6-0.98)	0.032
43	CYP7B1	-0.0161823	0.98	(0.97-1)	0.063
44	IVL	-0.000541619	1	(1-1)	0.012
45	AOX1	-0.0479155	0.95	(0.91-1)	0.04
46	MUC15	-0.0166177	0.98	(0.97-0.99)	0.002
47	PGLYRP3	-0.00195799	1	(0.99-1)	0.29
48	CPA3	-0.00979573	0.99	(0.98-1)	0.0032
49	PLCD4	-0.0470575	0.95	(0.9-1)	0.11
50	PGLYRP4	-0.007095	0.99	(0.99-1)	0.007
51	GJB2	3.77797e-05	1	(1-1)	0.56
52	CCR4	-0.0473446	0.95	(0.92-0.99)	0.017
53	ALDH3B2	-0.0016721	1	(1-1)	0.02
54	GRHL3	-0.0081922	0.99	(0.99-1)	3.7e-06
55	PLA2G4D	-0.0123082	0.99	(0.98-1)	0.048
56	LAX1	-0.045721	0.96	(0.92-0.99)	0.0089
57	CCR8	-0.0426882	0.96	(0.91-1)	0.098
58	SLC6A14	-0.00266895	1	(0.99-1)	0.27
59	S100A7	-2.6541e-05	1	(1-1)	0.21
60	BNIPL	-0.011079	0.99	(0.98-0.99)	0.00015
61	SLC39A2	-0.00567842	0.99	(0.99-1)	0.091
62	SLC5A1	-0.00946112	0.99	(0.98-1)	0.046
63	PLA2G2F	-0.0277736	0.97	(0.95-1)	0.056
64	PNLIPRP3	0.00170918	1	(1-1)	0.51
65	UNC93A	-0.0357824	0.96	(0.93-1)	0.062
66	CLCA2	0.000180005	1	(1-1)	0.48
67	PDZK1IP1	-0.00100248	1	(1-1)	0.011
68	COL6A6	-0.11625	0.89	(0.78-1)	0.089
69	C1orf68	-0.00608984	0.99	(0.99-1)	0.16
70	KRT2	-0.00147673	1	(1-1)	0.27
71	NLGN4X	-0.00856174	0.99	(0.97-1)	0.41
72	SERPINB7	-0.00584959	0.99	(0.99-1)	0.0086
73	SULT2B1	-0.00275765	1	(1-1)	0.0097
74	WFDC5	-0.00278987	1	(0.99-1)	0.016
75	CXCR1	-0.00258381	1	(0.97-1)	0.82
76	BBOX1	-0.00368582	1	(0.99-1)	0.52
77	POU3F1	-0.0088891	0.99	(0.98-1)	0.039
78	PEG3	-0.0928998	0.91	(0.85-0.98)	0.014
79	SCNN1B	-0.0167448	0.98	(0.98-0.99)	6.9e-05
80	CNFN	-0.000224406	1	(1-1)	0.0044
81	SPTLC3	-0.0039924	1	(0.97-1)	0.76
82	TGM1	-0.000600725	1	(1-1)	0.053
83	CYP4F22	-0.00573457	0.99	(0.99-1)	0.024
84	SPRR2B	-0.000631372	1	(1-1)	0.012
85	ALOX12B	-0.00534921	0.99	(0.99-1)	0.00029
86	PNPLA1	-0.0220205	0.98	(0.95-1)	0.14
87	S100A12	-0.00037256	1	(1-1)	0.29
88	KRT16	-2.9099e-05	1	(1-1)	0.017
89	RDH12	-0.00548405	0.99	(0.99-1)	0.038
90	SERPINB13	-0.00135862	1	(1-1)	0.067
91	KCNK10	-0.00739027	0.99	(0.95-1)	0.75
92	FAM83C	-0.00399081	1	(0.99-1)	0.0022
93	VNN3	-0.0362211	0.96	(0.92-1)	0.15
94	CLDN17	-0.012962	0.99	(0.98-1)	0.011
95	FLG2	-0.00701541	0.99	(0.98-1)	0.33
96	SERPINB4	-0.000561767	1	(1-1)	0.31
97	PPP2R2C	-0.00188841	1	(0.99-1)	0.45
98	LCE3D	-0.000294251	1	(1-1)	0.069
99	NIPAL4	0.00243917	1	(1-1)	0.11
100	TMPRSS11D	-0.00230159	1	(1-1)	0.002
101	PLA2G4F	-0.0163701	0.98	(0.97-1)	0.0067
102	SLC22A3	0.000626927	1	(0.99-1)	0.89
103	CEACAM6	-0.0012812	1	(1-1)	0.013
104	ZNF831	-0.301217	0.74	(0.62-0.89)	0.0012
105	S100A9	-8.13519e-06	1	(1-1)	0.15
106	CNGB1	0.00423748	1	(1-1)	0.23
107	KLK7	-0.000506849	1	(1-1)	0.19
108	HAL	-0.0116165	0.99	(0.97-1)	0.13
109	RAET1E	-0.0151281	0.98	(0.97-1)	0.013
110	CHI3L2	-0.00782486	0.99	(0.98-1)	0.082
111	SPRR1B	-2.52899e-05	1	(1-1)	0.13
112	LY6G6C	-0.00278201	1	(1-1)	0.0017
113	SCEL	-0.00259535	1	(0.99-1)	0.063
114	GFRA1	-0.0348763	0.97	(0.91-1)	0.24
115	SERPINB3	-0.000327856	1	(1-1)	0.27
116	SPINK5	-0.00168905	1	(1-1)	0.00068
117	LCE1B	-0.00878019	0.99	(0.97-1)	0.45
118	KRT75	-4.86288e-05	1	(1-1)	0.9
119	KRT1	-1.35276e-05	1	(1-1)	0.76
120	MASP1	-0.060827	0.94	(0.91-0.98)	0.0016
121	S100A8	-2.72382e-05	1	(1-1)	0.065
122	TMEM45B	-0.00410231	1	(0.99-1)	0.067
123	KLK6	-0.000733155	1	(1-1)	0.06
124	SPRR2G	-0.000119422	1	(1-1)	0.11
125	ALOXE3	-0.0116231	0.99	(0.98-1)	0.016
126	ACER1	-0.0236069	0.98	(0.96-1)	0.035
127	SBSN	-0.000171154	1	(1-1)	0.03
128	LCE2B	-0.00486672	1	(0.99-1)	0.15
129	RHCG	-0.000303714	1	(1-1)	0.064
130	FLRT3	0.00154305	1	(1-1)	0.59
131	MMRN1	-0.0335752	0.97	(0.93-1)	0.094
132	RNASE7	0.0011216	1	(1-1)	0.3
133	SPRR1A	-3.11333e-05	1	(1-1)	0.042
134	THBS2	0.000762668	1	(1-1)	0.12
135	KRT37	-0.0162207	0.98	(0.95-1)	0.39
136	CDA	0.000295154	1	(1-1)	0.63
137	SLC6A2	0.014298	1	(0.99-1)	0.22
138	CRCT1	-0.000491653	1	(1-1)	0.1
139	SLURP1	-0.000731047	1	(1-1)	0.0048
140	GJB6	0.00022056	1	(1-1)	0.24
141	TRIML1	0.0794992	1.1	(0.97-1.2)	0.17
142	KRT10	1.17701e-05	1	(1-1)	0.78
143	GPR78	-0.00532108	0.99	(0.86-1.1)	0.94
144	MYOM3	0.00691399	1	(1-1)	0.11
145	PI3	-1.11722e-05	1	(1-1)	0.22
146	KRT78	-0.00211764	1	(1-1)	0.012
147	KLK13	-0.000747043	1	(1-1)	0.093
148	CLCA4	-0.00260886	1	(1-1)	0.018
149	SLC26A9	-0.0250883	0.98	(0.96-0.99)	0.0013
150	POF1B	-0.00495163	1	(0.99-1)	0.005
151	SPRR4	-0.00218352	1	(1-1)	0.024
152	ARL14	0.00315366	1	(1-1)	0.3
153	SLC6A11	0.00498502	1	(0.99-1)	0.48
154	SPINK6	-0.00102947	1	(1-1)	0.058
155	RPTN	-0.00474193	1	(0.99-1)	0.003
156	PSORS1C2	-0.00295843	1	(0.99-1)	0.14
157	GPR15	-0.0172406	0.98	(0.96-1)	0.15
158	KRTDAP	-9.4656e-05	1	(1-1)	0.052
159	WFDC12	-0.00220692	1	(1-1)	0.011
160	CASP14	-0.000255529	1	(1-1)	0.61
161	CPA4	0.00107998	1	(1-1)	0.51
162	KLK10	-0.000543881	1	(1-1)	0.072
163	PLA2G3	-0.0145407	0.99	(0.98-0.99)	0.0007
164	KLK5	3.13848e-05	1	(1-1)	0.91
165	MMP3	0.000400667	1	(1-1)	0.035
166	EREG	0.00255589	1	(1-1)	0.22
167	SPINK7	-0.00186248	1	(1-1)	0.0061
168	KLK12	-0.00259172	1	(1-1)	0.0045
169	SERPINB12	-0.00431783	1	(0.99-1)	0.18
170	FCRL5	-0.0480602	0.95	(0.89-1)	0.14
171	CARD18	-0.00084124	1	(0.99-1)	0.81
172	FABP4	5.13418e-06	1	(1-1)	0.89
173	MAL	-0.000208552	1	(1-1)	0.44
174	CRNN	-6.36308e-05	1	(1-1)	0.64
175	ATP12A	-0.00122706	1	(0.99-1)	0.64
176	NEFM	0.000656223	1	(1-1)	0.82
177	MYH2	0.000171648	1	(1-1)	0.28
178	PNCK	-0.000606482	1	(0.99-1)	0.93
179	TNNI3	0.0217682	1	(1-1)	0.062
180	KRT8	0.000364372	1	(1-1)	0.11
181	NR5A1	-0.00455139	1	(0.99-1)	0.26
182	PPP1R1B	-0.00259078	1	(0.99-1)	0.5
183	HOXB13	-0.0162157	0.98	(0.96-1)	0.14
184	CLDN3	-0.00279241	1	(0.99-1)	0.085
185	KRT19	-1.73684e-05	1	(1-1)	0.71
186	RPS4Y1	-0.000529707	1	(1-1)	0.13
187	GPC4	0.00331366	1	(1-1)	0.036
188	PEG10	0.00174128	1	(1-1)	0.42
189	NRK	0.15254	1.2	(0.94-1.5)	0.17
190	CXCL11	0.000447436	1	(1-1)	0.25
191	IP6K3	0.00144212	1	(0.99-1)	0.74
192	MYH7	-8.21118e-05	1	(1-1)	0.86
193	MYBPC1	6.15742e-05	1	(1-1)	0.91
194	ACTC1	0.000362844	1	(1-1)	0.22
