# Supplementary material for: Multi omics analysis of mitophagy subtypes and integration of machine learning for predicting immunotherapy responses in head and neck squamous cell carcinoma
Source: Aging (Albany NY). 2024 Jun 21;16(12):10579–614. doi: 10.18632/aging.205964 (PMC11236326; doi:10.18632/aging.205964)
Supplement: Supplementary Table 6 [file aging-16-205964-s006.xlsx]

## Sheet: B_cells
Supplementary Table 6. The result of receptor ligand pairs between riskhighepi or risklowepi and others.
interacting_pair	Riskhighepi|B_cells	Risklowepi|B_cells
MIF_TNFRSF14	1.225	1.074
TNC_a4b1 complex	0.245	0.115
LAMP1_FAM3C	0.643	0.548
MDK_SORL1	0.715	0.636
EGFR_AREG	0.416	0.34
PLXNB2_SEMA4D	0.222	0.244
CD55_ADGRE5	0.63	0.656
PLAUR_a4b1 complex	0.398	0.452
CDH1_aEb7 complex	0.273	0.332
CXADR_FAM3C	0.429	0.524

## Sheet: Endothelial_cells
interacting_pair	Riskhighepi|Endothelial_cells	Risklowepi|Endothelial_cells
COL17A1_a1b1 complex	0.491	0.23
COL17A1_a10b1 complex	0.517	0.257
COL17A1_a2b1 complex	0.481	0.221
CD44_SELE	1.228	1.06
MIF_TNFRSF14	1.17	1.018
CDH1_a2b1 complex	0.239	0.298
EFNA3_EPHA4	0.121	0.181
CEACAM1_SELE	0.679	0.765
CXADR_FAM3C	0.457	0.552
CXCL1_ACKR1	1.285	1.529

## Sheet: Fibroblasts
interacting_pair	Riskhighepi|Fibroblasts	Risklowepi|Fibroblasts
COL17A1_a1b1 complex	0.553	0.293
COL17A1_a11b1 complex	0.529	0.269
MIF_TNFRSF14	1.102	0.95
TNC_a8b1 complex	0.23	0.1
LAMP1_FAM3C	0.789	0.695
EDN2_EDNRA	0.152	0.236
ERBB3_NRG1	0.117	0.203
CXADR_FAM3C	0.576	0.671
EPHA2_EFNA4	0.174	0.28
DSC2_DSG2	0.24	0.438

## Sheet: Dendritic_cells
interacting_pair	Riskhighepi|Dendritic_cells	Risklowepi|Dendritic_cells
MIF_TNFRSF14	1.176	1.024
TNC_a4b1 complex	0.277	0.147
LAMP1_FAM3C	0.539	0.444
EGFR_GRN	0.99	0.914
EGFR_TGFB1	0.451	0.376
F11R_aLb2 complex	0.295	0.377
NAMPT_P2RY6	0.417	0.501
CXADR_FAM3C	0.326	0.42
ANXA1_FPR1	1.043	1.303
CXCL17_GPR35	0.214	0.494

## Sheet: Mast_cells
interacting_pair	Riskhighepi|Mast_cells	Risklowepi|Mast_cells
MIF_TNFRSF14	1.104	0.953
TNC_a4b1 complex	0.241	0.111
LAMP1_FAM3C	0.561	0.467
EGFR_COPA	0.315	0.239
EGFR_TGFB1	0.448	0.373
PLAUR_a4b1 complex	0.393	0.448
CDH1_KLRG1	0.367	0.426
CDH1_aEb7 complex	0.277	0.336
CXADR_FAM3C	0.348	0.443
CXCL17_GPR35	0.238	0.518

## Sheet: Myeloids
interacting_pair	Riskhighepi|Myeloids	Risklowepi|Myeloids
CD44_HBEGF	0.84	0.672
MIF_TNFRSF14	1.223	1.071
CD47_SIRB1 complex	0.488	0.338
TNC_a4b1 complex	0.241	0.111
HLA-F_LILRB2	0.484	0.381
CEACAM1_CD209	0.095	0.181
CXADR_FAM3C	0.357	0.451
ANXA1_FPR1	1.171	1.43
ANXA1_FPR3	1.25	1.51
CXCL17_GPR35	0.194	0.474

## Sheet: NK_cells
interacting_pair	Riskhighepi|NK_cells	Risklowepi|NK_cells
COL17A1_a1b1 complex	0.499	0.239
MIF_TNFRSF14	1.173	1.021
CD47_SIRPG	0.645	0.496
TNC_a4b1 complex	0.263	0.133
LAMP1_FAM3C	0.598	0.503
PLAUR_a4b1 complex	0.416	0.47
ICAM1_SPN	0.324	0.378
CDH1_aEb7 complex	0.347	0.406
F11R_aLb2 complex	0.358	0.44
CXADR_FAM3C	0.384	0.479

## Sheet: Plasma_cells
interacting_pair	Riskhighepi|Plasma_cells	Risklowepi|Plasma_cells
MIF_TNFRSF14	1.078	0.926
TNC_a4b1 complex	0.212	0.082
LAMP1_FAM3C	0.651	0.557
EGFR_COPA	0.254	0.178
EGFR_AREG	0.309	0.234
PLXNB2_SEMA4D	0.164	0.187
PLAUR_a4b1 complex	0.365	0.42
CDH1_aEb7 complex	0.268	0.327
F11R_aLb2 complex	0.271	0.352
CXADR_FAM3C	0.438	0.533

## Sheet: Smooth_muscle_cells
interacting_pair	Riskhighepi|Smooth_muscle_cells	Risklowepi|Smooth_muscle_cells
COL17A1_a1b1 complex	0.685	0.424
MIF_TNFRSF14	1.088	0.936
MIF_TNFRSF10D	1.035	0.883
LAMA3_a3b1 complex	0.315	0.185
TNC_a8b1 complex	0.305	0.175
NOTCH3_JAG2	0.148	0.2
EDN2_EDNRA	0.348	0.432
CEACAM1_SELE	0.095	0.181
CXADR_FAM3C	0.444	0.539
CXCL1_ACKR1	0.517	0.761

## Sheet: T_cells
interacting_pair	Riskhighepi|T_cells	Risklowepi|T_cells
COL17A1_a1b1 complex	0.5	0.239
MIF_TNFRSF14	1.124	0.972
CD47_SIRPG	0.691	0.541
LAMA3_a3b1 complex	0.232	0.102
TNC_a4b1 complex	0.27	0.14
CDH1_aEb7 complex	0.337	0.396
F11R_aLb2 complex	0.365	0.447
CXADR_FAM3C	0.486	0.581
EPHA2_EFNA4	0.166	0.272
DSC2_DSG2	0.222	0.42
